# Supplementary material for: The Gene Structure and Expression Level Changes of the GH3 Gene Family in Brassica napus Relative to Its Diploid Ancestors
Source: MDPI journal article supplement (doi:10.3390/genes10010058), 2019-01-17
Supplement: s1 [file s1]

Figure S1 The sequence alignment of 148 proteins

|                 |                             |
|-----------------|-----------------------------|
| AtGH3-1         | .....                       |
| AtGH3-2         | .....                       |
| AtGH3-3         | .....                       |
| AtGH3-4         | .....                       |
| AtGH3-5         | .....                       |
| AtGH3-6         | .....                       |
| AtGH3-7         | .....                       |
| AtGH3-8         | .....                       |
| AtGH3-9         | .....                       |
| AtGH3-10        | .....                       |
| AtGH3-11        | .....                       |
| AtGH3-12        | .....                       |
| AtGH3-13        | .....                       |
| AtGH3-14        | .....MFLSPRSAHQKVGLSMLIDPLP |
| AtGH3-15        | .....MFLSPRSAHQKVGLSMLIDPLP |
| AtGH3-16        | .....                       |
| AtGH3-17        | .....                       |
| AtGH3-18        | .....                       |
| AtGH3-19        | .....                       |
| BraX.GH3-1.a    | .....                       |
| BraX.GH3-2.a    | .....                       |
| BraA09.GH3-3.a  | .....                       |
| BraA01.GH3-5.a  | .....                       |
| BraA03.GH3-5.b  | .....                       |
| BraA02.GH3-6.a  | .....                       |
| BraA03.GH3-6.b  | .....                       |
| BraA06.GH3-7.a  | .....                       |
| BraA08.GH3-7.b  | .....                       |
| BraA02.GH3-8.a  | .....                       |
| BraA03.GH3-8.b  | .....                       |
| BraA03.GH3-8.c  | .....                       |
| BraA03.GH3-8.d  | .....                       |
| BraA06.GH3-8.e  | .....                       |
| BraA06.GH3-8.f  | .....                       |
| BraA09.GH3-8.g  | .....                       |
| BraA09.GH3-8.h  | .....                       |
| BraA10.GH3-8.i  | .....                       |
| BraA09.GH3-10.a | .....                       |
| BraA03.GH3-11.a | .....                       |
| BraA04.GH3-11.b | .....                       |
| BraA05.GH3-11.c | .....                       |
| BraA02.GH3-12.a | .....                       |
| BraA03.GH3-12.b | .....                       |
| BraA06.GH3-12.c | .....                       |
| BraA10.GH3-12.d | .....                       |
| BraA10.GH3-14.a | .....                       |
| BraA03.GH3-15.a | .....                       |
| BraA07.GH3-15.b | .....                       |
| BraA02.GH3-16.a | .....                       |
| BraA07.GH3-17.a | .....                       |
| BraA09.GH3-17.b | .....                       |
| BraAX.GH3-17.c  | .....                       |
| BraA04.GH3-19.a | .....                       |
| BraA06.GH3-19.b | .....                       |
| BraA09.GH3-19.c | .....                       |
| BraA09.GH3-19.d | .....                       |
| BraAX.GH3-19.e  | .....                       |
| BolC09.GH3-1.a  | .....                       |
| BolC01.GH3-2.a  | .....                       |
| BolC08.GH3-3.a  | .....                       |
| BolC01.GH3-5.a  | .....                       |
| BolC07.GH3-5.b  | .....                       |
| BolC02.GH3-6.a  | .....                       |
| BolC03.GH3-6.b  | .....                       |
| BolC06.GH3-7.a  | .....                       |
| BolC01.GH3-8.a  | .....                       |
| BolC03.GH3-8.b  | .....                       |
| BolC07.GH3-8.c  | .....                       |
| BolC08.GH3-8.d  | .....                       |
| BolC09.GH3-8.e  | .....                       |
| BolC09.GH3-10.a | .....                       |
| BolC03.GH3-11.a | .....                       |
| BolC04.GH3-11.b | .....                       |
| BolCX.GH3-11.c  | .....                       |
| BolC03.GH3-12.a | .....                       |
| BolC09.GH3-12.b | .....                       |
| BolC09.GH3-14.a | .....                       |
| BolC03.GH3-15.a | .....                       |
| BolCX.GH3-16.a  | .....                       |
| BolC07.GH3-17.a | .....                       |
| BolC08.GH3-17.b | .....                       |
| BolC08.GH3-19.a | .....                       |
| BnaA09R.GH3-1.a | .....                       |
| BnaCX.GH3-1.a   | .....                       |
| BnaA01.GH3-2.a  | .....                       |
| BnaC01.GH3-2.a  | .....                       |
| BnaA09.GH3-3.a  | .....                       |
| BnaC08.GH3-3.a  | .....                       |
| BnaA01.GH3-5.a  | .....                       |
| BnaA03.GH3-5.b  | .....                       |
| BnaC01.GH3-5.a  | .....                       |
| BnaC07.GH3-5.b  | .....                       |
| BnaA03.GH3-6.a  | .....                       |
| BnaAX.GH3-6.b   | .....                       |
| BnaC03.GH3-6.a  | .....                       |
| BnaCX.GH3-6.b   | .....                       |
| BnaA06.GH3-7.a  | .....                       |
| BnaA08.GH3-7.b  | .....                       |
| BnaC06.GH3-7.a  | .....                       |
| BnaA03.GH3-8.a  | .....                       |
| BnaA03.GH3-8.b  | .....                       |
| BnaA03.GH3-8.c  | .....                       |
| BnaA06.GH3-8.d  | .....                       |

|                  |                                                             |
|------------------|-------------------------------------------------------------|
| BnaA06.GH3-8.e   | .....                                                       |
| BnaA09.GH3-8.f   | .....                                                       |
| BnaA09.GH3-8.g   | .....                                                       |
| BnaAX.GH3-8.h    | .....                                                       |
| BnaAX.GH3-8.i    | .....                                                       |
| BnaC01.GH3-8.a   | .....                                                       |
| BnaC02.GH3-8.b   | .....                                                       |
| BnaC02.GH3-8.c   | .....                                                       |
| BnaC02.GH3-8.d   | .....                                                       |
| BnaC07.GH3-8.e   | .....                                                       |
| BnaC09.GH3-8.f   | .....                                                       |
| BnaCX.GH3-8.g    | .....                                                       |
| BnaA05.GH3-9.a   | .....                                                       |
| BnaC04.GH3-9.a   | .....                                                       |
| BnaA03.GH3-10.a  | .....                                                       |
| BnaA09.GH3-10.b  | .....                                                       |
| BnaC09.GH3-10.a  | .....                                                       |
| BnaA03.GH3-11.a  | .....                                                       |
| BnaA04R.GH3-11.b | .....                                                       |
| BnaA05.GH3-11.c  | .....                                                       |
| BnaC04.GH3-11.a  | MCMKKELQVRNKSEIMHQKLTRELCESNHCSTKSLKDFENERKEHVVEELCDEFKAVEN |
| BnaCX.GH3-11.b   | .....                                                       |
| BnaA02.GH3-12.a  | .....                                                       |
| BnaA03.GH3-12.b  | .....                                                       |
| BnaA06.GH3-12.c  | .....                                                       |
| BnaA10.GH3-12.d  | .....                                                       |
| BnaC02.GH3-12.a  | .....                                                       |
| BnaC03.GH3-12.b  | .....                                                       |
| BnaC09.GH3-12.c  | .....                                                       |
| BnaA10.GH3-14.a  | .....                                                       |
| BnaC09.GH3-14.a  | .....                                                       |
| BnaA03.GH3-15.a  | .....                                                       |
| BnaC03.GH3-15.a  | .....                                                       |
| BnaAX.GH3-16.a   | .....                                                       |
| BnaC02.GH3-16.a  | .....                                                       |
| BnaA07.GH3-17.a  | .....                                                       |
| BnaA08.GH3-17.b  | .....                                                       |
| BnaA09.GH3-17.c  | .....                                                       |
| BnaC08.GH3-17.a  | .....                                                       |
| BnaCX.GH3-17.b   | .....                                                       |
| BnaCX.GH3-17.c   | .....                                                       |
| BnaA05GH3-18.a   | .....                                                       |
| BnaCX.GH3-18.a   | .....                                                       |
| BnaA06.GH3-19.a  | .....                                                       |
| BnaA09.GH3-19.b  | .....                                                       |
| consensus>70     | .....                                                       |

|                 | 1            | 10                        |
|-----------------|--------------|---------------------------|
| AtGH3-1         | MAVDSNLSSPL  | GP                        |
| AtGH3-2         | MAVDSPLQSR   | MVSA                      |
| AtGH3-3         | MTVDSALRSP   | MMHS                      |
| AtGH3-4         | MAVDSLQSGM   | ASP                       |
| AtGH3-5         | MPEAPKKESL   | EVFDL                     |
| AtGH3-6         | MPEAPKIAALE  | VSDE                      |
| AtGH3-7         | MSLTS        |                           |
| AtGH3-8         | MSL          |                           |
| AtGH3-9         | MDVMK        |                           |
| AtGH3-10        | ME           |                           |
| AtGH3-11        | MDALKHKRAFK  | MLEK                      |
| AtGH3-12        | MK           |                           |
| AtGH3-13        | MLPK         |                           |
| AtGH3-14        | EKNTKSGNSS   | TLRHRTRFRQTTHFVCFLLRQGKWP |
| AtGH3-15        | ELIYFARTKQSL | VSQKAAQAIMLPK             |
| AtGH3-16        | MLPK         |                           |
| AtGH3-17        | MTPFICTERERD | GSDPIHCSQRKDNRKAAIMLPK    |
| AtGH3-18        | MIPS         |                           |
| AtGH3-19        |              |                           |
| BraX.GH3-1.a    | MAVDSSLS     | SSPL.GP                   |
| BraX.GH3-2.a    | MAVDSPLQSR   |                           |
| BraA09.GH3-3.a  | MIVDLALKSP   | MIHT                      |
| BraA01.GH3-5.a  | MPEAPKNESL   | EVFDL                     |
| BraA03.GH3-5.b  | MPEAPKYESL   | DAFDL                     |
| BraA02.GH3-6.a  | MPEAPKIEALE  | VS                        |
| BraA03.GH3-6.b  | MPEAPELA     | VSDQ                      |
| BraA06.GH3-7.a  | MSI          |                           |
| BraA08.GH3-7.b  | MSVIS        |                           |
| BraA02.GH3-8.a  | MSL          |                           |
| BraA03.GH3-8.b  | MSM          |                           |
| BraA03.GH3-8.c  | M            |                           |
| BraA03.GH3-8.d  | MN           |                           |
| BraA06.GH3-8.e  |              |                           |
| BraA06.GH3-8.f  |              |                           |
| BraA09.GH3-8.g  |              |                           |
| BraA09.GH3-8.h  |              |                           |
| BraA10.GH3-8.i  |              |                           |
| BraA09.GH3-10.a | MLGLRTL      | LLVFCIAVVP                |
| BraA03.GH3-11.a | MGAKSKTKQ    | TFSFEITPKLGDVDYIYFLYG     |
| BraA04.GH3-11.b | RMLEKK       |                           |
| BraA05.GH3-11.c | MLEKK        |                           |
| BraA02.GH3-12.a | MLEKK        |                           |
| BraA03.GH3-12.b | MN           |                           |
| BraA06.GH3-12.c | MK           |                           |
| BraA10.GH3-12.d | MSI          |                           |
| BraA10.GH3-14.a | MK           |                           |
| BraA03.GH3-15.a | MLPK         |                           |
| BraA07.GH3-15.b | MVIGCGLP     | STMAAIMLPK                |
| BraA02.GH3-16.a | MLTK         |                           |
| BraA07.GH3-17.a | MLPR         |                           |
| BraA09.GH3-17.b |              |                           |
| BraAX.GH3-17.c  | MIPS         |                           |
| BraA04.GH3-19.a | MMIPS        |                           |
| BraA06.GH3-19.b |              |                           |
| BraA09.GH3-19.c |              |                           |
| BraA09.GH3-19.d |              |                           |
| BraAX.GH3-19.e  |              |                           |
| BolC09.GH3-1.a  | MAVDSSLS     | SSPL.GP                   |
| BolC01.GH3-2.a  | MAVDSPLQSR   |                           |
| BolC08.GH3-3.a  | MIVDLALKSP   | MIHS                      |
| BolC01.GH3-5.a  | MPEAPKNESL   | EVFDL                     |
| BolC07.GH3-5.b  | MPEAPKYESL   | DAFDL                     |
| BolC02.GH3-6.a  | MPEAPKIEALE  | VS                        |
| BolC03.GH3-6.b  | MPEAPELAV    | SELS                      |
| BolC06.GH3-7.a  | MSI          |                           |
| BolC01.GH3-8.a  | M            |                           |
| BolC03.GH3-8.b  | MPC          |                           |
| BolC07.GH3-8.c  | M            |                           |
| BolC08.GH3-8.d  |              |                           |
| BolC09.GH3-8.e  |              |                           |
| BolC09.GH3-10.a | ME           |                           |
| BolC03.GH3-11.a | MLEKK        |                           |
| BolC04.GH3-11.b | MLEKK        |                           |
| BolCX.GH3-11.c  | MLEKK        |                           |
| BolC03.GH3-12.a | MK           |                           |
| BolC09.GH3-12.b | MN           |                           |
| BolC09.GH3-14.a | MLPK         |                           |
| BolC03.GH3-15.a | MLPK         |                           |
| BolCX.GH3-16.a  | MLPR         |                           |
| BolC07.GH3-17.a | MIPS         |                           |
| BolC08.GH3-17.b | MIPS         |                           |
| BolC08.GH3-19.a | MVGVSGLQ     | TSK                       |
| BnaA09R.GH3-1.a | MAVDSSLS     | SSPL.GP                   |
| BnaCX.GH3-1.a   | MAVDSSLS     | SSPL.GP                   |
| BnaA01.GH3-2.a  | MAVDSPLQSR   |                           |
| BnaC01.GH3-2.a  | MAVDSPLQSR   |                           |
| BnaA09.GH3-3.a  | MIVDLALKSP   | MIHT                      |
| BnaC08.GH3-3.a  | MIVDLALKSP   | MIHS                      |
| BnaA01.GH3-5.a  | MPEAPKNESL   | EVFDL                     |
| BnaA03.GH3-5.b  | MPEAPKYESL   | DAFDL                     |
| BnaC01.GH3-5.a  | MPEAPKNESL   | EVFDL                     |
| BnaC07.GH3-5.b  | MPEAPKYESL   | DAFDL                     |
| BnaA03.GH3-6.a  | MPEAPELAV    | SEVS                      |
| BnaAX.GH3-6.b   | MPEAPKIEA    | FEVS                      |
| BnaC03.GH3-6.a  | MPEAPELAV    | SELS                      |
| BnaCX.GH3-6.b   | MPEAPKIEA    | LEVSDQ                    |
| BnaA06.GH3-7.a  | MSI          |                           |
| BnaA08.GH3-7.b  | MSVIS        |                           |
| BnaC06.GH3-7.a  | MSI          |                           |
| BnaA03.GH3-8.a  | MSM          |                           |
| BnaA03.GH3-8.b  | M            |                           |
| BnaA03.GH3-8.c  | MN           |                           |
| BnaA06.GH3-8.d  |              |                           |

|                  |                                                                |
|------------------|----------------------------------------------------------------|
| BnaA06.GH3-8.e   | .....                                                          |
| BnaA09.GH3-8.f   | .....                                                          |
| BnaA09.GH3-8.g   | .....                                                          |
| BnaAX.GH3-8.h    | .....                                                          |
| BnaAX.GH3-8.i    | .....                                                          |
| BnaC01.GH3-8.a   | .....M                                                         |
| BnaC02.GH3-8.b   | .....MSL                                                       |
| BnaC02.GH3-8.c   | .....MSL                                                       |
| BnaC02.GH3-8.d   | .....MSL                                                       |
| BnaC07.GH3-8.e   | .....M                                                         |
| BnaC09.GH3-8.f   | .....                                                          |
| BnaCX.GH3-8.g    | .....MS                                                        |
| BnaA05.GH3-9.a   | .....MDVVKI                                                    |
| BnaC04.GH3-9.a   | .....MDVLKF                                                    |
| BnaA03.GH3-10.a  | .....ME                                                        |
| BnaA09.GH3-10.b  | .....ME                                                        |
| BnaC09.GH3-10.a  | .....ME                                                        |
| BnaA03.GH3-11.a  | .....MGAKSKTKQTFSEDIKLGRLATSITFTFSMVARSNNNIRMLEKK              |
| BnaA04R.GH3-11.b | .....NNIRMLEKK                                                 |
| BnaA05.GH3-11.c  | .....MLEKK                                                     |
| BnaC04.GH3-11.a  | YEDKEMSEQTKFSNSLFFFSLYKIATSSDFSESLEKICFLYLSPPPSFIARSNNNIRMLEKK |
| BnaCX.GH3-11.b   | .....MLEKK                                                     |
| BnaA02.GH3-12.a  | .....MD                                                        |
| BnaA03.GH3-12.b  | .....MK                                                        |
| BnaA06.GH3-12.c  | .....MSI                                                       |
| BnaA10.GH3-12.d  | .....MK                                                        |
| BnaC02.GH3-12.a  | .....MN                                                        |
| BnaC03.GH3-12.b  | .....MLLKSSLTLNKREASMK                                         |
| BnaC09.GH3-12.c  | .....MN                                                        |
| BnaA10.GH3-14.a  | .....MLPK                                                      |
| BnaC09.GH3-14.a  | .....MLPK                                                      |
| BnaA03.GH3-15.a  | .....MVIGCGLPSTMAAIMLPK                                        |
| BnaC03.GH3-15.a  | .....MVIGCDLPSTMSAIMLPK                                        |
| BnaAX.GH3-16.a   | .....NYSVTGTRTRFRHTTTPFVCFIQYLLNLKSPSFFFCYCRTLQIIKNQQTMLPR     |
| BnaC02.GH3-16.a  | .....MLPR                                                      |
| BnaA07.GH3-17.a  | .....MIPS                                                      |
| BnaA08.GH3-17.b  | .....MIPS                                                      |
| BnaA09.GH3-17.c  | .....MIPS                                                      |
| BnaC08.GH3-17.a  | .....                                                          |
| BnaCX.GH3-17.b   | .....MIPS                                                      |
| BnaCX.GH3-17.c   | .....                                                          |
| BnaA05GH3-18.a   | .....                                                          |
| BnaCX.GH3-18.a   | .....                                                          |
| BnaA06.GH3-19.a  | .....                                                          |
| BnaA09.GH3-19.b  | .....MVGVSVLQTSK                                               |
| consensus>70     | .....                                                          |

|                 | 20              | 30                             | 40 | 50 |
|-----------------|-----------------|--------------------------------|----|----|
| AtGH3-1         | PACEKDAKALRFIE  | EMTRNADTVQENLLAEILARNADTEYLRR  |    |    |
| AtGH3-2         | TTSEKDVKALKFIE  | EMTRNPDSDVQEKVLGEILTRNSNTEYLKR |    |    |
| AtGH3-3         | P.STKDVKALRFIE  | EMTRNVDFVQKKVIREILSRNSDTEYLKR  |    |    |
| AtGH3-4         | TTSETEVKALKFIE  | EITRNPDSVQEKVLGEILSRNSNTEYLKR  |    |    |
| AtGH3-5         | TLDQKNKQKQLQIE  | ELTSNADQVQRRVLEEILTRNADVEYLRR  |    |    |
| AtGH3-6         | SLAEKNKNNKLFQIE | DVTINADDVQRRVLEEILSRNADVEYLKR  |    |    |
| AtGH3-7         | DLSEKSSDDMKVLE  | DLTSNVTQIQDNVLEEILTLNANTNYLQK  |    |    |
| AtGH3-8         | CSDLTEKLDIEILE  | DLTSNVKQIQDNVLEEILTLNANTEYLRR  |    |    |
| AtGH3-9         | ...LDHDSVLKELE  | RITSKAAEVQDNILRGILERNKDTEYLSK  |    |    |
| AtGH3-10        | TVFAGHDDVIGWFE  | HVSENAACKVQSETLRRILELNSGVEYLKR |    |    |
| AtGH3-11        | VETFDMMNRVIDEFD | EMTRNAHQVQKQTLKEILLKNQSAIYLQN  |    |    |
| AtGH3-12        | PIFDINETTFKQLK  | DLTSNVKS IQDNLLIEITPNTKTEYLQR  |    |    |
| AtGH3-13        | FDLTDPKASLSLE   | DVTINVTQIQDSILEAVLSRNAHTEYLKG  |    |    |
| AtGH3-14        | FDPTDQKACLSLE   | DVTINVKQIQDSVLEAILSRNAHTEYLSG  |    |    |
| AtGH3-15        | FDPTNQKACLSLE   | DLTINVKQIQDSVLEAILSRNAQTEYLRG  |    |    |
| AtGH3-16        | FDPTNPLATMSVLE  | DVTINVKQIQDSVLEAILSRNSQTEYLRG  |    |    |
| AtGH3-17        | YDPNDTEAGLKLE   | DLTTNAEAIQEQVLHQILSONSGTQYLRA  |    |    |
| AtGH3-18        | ...MMNPSLNLMDLE | ELTSNAKQIQEDVLEEILTLNANTEYLHR  |    |    |
| AtGH3-19        | ...MSLSVELKDLE  | VLTTNAKQIQDDVLKEILTLNANTEYLKR  |    |    |
| BraX.GH3-1.a    | PACEKDAKALRFIE  | EMTRNADTVQENLLAEILRRNAEATEYLRR |    |    |
| BraX.GH3-2.a    | TTSEKDVKALSFIE  | EMTRNPDSDVQEKVLGEILSRNSGTEYLKR |    |    |
| BraA09.GH3-3.a  | PQSDKDLKALRFIE  | EMTRKVDVFQKKVKEILSRNSETEYLKR   |    |    |
| BraA01.GH3-5.a  | TLDEKNKRRRLQIE  | ELTSNADQVQRRVLEEILTRNADVEYLRR  |    |    |
| BraA03.GH3-5.b  | TLDEKNKRRRLQIE  | ELTSNADQVQRRVLEEILTRNADVEYLRR  |    |    |
| BraA02.GH3-6.a  | TLAEKNKNNRLQFIE | EVTSNADDVQRRVLEEILSRNADVEYLKR  |    |    |
| BraA03.GH3-6.b  | ILEEKNKNNKLFQIE | EVTSNADQVQRRVLEEILSRNADVEYLKR  |    |    |
| BraA06.GH3-7.a  | ISYYNEEEKGKYLE  | DLTWNVKQIQDDLLKEILTLNSGTEYLQN  |    |    |
| BraA08.GH3-7.b  | VLTEKANDKKILE   | DLTSNVKQIQDNVLEEILTLNTNTEYLQR  |    |    |
| BraA02.GH3-8.a  | CSDLCDKLDENVLE  | ELASNVKQIQDNVLEEILTLNAGTEYLRR  |    |    |
| BraA03.GH3-8.b  | WADLSDKLDKLVLE  | DLTSNVKQIQDDVLKEILTLNANTEYLRP  |    |    |
| BraA03.GH3-8.c  | INLTEEDAGLAMLE  | KLTSNVKQIQDAVLKEILTC DANTEYLRS |    |    |
| BraA03.GH3-8.d  | NLTKEEEAGLAVLE  | NLTSNVKQIQDEVLKEILTC DANTEYLRS |    |    |
| BraA06.GH3-8.e  | ...MSLGCDLTVLE  | ELTSNAKQIQEDVLNKKILKANANTEYLQR |    |    |
| BraA06.GH3-8.f  | ...MSLDCDLTVLE  | ELTSNAKQIQDDVLT KILKANANTEYLQR |    |    |
| BraA09.GH3-8.g  | ...MELM         | NLTSNVKQIQDDVLKEILTLNANTEYLRG  |    |    |
| BraA09.GH3-8.h  | ...MSLGCDLSVLE  | ELTSNAKQIQDDVLT KILKANTNTEYLSR |    |    |
| BraA10.GH3-8.i  | ...MDLK         | KLTSNVKHIQDDVLKEILTLNAKTEYLRG  |    |    |
| BraA09.GH3-10.a | PAEAGHADVIGWFE  | HVSEKACKAQRETILRRILELNSRVEYLKR |    |    |
| BraA03.GH3-11.a | VETFNMMNRVIDEFE | EMTRNADQVQKQTLKEILLKNQSAIYLQN  |    |    |
| BraA04.GH3-11.b | VETFNMMNRVIDEFE | EMSRNADQVQIQTLKDI LLKNHSAIYLKN |    |    |
| BraA05.GH3-11.c | AETFNMMNRVIDEFD | EMTRNADQVQKQTLKEILLKNKSAIYLRN  |    |    |
| BraA02.GH3-12.a | PNSDNNQRWEAKLK  | DLTSNVQIQDNLLIEILTPNLNTEYLQR   |    |    |
| BraA03.GH3-12.b | PISNNNERWEKLLK  | DLTFNVKQIQDKLLEEILTPNLKTEYLQR  |    |    |
| BraA06.GH3-12.c | ISDFNDEEEKVLE   | DLTSNVKQIQDDLLKEILTLNSGTEYLSQ  |    |    |
| BraA10.GH3-12.d | PISNNDETWDATLK  | DLTSNVKEIQDNVLEEITP NLKTEYLQR  |    |    |
| BraA10.GH3-14.a | FDPTANHKACLSVLE | DVTINAKQIQDSVLEAILSRNAKTEYLRG  |    |    |
| BraA03.GH3-15.a | FDPTNSKACLSILE  | DVTINAKQIQDSVLEAILSRNAQTEYLKG  |    |    |
| BraA07.GH3-15.b | FDPTNQKACLSLE   | DITSNANQIQDSVLEAILTRNAHTEYLRG  |    |    |
| BraA02.GH3-16.a | FDPTNPLACMSVLE  | DVTSNAKQIQDSVLEAILSRNAQTEYLKG  |    |    |
| BraA07.GH3-17.a | YDPNDTEAGLKLE   | DLTTNAEV IQEQVLHQILSONCETQYLQA |    |    |
| BraAX.GH3-17.c  | YDPNDTEAGLQLE   | DLTTNADA IQEQVLHQILSONSETEYLRS |    |    |
| BraA04.GH3-19.a | ...MNQNSELKALE  | KLSSNAKQIQEDMLEEILRSSANTTEYLRR |    |    |
| BraA06.GH3-19.b | ...MSLGCDLTVLE  | ELTSNAKQIQDDVLNKKILKANANTEYLKR |    |    |
| BraA09.GH3-19.c | ...MSLGCDLSVLE  | ELTSNAKQIQDDVLT KILKANANTEYLSR |    |    |
| BraA09.GH3-19.d | ...MRLGCDLSVLE  | ELTSNAKQIQDDVLNKKILKANANTEYLSR |    |    |
| BraAX.GH3-19.e  | ...MSSIVELSSLE  | ELTLNAEQIQDDLLKEILRLNSNTEYLRR  |    |    |
| BolC09.GH3-1.a  | PACEKDAKALRFIE  | EMTRNADTVQENLLAEILRRNAEATEYLRR |    |    |
| BolC01.GH3-2.a  | TTSEKDAKALSFIE  | EMTRNPDSDVQEKVLGEILSRNSGTEYLKR |    |    |
| BolC08.GH3-3.a  | PQSDKDLKALRFIE  | EMTRNVDFVQKKVKEILSRNSETEYLKR   |    |    |
| BolC01.GH3-5.a  | TLDEKNKRRRLQIE  | ELTSNADQVQRRVLEEILTRNADVEYLKR  |    |    |
| BolC07.GH3-5.b  | TLDEKNKRRRLQIE  | ELTSNADQVQRRVLEEILTRNADVEYLRR  |    |    |
| BolC02.GH3-6.a  | TLAEKNKNNRLQFIE | EVTSNADDVQRRVLEEILSRNADVEYLKR  |    |    |
| BolC03.GH3-6.b  | TLAEKNKNNKLFQIE | EVTSNADDVQRRVLEEILSRNADVEYLKR  |    |    |
| BolC06.GH3-7.a  | ISYYNEEEKGKYLE  | DLTWNVKQIQDDLLKEILTLNSGTEYLSQ  |    |    |
| BolC01.GH3-8.a  | NLTDDKDVAMSLLE  | DLTSNVKQIQDEVLEEILRC DANTEYLSQ |    |    |
| BolC03.GH3-8.b  | LHDAIDVNKIRVIE  | RLDVQCCQIQDDVLKEILLT SANTEYLAP |    |    |
| BolC07.GH3-8.c  | INLTEEDAGLAVLE  | KLTSNVKQIQDAVLKEILTC DANTEYLRS |    |    |
| BolC08.GH3-8.d  | ...MSQGCDSLILE  | ELTSNAKKRQDNVLNKKILKANANTEYLSR |    |    |
| BolC09.GH3-8.e  | ...MPEQNLYL     | ...MPEQNLYL                    |    |    |
| BolC09.GH3-10.a | PAEAGHADVIGWFE  | HVSEKACKAQRETILRRILELNSGVEYLKR |    |    |
| BolC03.GH3-11.a | VENFNMMNRVIDEFE | EMTRNADQVQKQTLKEILLKNKSAIYLQN  |    |    |
| BolC04.GH3-11.b | FETFNMMNRVIDEFE | EMSRNADQVQIQTLKDI LLKSQSAIYLKN |    |    |
| BolCX.GH3-11.c  | AETFNMMNRVIDEFD | EMTRNADQVQKQTLKEILLKNKSAIYLRN  |    |    |
| BolC03.GH3-12.a | PISNNNERWEKLLK  | DLTSNVKQIQDNLLIEILTPNLKTEYLQR  |    |    |
| BolC09.GH3-12.b | PNSDNNQRWEAKLK  | DLTSNVQIQDNLLKEILTPNLNTEYLQR   |    |    |
| BolC09.GH3-14.a | FDPTANHKACLSVLE | DVTINAKQIQDSVLEAILSRNAKTEYLRG  |    |    |
| BolC03.GH3-15.a | FDPTNSKACLSILE  | DVTINAKQIQDSVLEAILSRNAQTEYLKG  |    |    |
| BolCX.GH3-16.a  | FDPTNPLACMSVLE  | DVTSNAKQIQDSVLEAILSRNAQTEYLKG  |    |    |
| BolC07.GH3-17.a | YDPNDTEAGLKLE   | DLTTNAEAIQEQVLHEILSONSGTQYLRA  |    |    |
| BolC08.GH3-17.b | YDPNDTEAGLKLE   | DLTTNADA IQEQVLHQILSONSETEYLRS |    |    |
| BolC08.GH3-19.a | IANMSQGCDSLILE  | ELTSNAKKIQDDVLT KILKANANTEYLSL |    |    |
| BnaA09R.GH3-1.a | PACEKDAKALRFIE  | EMTRNADTVQENLLAEILRRNAEATEYLRR |    |    |
| BnaCX.GH3-1.a   | PACEKDAKALRFIE  | EMTRNADTVQENLLAEILRRNAEATEYLRR |    |    |
| BnaA01.GH3-2.a  | TTSEKDVKALSFIE  | EMTRNPDSDVQEKVLGEILSRNSGTEYLKR |    |    |
| BnaC01.GH3-2.a  | TTSEKDAKALSFIE  | EMTRNSDSVQEKVLGEILSRNSGTEYLKR  |    |    |
| BnaA09.GH3-3.a  | PQSDKDLKALRFIE  | EMTRNVDFVQKKVKEILSRNSETEYLKR   |    |    |
| BnaC08.GH3-3.a  | PQSDKDLKALRFIE  | EMTRNVDFVQKKVKEILSRNSETEYLKR   |    |    |
| BnaA01.GH3-5.a  | TLDEKNKRRRLQIE  | ELTSNADQVQRRVLEEILTRNADVEYLRR  |    |    |
| BnaA03.GH3-5.b  | TLDEKNKRRRLQIE  | ELTSNADQVQRRVLEEILTRNADVEYLRR  |    |    |
| BnaC01.GH3-5.a  | TLDEKNKRRRLQIE  | ELTSNADQVQRRVLEEILTRNADVEYLKR  |    |    |
| BnaC07.GH3-5.b  | TLDEKNKRRRLQIE  | ELTSNADQVQRRVLEEILTRNADVEYLRR  |    |    |
| BnaA03.GH3-6.a  | ILEEKNKNNKLFQIE | EVTSNADQVQRRVLEEILSRNADVEYLKR  |    |    |
| BnaAX.GH3-6.b   | TLAEKNKNNRLQFIE | EVTSNADDVQRRVLEEILSRNADVEYLKR  |    |    |
| BnaC03.GH3-6.a  | SLAEKNKNNKLFQIE | EVTSNADDVQRRVLEEILSRNADVEYLKR  |    |    |
| BnaCX.GH3-6.b   | TLAEKNKNNRLQIE  | EVTSNADDVQRRVLEEILSRNADVEYLKR  |    |    |
| BnaA06.GH3-7.a  | ISYYNEEEKGKYLE  | DLTWNVKQIQDDLLKEILTLNSGTEYLQN  |    |    |
| BnaA08.GH3-7.b  | VLTEKANDKKILE   | DLTSNVKQIQDNVLEEILTLNTNTEYLQR  |    |    |
| BnaC06.GH3-7.a  | ISYYNEEEKGKYLE  | DLTWNVKQIQDDMLKEILTLNSGTEYLQN  |    |    |
| BnaA03.GH3-8.a  | WADLSDKLDKLVLE  | DLTSNVKQIQDDVLKEILTLNANTEYLRP  |    |    |
| BnaA03.GH3-8.b  | INLTEEDAGLAMLE  | KLTSNVKQIQDAVLKEILTC DANTEYLRS |    |    |
| BnaA03.GH3-8.c  | NLTKEEEAGLAVLE  | NLTSNVKQIQDEVLKEILTC DANTEYLRS |    |    |
| BnaA06.GH3-8.d  | ...MNLGCDLTVLE  | ELTSNAKQIQDDVLNKKILKANANTEYLQR |    |    |

|                  |            |       |                            |                   |                   |
|------------------|------------|-------|----------------------------|-------------------|-------------------|
| BnaA06.GH3-8.e   | ...MSLDCD  | LTVLE | ELTSNAKQIQDDVLT            | KILKANANTEYLQR    |                   |
| BnaA09.GH3-8.f   | ...MSLSCD  | LSVLE | ELTSNAKQIQDDVLT            | KILKANANTEYLSR    |                   |
| BnaA09.GH3-8.g   | ...MSQRCD  | LSVLE | ELTSNAKQIQDDVLT            | KILKSSANTEYLSR    |                   |
| BnaAX.GH3-8.h    | .....      | ..... | .....                      | .....             |                   |
| BnaAX.GH3-8.i    | ...MSQGCD  | LSVLE | ELTSNAKQIQDDVLT            | KILKANANTEYLSR    |                   |
| BnaC01.GH3-8.a   | NLTLDKDVAM | SLLE  | DLTSNVKQIQDEVLEE           | ILRC DANTEYLSQ    |                   |
| BnaC02.GH3-8.b   | CSDLCDKLD  | ENVLE | ELTSNVKQIQDNLVLEE          | ILTLNAGTEYLRR     |                   |
| BnaC02.GH3-8.c   | CSDLCDKLD  | ENVLE | ELTSNVKQIQDNLVLEE          | ILTLNAGTEYLRR     |                   |
| BnaC02.GH3-8.d   | CSDLCDKLD  | ENVLE | ELTSNVKQIQDNLVLEE          | ILTLNAGTEYLRR     |                   |
| BnaC07.GH3-8.e   | INLTEDDAG  | LAVLE | KLTSNVKQIQDAVLKE           | ILTC DANTEYLSR    |                   |
| BnaC09.GH3-8.f   | .....      | ..... | .....                      | .....             |                   |
| BnaCX.GH3-8.g    | RTNMSLDCD  | LTVLE | ELTSNAKQIQDDVLT            | KILKANANTEYLSR    |                   |
| BnaA05.GH3-9.a   | DYNYKGDNAL | KELE  | RITSKAAEQVQDNIL            | CGILEONKDTQYLSK   |                   |
| BnaC04.GH3-9.a   | DYNHKGDNAL | KELE  | RITSKAAEQVQDNIL            | SGILERNKDTQYLSK   |                   |
| BnaA03.GH3-10.a  | TAEAGHADV  | IGWFE | HVSENAKQIQRETL             | LRRIELNCGVDYLRK   |                   |
| BnaA09.GH3-10.b  | PAEAGHADV  | IGWFE | HVSEKASKAQSETL             | LRRIELNLSRVEYLRK  |                   |
| BnaC09.GH3-10.a  | PAEAGHADV  | IGWFE | HVSEKACKTQRETL             | LRRIELNLSGVEYLRK  |                   |
| BnaA03.GH3-11.a  | VETFNMMNRV | IDEFE | EMTRNADQVQKQTL             | KEILHKNSAIYLRN    |                   |
| BnaA04R.GH3-11.b | VETFNMMNRV | IDEFE | EMSRNADQVQIQTL             | KDILLNKNSAIYLRN   |                   |
| BnaA05.GH3-11.c  | AETFNMMNRV | IDD   | FD                         | EMTRNADQVQKQTL    | KEILHKNSAIYLRN    |
| BnaC04.GH3-11.a  | FETFNMMNRV | IDEFE | EMSRNADQVQIQTL             | KDILLNKNSAIYLRN   |                   |
| BnaCX.GH3-11.b   | VENFNMMNRV | IDEFE | EMTRNADQVQKQTL             | KEILHKNSAIYLRN    |                   |
| BnaA02.GH3-12.a  | PNSDNNQRWE | EAKL  | KL                         | DLTSNVQIQDNLLEE   | ILTPNLNTEYLSR     |
| BnaA03.GH3-12.b  | PISNNNERWE | EAKL  | KL                         | DLTFNVKEIQDKLEE   | ILTPNLNTEYLSR     |
| BnaA06.GH3-12.c  | ISDFNDEEKE | EVLE  | LE                         | DLTSNVKQIQDDLKE   | ILTLNSGTEYLSR     |
| BnaA10.GH3-12.d  | PISNNDETWD | ATL   | KL                         | DLTSNVKEIQDNLVLEE | ILTPNLNTEYLSR     |
| BnaC02.GH3-12.a  | PNSDNNQRWE | EAKL  | KL                         | DLTSNVQIQDNLLEE   | ILTPNLNTEYLSR     |
| BnaC03.GH3-12.b  | PISNNNERWE | EAKL  | KL                         | DLTFNVKQIQDNLLEE  | ILTPNLNTEYLSR     |
| BnaC09.GH3-12.c  | PNSDNNQRWE | EAKL  | KL                         | DLTSNVQIQDNLLEE   | ILTPNLNTEYLSR     |
| BnaA10.GH3-14.a  | FDPANHKACL | SVLE  | LE                         | DVTINAKQIQDSVLE   | AILSRNAKTEYLRG    |
| BnaC09.GH3-14.a  | FDPANHKACL | SVLE  | LE                         | DVTINAKQIQDSVLE   | AILSRNAKTEYLRG    |
| BnaA03.GH3-15.a  | FDPTNSKACL | SILE  | LE                         | DVTINAKQIQDSVLE   | AILSRNAKTEYLRG    |
| BnaC03.GH3-15.a  | FDPTNSKACL | SILE  | LE                         | DVTINAKQIQDSVLE   | AILSRNAKTEYLRG    |
| BnaAX.GH3-16.a   | FDPTNPLAC  | MSVLE | LE                         | DVTSNAKQIQDSVLE   | AILSRNAKTEYLRG    |
| BnaC02.GH3-16.a  | FDPTNPLAC  | MSVLE | LE                         | DVTSNAKQIQDSVLE   | AILSRNAKTEYLRG    |
| BnaA07.GH3-17.a  | YDPNDTEAG  | LKLE  | LE                         | DLTSNAEAIEQV      | VLHEILSONSGTQYLR  |
| BnaA08.GH3-17.b  | YDPNDTEAG  | LKLE  | LE                         | DLTTNADAIQEQV     | VLHQILSONSGTEYLSR |
| BnaA09.GH3-17.c  | YDPNDTEAG  | LKLE  | LE                         | DLTTNAEVIQEQV     | VLHQILSONSGTQYLR  |
| BnaC08.GH3-17.a  | .....      | ..... | .....                      | .....             | .....             |
| BnaCX.GH3-17.b   | YDPNDTEAG  | LKLE  | LE                         | DLTSNAEAIEQV      | VLHEILSONSGTQYLR  |
| BnaCX.GH3-17.c   | .....      | ..... | .....                      | .....             | .....             |
| BnaA05GH3-18.a   | ...MSSIVEL | SSLE  | LE                         | ELTLNAEQIQDDLLE   | KILRLNSNTEYLSR    |
| BnaCX.GH3-18.a   | ...MSQGCD  | LSVLE | LE                         | ELTSNAKQIQDDVLT   | KILKANANTEYLSR    |
| BnaA06.GH3-19.a  | ...MSLGCD  | LTVLE | LE                         | ELTSNAKQIQDDVLT   | KILKANANTEYLSR    |
| BnaA09.GH3-19.b  | IANMSLGCD  | LSVLE | LE                         | ELTSNAKQIQDDVLT   | KILKANANTEYLSR    |
| consensus>70     | .....e     | ..... | elt.n.qiq...l.il..n.teyl.. |                   |                   |

|                 | 60      | 70         | 80             | 90            | 100                |                   |
|-----------------|---------|------------|----------------|---------------|--------------------|-------------------|
| AtGH3-1         | F...NLG | GATDR..DT  | FKTKLPVITYEDL  | QPEIQRIADGDRS | SPILSAHPITSEFLTSSG |                   |
| AtGH3-2         | F...DLG | VVDR..KT   | FKSKVPVVITYEDL | KPEIQRISNGDRS | SPILSSHPIITEFLTSSG |                   |
| AtGH3-3         | F...GLK | GFTDR..KT  | FKTKVPVVITYDDI | KPEIQRIANGDRS | SMILSSYPITEFLTSSG  |                   |
| AtGH3-4         | F...DLN | GAVDR..KS  | FKSKVPVVITYEDL | KTDIQRISNGDRS | SPILSSHPITEFLTSSG  |                   |
| AtGH3-5         | H...DLN | GRTDR..ET  | FKNIMPVITYEDI  | QPEINRIANGDKS | SPILSSKPISEFLTSSG  |                   |
| AtGH3-6         | H...GLE | GRTDR..ET  | FKHIMPVITYEDI  | QPEINRIANGDKS | QVLCSPNPISEFLTSSG  |                   |
| AtGH3-7         | F...FLG | SFDDK..ES  | FKKNVPVVITYEDV | KPYIERVVNGEFS | SNVISARPIITGFVLSTG |                   |
| AtGH3-8         | F...LHG | SSSK..EL   | FKKNVPVVITYEDV | KPFIDRVTNGEFS | SDIISGNPITGFLLSSG  |                   |
| AtGH3-9         | Y...MNG | SKDV..LE   | FKRAVPIIYKDIY  | PYIQRIANGEDS  | SSLITGHSITEILCSSG  |                   |
| AtGH3-10        | WLG     | TVDVEKMDDY | TLETITSLVP     | IVSHADLD      | PYIQRIADGETS       | SPLLTQEPITVLSLSSG |
| AtGH3-11        | C...GLN | G.NATDPEEA | FKSMVPLVTDVLE  | EPYIKRMVDGDT  | SPILTGHPVPAISLSSG  |                   |
| AtGH3-12        | F...LID | REFDK..EL  | FKKNVPIVSYEDI  | KPYLDRVVNGESS | DVISARTITGFLSSG    |                   |
| AtGH3-13        | F...LNG | QVDDK..QT  | FKKNVPVITYEDI  | KPYINRIANGEAS | DLICDRPISLLVMSSG   |                   |
| AtGH3-14        | F...LNG | QADK..KS   | FKKNVPVVITYEDI | KPYIDRIANGEFS | DLICDRPISVLLTSSG   |                   |
| AtGH3-15        | F...LNG | QVDDK..QN  | FKKNVPVVITYEDI | RSYIDRIANGEFS | DLICDRPISVLLTSSG   |                   |
| AtGH3-16        | F...LTG | QLDDK..QS  | FKKNVPIVITYEDI | KPHIDRIANGEFS | DLICDRPISLLLATG    |                   |
| AtGH3-17        | F...LDG | EADKNQQS   | FKKNVPVVNYDDV  | KPFIQRIADGES  | SDIVSAQPIITELLSSG  |                   |
| AtGH3-18        | F...LHG | SSDDK..VL  | FKKNVPVVITYDDV | KPYIERVANGEP  | SDVISGGPITMFLRSTG  |                   |
| AtGH3-19        | F...LDG | SSDDK..EL  | FKKNVPVVSNDV   | KPYIERVANGEP  | SDVISGGTITRFVQSTG  |                   |
| BraX.GH3-1.a    | F...NLG | GATDR..DT  | FKSKLPITITYEDL | QPEIQRIADGDRS | SPILSAHPITSEFLTSSG |                   |
| BraX.GH3-2.a    | F...GLN | GSTDR..KT  | FKTKVPVVITYEDL | KPEIQRISNGDRS | SPILSSHPIITEFLTSSG |                   |
| BraA09.GH3-3.a  | F...GLK | GSTDR..KT  | FKKNVPVITYDDI  | KPEIQRIANGDRS | SMILSSHPITEFLTSSG  |                   |
| BraA01.GH3-5.a  | H...DLN | GRTDR..ET  | FKNIMPVITYEDI  | QPEINRIANGDKS | SPILSSKPISEFLTSSG  |                   |
| BraA03.GH3-5.b  | H...DLN | GRTDR..ET  | FKNIMPVITYEDI  | QPEINRIANGDKS | SPILSSKPISEFLTSSG  |                   |
| BraA02.GH3-6.a  | H...GLQ | GRTDR..ET  | FKHVPVVITYEDI  | QPEINRIANGDT  | SQILCSPPISEFLTSSG  |                   |
| BraA03.GH3-6.b  | H...GLQ | GRTDR..ET  | FKHVPVVITYEDI  | QPEINRIANGDKS | QILCSPPISEFLTSSG   |                   |
| BraA06.GH3-7.a  | F...LHG | SSAK..EL   | FKKNLPVITYKDV  | KPYIDRVANGESS | SNISALPITNFFNSSG   |                   |
| BraA08.GH3-7.b  | F...FHG | KFDK..EI   | FKKNVPVGYTEDV  | KPYIQRVANGEP  | SNVISTRPIITGFLSSG  |                   |
| BraA02.GH3-8.a  | F...LHG | SSDDK..EL  | FKKNVPVITYEDV  | KLYIDRVANGEP  | FDVISGKPIITGFLSSG  |                   |
| BraA03.GH3-8.b  | F...LHG | SSDDK..EL  | FKKNVPVITYDDV  | KLFIDRVANGEP  | FDVISGKPIITGFLSSG  |                   |
| BraA03.GH3-8.c  | F...LHG | SSDDK..EL  | FKKNVPVGYTEDF  | KPYIERVVNGEFS | SEIISGKPIITGFILTSG |                   |
| BraA03.GH3-8.d  | F...LHG | SSDDK..DL  | FKKNVPIGYTEDF  | KPYIERVANGESS | SEIISGRPITGFALTSG  |                   |
| BraA06.GH3-8.e  | F...LQG | SSDK..EL   | FKKNVPVVSIEDV  | KHYIYRVNGEFS  | SDVISGEPITAFLLSSG  |                   |
| BraA06.GH3-8.f  | F...LQG | SSDK..EL   | FKKNVPVVSIEDV  | KPYIDRVANGEP  | SDVISGEPITAFLLSSG  |                   |
| BraA09.GH3-8.g  | Y...LHG | SSDDK..EL  | FKKNVPVVSIEDV  | KPYIQRVTSGEFS | SNVISGKPIITRFLSSG  |                   |
| BraA09.GH3-8.h  | F...LEG | SSSEK..EL  | FKKNVPVVSIEDV  | KPYIDRVANGEP  | SDILSGKPIITAFFRSTG |                   |
| BraA10.GH3-8.i  | Y...LHG | SCDDK..EL  | FKKNVPVVSIEDV  | KPYIERVVNGEFS | SNVISGKPIITRFLSSG  |                   |
| BraA09.GH3-10.a | WLG     | DVDVEEMDD  | D.TLETITSLVP   | IVSHADLD      | PYIQRIADGETS       | SPLLTQEPITVLSLSSG |
| BraA03.GH3-11.a | F...GIN | G.NTTDPEA  | FKALVPLVTDLDL  | EPYIKRMVDGDT  | SPILTALPVP         | PAISLSSG          |
| BraA04.GH3-11.b | F...GIN | G.TTTDPEA  | FKALVPLVTDLE   | EPYIKRMVDGDT  | SPILTALPVP         | PAISLSSG          |
| BraA05.GH3-11.c | F...GIN | G.DTTDPEA  | FKALVPLVTDSE   | EPYIKRMVDGDT  | SPILTALPVP         | PAISLSSG          |
| BraA02.GH3-12.a | F...HVE | REFDK..EL  | FKKNVPVVSIEDI  | KPYIDRVVNGESS | SDVLSARPITGFLSSG   |                   |
| BraA03.GH3-12.b | F...HMD | REFDK..QL  | FKKNVPVITYEDI  | KPYIDRVVNGESS | SAVISARLITGFLSSG   |                   |
| BraA06.GH3-12.c | F...LHG | SSSK..EL   | FKKNLPVITYKDV  | KPYIDRVANGESS | SDVISALPITNVFVSSG  |                   |
| BraA10.GH3-12.d | F...NMD | REFDK..KL  | FKKNVPVVSIEDI  | KPDIDRVVNGESS | SDVISARPIITGFLSSG  |                   |
| BraA10.GH3-14.a | F...LKG | KFDK..QS   | FKKNLPVITYEDY  | RSYIDRIANGESS | FDIICDRPITVLLVSSG  |                   |
| BraA03.GH3-15.a | F...LNG | QLDDK..QS  | FKNNLPVITYEDY  | RPYIDRIANGESS | SDLICDQPIIVLLVSSG  |                   |
| BraA07.GH3-15.b | F...LNG | QVDDK..QS  | FKNNLPVITYEDY  | HSYIDRIANGEP  | FDLICDRPITVLLVSSG  |                   |
| BraA02.GH3-16.a | F...LNG | QLDDK..QS  | FKNNLPVITYEDY  | RPYIDRIADGES  | SNLICDRPISLLFLATG  |                   |
| BraA07.GH3-17.a | F...GES | SKNQQS     | FKKNVPVNYDDI   | KPFIQRIADGES  | SDIVSQPIITELLTSSG  |                   |
| BraA09.GH3-17.b | F...LDG | ESDKNQQS   | FKKNVPVNYDDI   | KPFIQRIADGES  | SDIVSQPIITELLTSSG  |                   |
| BraAX.GH3-17.c  | F...LDG | ESCNIQEN   | FKKNAPVNYEDI   | KPFIQRISDGDSS | SDILSAQPIITELLTSSG |                   |
| BraA04.GH3-19.a | F...LHG | SSDDK..EL  | FKKNVPVITYEDV  | KPYMERVANGEP  | SNVISGEPITQFFISSG  |                   |
| BraA06.GH3-19.b | F...LQG | SSDK..EL   | FKKNVPVVSIEDV  | KPYIDRVANGEP  | SDIISGEPITAFFRSTG  |                   |
| BraA09.GH3-19.c | F...LEG | SSDK..EL   | FKKNVPVVSIEDV  | KPYIDRVANGEP  | SDIISGEPITTFNRSSG  |                   |
| BraA09.GH3-19.d | F...LEG | SSDK..EL   | FKKNVPVVSIEDV  | KPYIDRVANGEP  | SDIISGEPITTFNRSSG  |                   |
| BraAX.GH3-19.e  | F...LHG | SNDK..EL   | FKKNVPLANYEDV  | KPYIERVANGEP  | SDLISGGPVTFRFRSSG  |                   |
| BolC09.GH3-1.a  | F...NLG | GATDR..DT  | FKSKLPITITYEDL | QPEIQRIADGDRS | SPILSAHPITSEFLTSSG |                   |
| BolC01.GH3-2.a  | F...GLN | GSTDR..KT  | FKTKVPVVITYEDL | KPEIQRISNGDRS | SPILSSHPIITEFLTSSG |                   |
| BolC08.GH3-3.a  | F...GLK | GFTDR..KT  | FKKNVPVITYDDI  | KPEIQRIANGDRS | SMILSSHPITD...SG   |                   |
| BolC01.GH3-5.a  | H...DLN | GRTDR..DT  | FKNIMPVITYEDI  | QPEINRIANGDKS | SPILSSKPISEFLTSSG  |                   |
| BolC07.GH3-5.b  | H...DLN | GRTDR..ET  | FKNIMPVITYEDI  | QPEINRIANGDKS | SPILSSKPISEFLTSSG  |                   |
| BolC02.GH3-6.a  | H...GLQ | GRTDR..ET  | FKHVPVVITYEDI  | QPEINRIANGDKS | QILCSTPISEFLTSSG   |                   |
| BolC03.GH3-6.b  | H...GLQ | GRTDR..ES  | FKHVPVVITYEDI  | QPEINRIANGDKS | QILCSTPISEFLTSSG   |                   |
| BolC06.GH3-7.a  | F...LHG | SSAK..EI   | FKKKLPVITYKDV  | KPFIDRVANGESS | SDIISALPITNFFVSSG  |                   |
| BolC01.GH3-8.a  | F...LHG | SADK..EL   | FKKNVPVGYTEDF  | KPYIERVVNGEFS | SGLVGRPLTFVFLSSG   |                   |
| BolC03.GH3-8.b  | F...LHG | SSDK..EL   | FKKNVPVITYDDV  | KLFIDLVANGEP  | FDVISGKPIITGFLSSG  |                   |
| BolC07.GH3-8.c  | F...LHG | SSDK..EL   | FKKNVPVGYTEDF  | KPYIERVVNGEFS | SEIISGKPIITGFILTSG |                   |
| BolC08.GH3-8.d  | F...LEG | SSDK..EL   | FKKNVPVVSIEDV  | KPYIDRVANGEP  | SDILSGEPITAFLLSSG  |                   |
| BolC09.GH3-8.e  | F...YT  | GAN..I     | .....          | .....         | .....SG            |                   |
| BolC09.GH3-10.a | WLG     | AVDVEEMDD  | D.TLETITSLVP   | IVSHADLD      | PYIQRIADGETS       | SPLLTQEPITVLSLSSG |
| BolC03.GH3-11.a | F...GIN | G.NTTDPEA  | FKALVPLVTDLDL  | EPYIKRMVDGDT  | SPILTALPVP         | PAISLSSG          |
| BolC04.GH3-11.b | F...GIN | K.NTTDPEA  | FKALVPLVTDLE   | EPYIKRMVDGDT  | SPILTALPVP         | PAISLSSG          |
| BolCX.GH3-11.c  | F...GIN | G.DNTDPEA  | FKALVPLVTDSE   | EPYIKRMVDGDT  | SPILTALPVP         | PAISLSSG          |
| BolC03.GH3-12.a | F...HMD | REFDK..EL  | FKKNVPVITYEDI  | KPYIDRVVNGESS | SDVISNRPIITGFLSSG  |                   |
| BolC09.GH3-12.b | F...RVE | REFDK..EL  | FKKNVPVVSIEDI  | KPYIDRVVNGESS | SDVISTRPIITGFLSSG  |                   |
| BolC09.GH3-14.a | F...LKG | KFDK..QS   | FKKNLPVITYEDY  | RSYIDRIANGESS | FDIICDRPITVLLVSSG  |                   |
| BolC03.GH3-15.a | F...LNG | QLDDK..QS  | FKNNLPVITYEDY  | RPYIDRIANGESS | SDLICDQPIIVLLVSSG  |                   |
| BolCX.GH3-16.a  | F...LSG | QIDDK..QS  | FKKNLPVITYEDY  | RSYIDRIADGES  | SNLICDRPISLLFLATG  |                   |
| BolC07.GH3-17.a | F...LDG | ESDKNQQS   | FKKNVPVNYDDI   | KPFIQRIADGES  | SDIVSQPIITELLTSSG  |                   |
| BolC08.GH3-17.b | F...IDG | ESCSIQEI   | FKKNAPVNYEDI   | KPFIQRICDGDSS | SDILSAQPIITELLTSSG |                   |
| BolC08.GH3-19.a | F...LEG | SSDK..EL   | FKKNVPVVSIEDV  | KPYIDRVANGEP  | SDIISGEPITTFNRSSG  |                   |
| BnaA09R.GH3-1.a | F...NLG | GATDR..DT  | FKSKLPITITYEDL | QPEIQRIADGDRS | SPILSAHPITSEFLTSSG |                   |
| BnaCX.GH3-1.a   | F...NLG | GATDR..DT  | FKSKLPITITYEDL | QPEIQRIADGDRS | SPILSAHPITSEFLTSSG |                   |
| BnaA01.GH3-2.a  | F...GLN | GSTDR..KT  | FKTKVPVVITYEDL | KPEIQRISNGDRS | SPILSSHPIITEFLTSSG |                   |
| BnaA09.GH3-3.a  | F...GLK | GSTDR..KT  | FKKNVPVITYDDI  | KPEIQRIANGDRS | SMILSSHPITEFLTSSG  |                   |
| BnaC08.GH3-3.a  | F...GLK | GFTDR..KT  | FKKNVPVITYDDI  | KPEIQRIANGDRS | SMILSSHPITD...SG   |                   |
| BnaA01.GH3-5.a  | H...DLN | GRTDR..ET  | FKNIMPVITYEDI  | QPEINRIANGDKS | SPILSSKPISEFLTSSG  |                   |
| BnaA03.GH3-5.b  | H...DLN | GRTDR..ET  | FKNIMPVITYEDI  | QPEINRIANGDKS | SPILSSKPISEFLTSSG  |                   |
| BnaC01.GH3-5.a  | H...DLN | GRTDR..DT  | FKNIMPVITYEDI  | QPEINRIANGDKS | SPILSSKPISEFLTSSG  |                   |
| BnaC07.GH3-5.b  | H...DLN | GRTDR..ET  | FKNIMPVITYEDI  | QPEINRIANGDKS | SPILSSKPISEFLTSSG  |                   |
| BnaA03.GH3-6.a  | H...GLQ | GRTDR..ET  | FKHVPVVITYEDI  | QPEINRIANGDKS | QILCSTPISEFLTSSG   |                   |
| BnaAX.GH3-6.b   | H...GLQ | GRTDR..ET  | FKHVPVVITYEDI  | QPEINRIANGDKS | QILCSTPISEFLTSSG   |                   |
| BnaC03.GH3-6.a  | H...GLQ | GRTDR..ES  | FKHVPVVITYEDI  | QPEINRIANGDKS | QILCSTPISEFLTSSG   |                   |
| BnaCX.GH3-6.b   | H...GLQ | GRTDR..ET  | FKHVPVVITYEDI  | QPEINRIANGDKS | QILCSTPISEFLTSSG   |                   |
| BnaA06.GH3-7.a  | F...LHG | SSAK..EI   | FKKNLPVITYKDV  | KPYIDRVANGESS | SDIISALPITNFFNSSG  |                   |
| BnaA08.GH3-7.b  | F...FHG | KFDK..EI   | FKKNVPVGYTEDV  | KPYIQRVANGEP  | SNVISTRPIITGFLSSG  |                   |
| BnaC06.GH3-7.a  | F...LHG | SSA...I    | FKKKLPVITYKDV  | KPFIDRVANGESS | SDIISALPITNFFNSSG  |                   |
| BnaA03.GH3-8.a  | F...LHG | SSDK..EL   | FKKNVPVITYDDV  | KLFIDLVANGEP  | FDVISGKPIITGFLSSG  |                   |
| BnaA03.GH3-8.b  | F...LHG | SSDK..EV   | FKKNVPVITYEDF  | KPYIERVVNGEFS | SEIISGKPIITGFILTSG |                   |
| BnaA03.GH3-8.c  | F...LHG | SSDK..DL   | FKKNVPIGYTEDF  | KPYIERVANGESS | SEIISGRPITGFALTSG  |                   |
| BnaA06.GH3-8.d  | F...LQG | SSDK..DL   | FKKNVPVVSIEDV  | KPYIDRVNGEFS  | SDVISGEPITAFLLSSG  |                   |

|                  |   |     |           |        |                 |                  |            |       |       |      |
|------------------|---|-----|-----------|--------|-----------------|------------------|------------|-------|-------|------|
| BnaA06.GH3-8.e   | F | ... | LQGSADK   | .EL    | FKKNVPVVSIEDVK  | PYIDRVANGEP      | SDVIS      | GEPIT | AFVLV | SSG  |
| BnaA09.GH3-8.f   | F | ... | LEGSSSEK  | .EL    | FKKNVPVVSIEDVK  | PYIDRVANGEP      | SDILS      | GKPIT | AFFR  | SSG  |
| BnaA09.GH3-8.g   | F | ... | LEGSSSEK  | .EL    | FKKNVPVVSIEDVK  | PYIDRIANGEP      | SDILS      | GKPIT | AFIL  | SSG  |
| BnaAX.GH3-8.h    | F | ... | ...       | ...    | ...             | ...              | ...        | ...   | ...   | ...  |
| BnaAX.GH3-8.i    | F | ... | LEGSSDK   | .EL    | FKKNVPVVSIEDVK  | PYIDRVANGEP      | SDILS      | GEPIT | AFTL  | SSG  |
| BnaC01.GH3-8.a   | F | ... | LHGSSADK  | .EL    | FKKNVPVGTIYEDFK | PYIERVUNGEP      | SGLVS      | GRPLT | GFLV  | SSG  |
| BnaC02.GH3-8.b   | F | ... | LHGSSDK   | .EL    | FKKNVPVTIYEDVK  | LYIGRVANGEP      | FDVIS      | GKPI  | GFL   | SSG  |
| BnaC02.GH3-8.c   | F | ... | LHGSSDK   | .EL    | FKKNVPVTIYEDVK  | LYIGRVANGEP      | FDVIS      | GKPI  | GFL   | SSG  |
| BnaC02.GH3-8.d   | F | ... | LHGSSDK   | .EL    | FKKNVPVTIYEDVK  | LYIGRVANGEP      | FDVIS      | GKPI  | GFL   | SSG  |
| BnaC07.GH3-8.e   | F | ... | LHGSSDK   | .EL    | FKKNVPVGTIYEDFK | PYIERVUNGEP      | SEIIS      | GKPI  | GFL   | SSG  |
| BnaC09.GH3-8.f   | Y | ... | LHGAYDK   | .EL    | FKKNVPVVSIDYDK  | PYIERVANGEP      | SNVIS      | GKPI  | REFL  | SSG  |
| BnaCX.GH3-8.g    | F | ... | LQGSADK   | .EL    | FKKNVPVVSIEDVK  | PYIDRVANGEP      | SDVIS      | GEPIT | AFVLV | SSG  |
| BnaA05.GH3-9.a   | Y | ... | MKGSKDV   | .LE    | FKRSVPITTYKDV   | PYIQRANGED       | SSLIT      | GH    | LIT   | SSG  |
| BnaC04.GH3-9.a   | Y | ... | MKGSKDV   | .ME    | FKRSVPVITYKDV   | PYIQRANGED       | SSLIT      | GH    | PIT   | SSG  |
| BnaA03.GH3-10.a  | F | ... | WLGSVDV   | KEIDD  | LSLETLT         | FTSLVPIVSHADLD   | PYIQRANGET | SPILT | QEPIT | VLSL |
| BnaA09.GH3-10.b  | F | ... | WLGDVVD   | VEEMDD | TLETLT          | FTSLVPIVSHADLD   | PYIQRADGET | SPILT | QEPIT | VLSL |
| BnaC09.GH3-10.a  | F | ... | WLGAVDV   | VEEMDD | TLETLT          | FTSLVPIVSHADLD   | PYIQRADGET | SPILT | QEPIT | VLSL |
| BnaA03.GH3-11.a  | F | ... | GING.NTTD | PEA    | FKALVPLVTD      | LEFPYIKRMVDGDT   | SPILTAL    | PVP   | ATSL  | SSG  |
| BnaA04R.GH3-11.b | F | ... | GING.TTTD | PEA    | FKALVPLVTD      | LEFPYIKRMVDGDT   | SPILT      | GRPVP | ATSL  | SSG  |
| BnaA05.GH3-11.c  | F | ... | GINGDIT   | TTDEGD | FKALVPLVTD      | SELEFPYIKRMVDGDT | SPILT      | GH    | PVP   | ATSL |
| BnaC04.GH3-11.a  | F | ... | GING.NTTD | PEA    | FKALVPLVTD      | LEFPYIKRMVDGDT   | SPILT      | GRPVP | ATSL  | SSG  |
| BnaCX.GH3-11.b   | F | ... | GING.NTTD | PEA    | FKALVPLVTD      | LEFPYIKRMVDGDT   | SPILTAL    | PVP   | ATSL  | SSG  |
| BnaA02.GH3-12.a  | F | ... | HVERFDK   | .EL    | FKKNVPVVSIEIK   | PYIDRVNGES       | SDVIS      | ARPIT | GFL   | SSG  |
| BnaA03.GH3-12.b  | F | ... | HMDRFDK   | .QL    | FKKNVPVVTYEDIK  | PYIDRVNGES       | SDVIS      | ARPIT | GFL   | SSG  |
| BnaA06.GH3-12.c  | F | ... | LHGSSSK   | .EL    | FKKNLPVITYKDV   | KPYIDRVANGES     | SDVIS      | ALPIT | NV    | SSG  |
| BnaA10.GH3-12.d  | F | ... | HMDRFDK   | .KL    | FKKNVPVVSIEDIK  | PYIDRVNGES       | SDVIS      | ARPIT | GFL   | SSG  |
| BnaC02.GH3-12.a  | F | ... | HVERFDK   | .EL    | FKKNVPVVSIEDIK  | PYIDRVNGET       | SEVIS      | ARPIT | GFL   | SSG  |
| BnaC03.GH3-12.b  | F | ... | HMDRFDK   | .EL    | FKKNVPVVTYEDIK  | PYIDRVNGES       | SDVIS      | NR    | PIT   | SSG  |
| BnaC09.GH3-12.c  | F | ... | HVERFDK   | .EL    | FKKNVPVVSIEDIK  | PYIDRVNGES       | SDVIS      | TR    | PIT   | SSG  |
| BnaA10.GH3-14.a  | F | ... | LKGKFDK   | .QS    | FKKNLPVITYEDY   | RSYIDRIANGES     | SDIIC      | DR    | PIT   | SSG  |
| BnaC09.GH3-14.a  | F | ... | LKGKFDK   | .QT    | FKKNLPVITYEDY   | RSYIDRIANGEP     | SDIIC      | DR    | PVT   | SSG  |
| BnaA03.GH3-15.a  | F | ... | LNGQLDK   | .QS    | FKKNLPVVTYEDY   | RSYIDRIANGES     | SDIIC      | DQ    | PIT   | SSG  |
| BnaC03.GH3-15.a  | F | ... | LNGQLDK   | .QS    | FKKNLPVVTYEDY   | RSYIDRIANGES     | SDIIC      | DQ    | PIT   | SSG  |
| BnaAX.GH3-16.a   | F | ... | LNGQLDK   | .QS    | FKKNLPVVTYEDY   | RSYIDRIADGES     | SNLIC      | DR    | PIS   | SSG  |
| BnaC02.GH3-16.a  | F | ... | LSGHIDK   | .QS    | FKKNLPVVTYEDY   | RSYINRIADGES     | SNLIC      | DR    | PIS   | SSG  |
| BnaA07.GH3-17.a  | F | ... | LDGESDK   | NQQS   | FKKNVPVVNYDDIK  | PFIQRIADGES      | SDIVS      | VP    | PIT   | SSG  |
| BnaA08.GH3-17.b  | F | ... | LDGESCN   | IQEN   | FKNKAPVVNYEDIK  | PFIQRIADGES      | SDIVS      | VP    | PIT   | SSG  |
| BnaA09.GH3-17.c  | F | ... | LDGESDK   | NQQS   | FKKNVPVVNYDDIK  | PFIQRIADGES      | SDIVS      | VP    | PIT   | SSG  |
| BnaC08.GH3-17.a  | F | ... | LDGESDK   | NQQS   | FKKNVPVVNYDDIK  | PFIQRIADGES      | SDIVS      | VP    | PIT   | SSG  |
| BnaCX.GH3-17.b   | F | ... | LDGESDK   | NQQS   | FKKNVPVVNYDDIK  | PFIQRIADGES      | SDIVS      | VP    | PIT   | SSG  |
| BnaCX.GH3-17.c   | F | ... | LDGESDK   | NQQS   | FKKNVPVVNYDDIK  | PFIQRIADGES      | SDIVS      | VP    | PIT   | SSG  |
| BnaA05GH3-18.a   | F | ... | LHGSSDK   | .EL    | FKKNVPLANYIEDVK | PYIERVANGEP      | SDILS      | GGPVT | RFR   | SSG  |
| BnaCX.GH3-18.a   | F | ... | LEGSSDK   | .EL    | FKKNVPVVSIEDVK  | PYIDRVANGEP      | SDIIS      | GEPIT | TFNR  | SSG  |
|                  |   |     |           |        |                 |                  |            |       |       |      |



|                 | 110  | 120     | 130  | 140   | 150   |       |       |       |       |       |       |       |       |       |     |     |     |         |        |      |
|-----------------|------|---------|------|-------|-------|-------|-------|-------|-------|-------|-------|-------|-------|-------|-----|-----|-----|---------|--------|------|
| AtGH3-1         | TSAG | ERKLMP  | TI   | KEE   | LD    | RRQL  | LYS   | L     | LMP   | VMNL  | ..... | YV    | ..    | PGLDK | GK  | GLY | FL  | FLVK    |        |      |
| AtGH3-2         | TSAG | ERKLMP  | TI   | EED   | LD    | RRQL  | LYS   | L     | LMP   | VMNL  | ..... | YV    | ..    | PGLDK | GK  | GLY | FL  | FLVK    |        |      |
| AtGH3-3         | TSAG | ERKLMP  | TI   | EED   | MD    | RRQL  | LYS   | L     | LMP   | VMNL  | ..... | YV    | ..    | PGLDK | GK  | GLY | FL  | FLVK    |        |      |
| AtGH3-4         | TSAG | ERKLMP  | TI   | EED   | IN    | RRQL  | LYS   | L     | LMP   | VMNL  | ..... | YV    | ..    | PGLDK | GK  | GLY | FL  | FLVK    |        |      |
| AtGH3-5         | TSAG | ERKLMP  | TI   | EEE   | LD    | RRSL  | LYS   | L     | LMP   | VMSQ  | ..... | FV    | ..    | PGLDK | GK  | GLY | FL  | FLVK    |        |      |
| AtGH3-6         | TSAG | ERKLMP  | TI   | EEE   | LD    | RRSL  | LYS   | L     | LMP   | VMSQ  | ..... | FV    | ..    | PGLDK | GK  | GLY | FL  | FLVK    |        |      |
| AtGH3-7         | TSAG | QAQKMP  | WN   | EKY   | LD    | NLTF  | MYD   | LR    | MRH   | IISN  | ..... | NV    | ..    | KD    | VEK | GK  | AM  | MYFTK   |        |      |
| AtGH3-8         | TSAG | GKQKMP  | PR   | NKY   | LE    | NIKF  | IFY   | Y     | RS    | VISK  | ..... | HI    | ..    | DG    | LEH | GK  | GM  | VFNCT   |        |      |
| AtGH3-9         | TSAG | EPKLMP  | TI   | ED    | LD    | RRTF  | LYN   | L     | IIP   | IVNK  | ..... | YI    | ..    | TG    | LDK | GK  | AM  | LYNFVK  |        |      |
| AtGH3-10        | TT   | GRQKYVP | TR   | HS    | AQ    | TTLQ  | IFR   | L     | SAA   | YRSR  | ..... | FY    | ..    | PI    | REG | GR  | ILE | FIYAG   |        |      |
| AtGH3-11        | TSAG | GRPKFIP | TD   | EL    | MENT  | LQ    | LF    | R     | TAF   | FRNR  | ..... | DE    | ..    | PI    | DDN | GR  | ALQ | FI      | FSS    |      |
| AtGH3-12        | TSAG | QAQKMP  | WN   | KY    | LD    | NLTF  | IYD   | LR    | MQ    | VITK  | ..... | HV    | ..    | KG    | VEE | GK  | GM  | FLFTK   |        |      |
| AtGH3-13        | TTAG | IONLIPI | LT   | ED    | GE    | QIM   | FGS   | LY    | RS    | LLYK  | ..... | YV    | ..    | EG    | IRE | GK  | SL  | TFYFN   |        |      |
| AtGH3-14        | TSAG | VPKLIP  | LT   | EE    | LE    | QRIS  | FAS   | LY    | RP    | LLYK  | ..... | YI    | ..    | EG    | IRE | RK  | S   | FMLYFVT |        |      |
| AtGH3-15        | TSAG | VPKLIP  | LT   | ED    | LE    | QRIS  | FSS   | LY    | AP    | LLYK  | ..... | HI    | ..    | DG    | LSE | GK  | SL  | TFYFVT  |        |      |
| AtGH3-16        | TSAG | IPKLIP  | LT   | EE    | LE    | QRIL  | FGF   | LY    | VP    | LVFK  | ..... | HI    | ..    | EG    | LTQ | GK  | SL  | TFYFVT  |        |      |
| AtGH3-17        | TSAG | KPKLMP  | ST   | AE    | LE    | RKTF  | FYS   | M     | LVP   | IMNK  | ..... | YV    | ..    | DG    | LDE | GK  | GM  | LYLFLIK |        |      |
| AtGH3-18        | TSAG | GKQKVP  | VN   | DY    | IE    | KGY   | VIA   | L     | RS    | LMSK  | ..... | HE    | ..    | DS    | GGE | QK  | AME | FHCTK   |        |      |
| AtGH3-19        | TSAG | IHKIFV  | VN   | DY    | IE    | NLGY  | LLA   | V     | SSL   | ITSN  | ..... | ..    | ..    | DK    | VDE | K   | GK  | MAFLYNR |        |      |
| BraX.GH3-1.a    | TSAG | ERKLMP  | TI   | EE    | LD    | RRQL  | LYS   | L     | LMP   | VMNL  | ..... | YV    | ..    | PGLDK | GK  | GLY | FL  | FLVK    |        |      |
| BraX.GH3-2.a    | TSAG | ERKLMP  | TI   | EE    | LD    | RRQL  | LYS   | L     | LMP   | VMNL  | ..... | YV    | ..    | PGLDK | GK  | GLY | FL  | FLVK    |        |      |
| BraA09.GH3-3.a  | TSAG | ERKLMP  | TI   | EE    | MD    | RRQL  | LYS   | L     | LMP   | VMNL  | ..... | YV    | ..    | PGLDK | GK  | GLY | FL  | FLVK    |        |      |
| BraA01.GH3-5.a  | TSAG | ERKLMP  | TI   | EE    | LD    | RRSL  | LYS   | L     | LMP   | VMSQ  | ..... | FV    | ..    | PGLDK | GK  | GLY | FL  | FLVK    |        |      |
| BraA03.GH3-5.b  | TSAG | ERKLMP  | TI   | EE    | LD    | RRSL  | LYS   | L     | LMP   | VMSQ  | ..... | FV    | ..    | PGLDK | GK  | GLY | FL  | FLVK    |        |      |
| BraA02.GH3-6.a  | TSAG | ERKLMP  | TI   | EE    | LD    | RRSL  | LYS   | L     | LMP   | VMSQ  | ..... | FV    | ..    | PGLDK | GK  | GLY | FL  | FLVK    |        |      |
| BraA03.GH3-6.b  | TSAG | ERKLMP  | TI   | EE    | LD    | RRSL  | LYS   | L     | LMP   | VMSQ  | ..... | FV    | ..    | PGLDK | GK  | GLY | FL  | FLVK    |        |      |
| BraA06.GH3-7.a  | TSAG | ANKILP  | SN   | SKY   | LD    | GS    | AF    | STD   | L     | IAH   | VIRK  | ..... | HV    | ..    | KG  | VER | GK  | GM      | FLFTG  |      |
| BraA08.GH3-7.b  | TSAG | QAQKIMP | WN   | EKF   | LD    | YLT   | F     | MYD   | LR    | MRH   | VITN  | ..... | YV    | ..    | KG  | LEK | GK  | AM      | MYFTK  |      |
| BraA02.GH3-8.a  | TSAG | KRKMP   | PR   | NKY   | LE    | NLKF  | IYF   | Y     | RS    | VITK  | ..... | HI    | ..    | DG    | LEH | GK  | GM  | VFNCT   |        |      |
| BraA03.GH3-8.b  | TSAG | KRKMP   | PR   | NKY   | LE    | NLKF  | IYF   | Y     | RS    | VITK  | ..... | HI    | ..    | DG    | LEH | GK  | GM  | VFNCT   |        |      |
| BraA03.GH3-8.c  | TSAG | KRKMP   | PR   | NKY   | LE    | NLKF  | IYF   | Y     | RS    | VITK  | ..... | HI    | ..    | DG    | LEH | GK  | GM  | VFNCT   |        |      |
| BraA03.GH3-8.d  | TSAG | KRKMP   | PR   | NKY   | LE    | NLKF  | IYF   | Y     | RS    | VITK  | ..... | HI    | ..    | DG    | LEH | GK  | GM  | VFNCT   |        |      |
| BraA03.GH3-8.e  | TSAG | KRKMP   | PR   | NKY   | LE    | NLKF  | IYF   | Y     | RS    | VITK  | ..... | HI    | ..    | DG    | LEH | GK  | GM  | VFNCT   |        |      |
| BraA06.GH3-8.f  | TSAG | GNQKIF  | PANN | IF    | F     | KNI   | QI    | FYT   | L     | GS    | VMSK  | ..... | CH    | ..    | DG  | YKQ | GK  | VI      | FRFTTH |      |
| BraA09.GH3-8.g  | TSAG | GNQKIF  | PANN | IF    | F     | KNI   | QI    | FYT   | L     | GS    | VMSK  | ..... | CH    | ..    | DG  | YKQ | GK  | VI      | FRFTTH |      |
| BraA09.GH3-8.h  | TSAG | GNQKIF  | PANN | IF    | F     | KNI   | QI    | FYT   | L     | GS    | VMSK  | ..... | CH    | ..    | DG  | YKQ | GK  | VI      | FRFTTH |      |
| BraA10.GH3-8.i  | TTAG | KQKIF   | VN   | NKF   | FED   | MSF   | II    | A     | L     | R     | L     | F     | ..... | HE    | ..  | EG  | GQK | GK      | AL     | TFTR |
| BraA09.GH3-10.a | TT   | GRQKYVP | TR   | HS    | AQ    | TTLQ  | IFR   | L     | SAA   | YRSR  | ..... | FY    | ..    | PI    | KEG | GR  | ILE | FIYAG   |        |      |
| BraA03.GH3-11.a | TSAG | GRPKFIP | TD   | EL    | MENT  | LQ    | LF    | R     | TAF   | FRNR  | ..... | DE    | ..    | PI    | DDN | GR  | ALQ | FI      | FSS    |      |
| BraA04.GH3-11.b | TSAG | GRPKFIP | TD   | EL    | MENT  | LQ    | LF    | R     | TAF   | FRNR  | ..... | DE    | ..    | PI    | DDN | GR  | ALQ | FI      | FSS    |      |
| BraA05.GH3-11.c | TSAG | GRPKFIP | TD   | EL    | MENT  | LQ    | LF    | R     | TAF   | FRNR  | ..... | DE    | ..    | PI    | DDN | GR  | ALQ | FI      | FSS    |      |
| BraA02.GH3-12.a | TSAG | QAQKMP  | WN   | KY    | LD    | NLTF  | AYD   | LR    | MRH   | VITK  | ..... | HV    | ..    | KG    | LEE | GK  | GM  | FLFTK   |        |      |
| BraA03.GH3-12.b | TSAG | QAQKMP  | WN   | KY    | LD    | NLTF  | AYD   | LR    | MRH   | VITK  | ..... | HV    | ..    | KG    | LEE | GK  | GM  | FLFTK   |        |      |
| BraA06.GH3-12.c | TSAG | QAQKMP  | WN   | KY    | LD    | NLTF  | AYD   | LR    | MRH   | VITK  | ..... | HV    | ..    | KG    | LEE | GK  | GM  | FLFTK   |        |      |
| BraA10.GH3-12.d | TSAG | QAQKMP  | WN   | KY    | LD    | NLTF  | AYD   | LR    | MRH   | VITK  | ..... | HV    | ..    | KG    | LEE | GK  | GM  | FLFTK   |        |      |
| BraA10.GH3-14.a | TSAG | VPKLIP  | LT   | EE    | LE    | QRNL  | FVS   | LY    | RP    | LPFK  | ..... | HI    | ..    | KG    | LSE | GK  | SL  | TFYFLT  |        |      |
| BraA03.GH3-15.a | TSAG | VPKLIP  | LT   | EE    | LE    | QRNL  | FVS   | LY    | RP    | LPFK  | ..... | HI    | ..    | KG    | LSE | GK  | SL  | TFYFLT  |        |      |
| BraA07.GH3-15.b | TSAG | VPKLIP  | LT   | EE    | LE    | QRNL  | FVS   | LY    | RP    | LPFK  | ..... | HI    | ..    | KG    | LSE | GK  | SL  | TFYFLT  |        |      |
| BraA02.GH3-16.a | TSAG | VPKLIP  | LT   | EE    | LE    | QRNL  | FVS   | LY    | RP    | LPFK  | ..... | HI    | ..    | KG    | LSE | GK  | SL  | TFYFLT  |        |      |
| BraA07.GH3-17.a | TSAG | KPKLMP  | ST   | AE    | LE    | RKTF  | FYS   | M     | LVP   | VMNK  | ..... | YV    | ..    | NG    | LDE | GK  | GM  | LYLFLIK |        |      |
| BraA09.GH3-17.b | TSAG | KPKLMP  | ST   | AE    | LE    | RKTF  | FYS   | M     | LVP   | VMNK  | ..... | YV    | ..    | NG    | LDE | GK  | GM  | LYLFLIK |        |      |
| BraAX.GH3-17.c  | TSAG | KPKLMP  | ST   | AE    | LE    | RKTF  | FYS   | M     | LVP   | VMNK  | ..... | YV    | ..    | NG    | LDE | GK  | GM  | LYLFLIK |        |      |
| BraA04.GH3-19.a | TSAG | GKQKIY  | ANN  | ..... | ..... | ..... | ..... | ..... | ..... | ..... | ..... | HI    | ..    | KG    | VED | GK  | VM  | FLNTR   |        |      |
| BraA09.GH3-19.b | TSAG | GNQKIF  | PANN | IF    | F     | KNI   | QI    | FYT   | L     | GS    | VMSK  | ..... | CH    | ..    | DG  | YKQ | GK  | VI      | FRFTTH |      |
| BraA09.GH3-19.c | TSAG | GNQKIF  | PANN | IF    | F     | KNI   | QI    | FYT   | L     | GS    | VMSK  | ..... | CH    | ..    | DG  | YKQ | GK  | VI      | FRFTTH |      |
| BraA09.GH3-19.d | TSAG | GNQKIF  | PANN | IF    | F     | KNI   | QI    | FYT   | L     | GS    | VMSK  | ..... | CH    | ..    | DG  | YKQ | GK  | VI      | FRFTTH |      |
| BraAX.GH3-19.e  | TSAG | GNQKIF  | PANN | IF    | F     | KNI   | QI    | FYT   | L     | GS    | VMSK  | ..... | CH    | ..    | DG  | YKQ | GK  | VI      | FRFTTH |      |
| BolC09.GH3-1.a  | TSAG | ERKLMP  | TI   | EE    | LD    | RRQL  | LYS   | L     | LMP   | VMNL  | ..... | YV    | ..    | PGLDK | GK  | GLY | FL  | FLVK    |        |      |
| BolC01.GH3-2.a  | TSAG | ERKLMP  | TI   | EE    | LD    | RRQL  | LYS   | L     | LMP   | VMNL  | ..... | YV    | ..    | PGLDK | GK  | GLY | FL  | FLVK    |        |      |
| BolC08.GH3-3.a  | TSAG | ERKLMP  | TI   | EE    | MD    | RRQL  | LYS   | L     | LMP   | VMNL  | ..... | YV    | ..    | PGLDK | GK  | GLY | FL  | FLVK    |        |      |
| BolC01.GH3-5.a  | TSAG | ERKLMP  | TI   | EE    | LD    | RRSL  | LYS   | L     | LMP   | VMSQ  | ..... | FV    | ..    | PGLDK | GK  | GLY | FL  | FLVK    |        |      |
| BolC07.GH3-5.b  | TSAG | ERKLMP  | TI   | EE    | LD    | RRSL  | LYS   | L     | LMP   | VMSQ  | ..... | FV    | ..    | PGLDK | GK  | GLY | FL  | FLVK    |        |      |
| BolC02.GH3-6.a  | TSAG | ERKLMP  | TI   | EE    | LD    | RRSL  | LYS   | L     | LMP   | VMSQ  | ..... | FV    | ..    | PGLDK | GK  | GLY | FL  | FLVK    |        |      |
| BolC03.GH3-6.b  | TSAG | ERKLMP  | TI   | EE    | LD    | RRSL  | LYS   | L     | LMP   | VMSQ  | ..... | FV    | ..    | PGLDK | GK  | GLY | FL  | FLVK    |        |      |
| BolC06.GH3-7.a  | TSAG | ANKILP  | SN   | SKY   | LD    | GS    | AF    | VND   | L     | IAH   | VIRK  | ..... | HV    | ..    | KG  | VER | GK  | GM      | FLFTG  |      |
| BolC01.GH3-8.a  | TSAG | GKQKLIP | MND  | KY    | LE    | NLKF  | IYF   | Y     | RS    | VITK  | ..... | HI    | ..    | DG    | LEH | GK  | GM  | VFNCT   |        |      |
| BolC03.GH3-8.b  | TSAG | GKQKLIP | MND  | KY    | LE    | NLKF  | IYF   | Y     | RS    | VITK  | ..... | HI    | ..    | DG    | LEH | GK  | GM  | VFNCT   |        |      |
| BolC07.GH3-8.c  | TSAG | GKQKLIP | MND  | KY    | LE    | NLKF  | IYF   | Y     | RS    | VITK  | ..... | HI    | ..    | DG    | LEH | GK  | GM  | VFNCT   |        |      |
| BolC08.GH3-8.d  | TSAG | GKQKLIP | MND  | KY    | LE    | NLKF  | IYF   | Y     | RS    | VITK  | ..... | HI    | ..    | DG    | LEH | GK  | GM  | VFNCT   |        |      |
| BolC09.GH3-8.e  | TTAG | KQKIF   | VN   | NKF   | FED   | MSF   | II    | A     | L     | R     | L     | F     | ..... | HE    | ..  | EG  | GQK | GK      | AL     | TFTR |
| BolC09.GH3-10.a | TT   | GRQKYVP | TR   | HS    | AQ    | TTLQ  | IFR   | L     | SAA   | YRSR  | ..... | FY    | ..    | PI    | KEG | GR  | ILE | FIYAG   |        |      |
| BolC03.GH3-11.a | TSAG | GRPKFIP | TD   | EL    | MENT  | LQ    | LF    | R     | TAF   | FRNR  | ..... | DE    | ..    | PI    | DDN | GR  | ALQ | FI      | FSS    |      |
| BolC04.GH3-11.b | TSAG | GRPKFIP | TD   | EL    | MENT  | LQ    | LF    | R     | TAF   | FRNR  | ..... | DE    | ..    | PI    | DDN | GR  | ALQ | FI      | FSS    |      |
| BolCX.GH3-11.c  | TSAG | GRPKFIP | TD   | EL    | MENT  | LQ    | LF    | R     | TAF   | FRNR  | ..... | DE    | ..    | PI    | DDN | GR  | ALQ | FI      | FSS    |      |
| BolC03.GH3-12.a | TSAG | QAQKMP  | WN   | KY    | LD    | NLTF  | AYD   | LR    | MRH   | VITK  | ..... | HV    | ..    | KG    | LEE | GK  | GM  | FLFTK   |        |      |
| BolC09.GH3-12.b | TSAG | QAQKMP  | WN   | KY    | LD    | NLTF  | AYD   | LR    | MRH   | VITK  | ..... | HV    | ..    | KG    | LEE | GK  | GM  | FLFTK   |        |      |
| BolC09.GH3-14.a | TSAG | VPKLIP  | LT   | EE    | LE    | QRNL  | FVS   | LY    | RP    | LPFK  | ..... | HI    | ..    | KG    | LSE | GK  | SL  | TFYFLT  |        |      |
| BolC03.GH3-15.a | TSAG | VPKLIP  | LT   | EE    | LE    | QRNL  | FVS   | LY    | RP    | LPFK  | ..... | HI    | ..    | KG    | LSE | GK  | SL  | TFYFLT  |        |      |
| BolCX.GH3-16.a  | TSAG | VPKLIP  | LT   | EE    | LE    | QRNL  | FVS   | LY    | RP    | LPFK  | ..... | HI    | ..    | KG    | LSE | GK  | SL  | TFYFLT  |        |      |
| BolC07.GH3-17.a | TSAG | KPKLMP  | ST   | AE    | LE    | RKTF  | FYS   | M     | LVP   | VMNK  | ..... | YV    | ..    | NG    | LDE | GK  | GM  | LYLFLIK |        |      |
| BolC08.GH3-17.b | TSAG | KPKLMP  | ST   | AE    | LE    | RKTF  | FYS   | M     | LVP   | VMNK  | ..... | YV    | ..    | NG    | LDE | GK  | GM  | LYLFLIK |        |      |
| BolC08.GH3-19.a | TSAG | GNQKIF  | PANN | IF    | F     | KNI   | QI    | FYT   | L     | GS    | VMSK  | ..... | CH    | ..    | DG  | YKQ | GK  | VI      | FRFTTH |      |
| BnaA09R.GH3-1.a | TSAG | ERKLMP  | TI   | EE    | LD    | RRQL  | LYS   | L     | LMP   | VMNL  | ..... | YV    | ..    | PGLDK | GK  | GLY | FL  | FLVK    |        |      |
| BnaCX.GH3-1.a   | TSAG | ERKLMP  | TI   | EE    | LD    | RRQL  | LYS   | L     | LMP   | VMNL  | ..... | YV    | ..    | PGLDK | GK  | GLY | FL  | FLVK    |        |      |
| BnaA01.GH3-2.a  | TSAG | ERKLMP  | TI   | EE    | LD    | RRQL  | LYS   | L     | LMP   | VMNL  | ..... | YV    | ..    | PGLDK | GK  | GLY | FL  | FLVK    |        |      |
| BnaA01.GH3-3.a  | TSAG | ERKLMP  | TI   | EE    | MD    | RRQL  | LYS   | L     | LMP   | VMNL  | ..... | YV    | ..    | PGLDK | GK  | GLY | FL  | FLVK    |        |      |
| BnaA08.GH3-3.a  | TSAG | ERKLMP  | TI   | EE    | MD    | RRQL  | LYS   | L     | LMP   | VMNL  | ..... | YV    | ..    | PGLDK | GK  | GLY | FL  | FLVK    |        |      |
| BnaA01.GH3-5.a  | TSAG | ERKLMP  | TI   | EE    | LD    | RRSL  | LYS   | L     | LMP   | VMSQ  | ..... | FV    | ..    | PGLDK | GK  | GLY | FL  | FLVK    |        |      |
| BnaA03.GH3-5.b  | TSAG | ERKLMP  | TI   | EE    | LD    | RRSL  | LYS   | L     | LMP   | VMSQ  | ..... | FV    | ..    | PGLDK | GK  | GLY | FL  | FLVK    |        |      |
| BnaA01.GH3-5.a  | TSAG | ERKLMP  | TI   | EE    | LD    | RRSL  | LYS   | L     | LMP   | VMSQ  | ..... | FV    | ..    | PGLDK | GK  |     |     |         |        |      |

BnaA06.GH3-8.e TSSGNQKIFPANNIFFKNIQIFYTLGSLVMSK.....CF..DGYKQGVIRFTFTH  
 BnaA09.GH3-8.f TSSGEEKKIFPAND.NFEDILLGLALLSSLIMSK.....HV..DGYKQGVMIFFKFIQ  
 BnaA09.GH3-8.g TSSGNQKMFPRNN.NFENIKFAAALSSLVISK.....HV..HGYKQGVMIFFSFTQ  
 BnaAX.GH3-8.h .....YLENLKFIFYFYRSLVITK.....HI..DGLEHGKGMVFNFTCT  
 BnaAX.GH3-8.i TSSGNPKIFPATD.NFENIKSAGALNSLIMSK.....HV..AGYNGQGVMIFFRFTH  
 BnaC01.GH3-8.a TSSGKQKLIPMNDKYLENTKLTDFRSIVLSK.....HV..DGHNOGKSLKLLFTTG  
 BnaC02.GH3-8.b TSSGKRRKMFPRNNKYLENLKFIFYFYRSLVITK.....HI..DGLEHGKGMVFNFTCT  
 BnaC02.GH3-8.c TSSGKRRKMFPRNNKYLENLKFIFYFYRSLVITK.....HI..DGLEHGKGMVFNFTCT  
 BnaC02.GH3-8.d TSSGKRRKMFPRNNKYLENLKFIFYFYRSLVITK.....HI..DGLEHGKGMVFNFTCT  
 BnaC07.GH3-8.e TSSGKQKLIPLNKKYLENARLLFDLRYLVLSK.....HV..DGHNEGKGLHLIFLTK  
 BnaC09.GH3-8.f TSSGKQKIFPVNNKFFEDMAFIFALRSSLISK.....HI..EGDEKGVVVMLEFFAR  
 BnaCX.GH3-8.g TSSGNQKIFPANNIFFKNIQIFYTLGYLVMSK.....HF..NGYKQGVIRFTFTH  
 BnaA05.GH3-9.a TSSGEPKLMPITISEDLDRTTFVYNLINPIANK.....YL..EGLDKGKTMYLNFVK  
 BnaC04.GH3-9.a TSSGEPKLMPITISEDLDRTTFVYNLINPIANK.....YL..EGLDKGKTMYLNFVK  
 BnaA03.GH3-10.a TTEGRQKYVPFTCQITQALLQMSRLSAAAYTSR.....CY..PIIREGGMILEFIYAA  
 BnaA09.GH3-10.b TTEGRQKYVPFTCHSSQTTLQIFRLSAAAYRSR.....FY..PIKEGGRILEFIYAG  
 BnaC09.GH3-10.a TTEGRQKYVPFTRHSSQTTLQIFRLSAAAYRSR.....FY..PIKEGGRILEFIYAG  
 BnaA03.GH3-11.a TSGGRPKEFIPFTDELMENTLQLFRTAFAFRNR.....DE..PIDDNGRALQFIFFSS  
 BnaA04R.GH3-11.b TSGGRPKEFVPFTDELMENTLQLFRTAFAFRNR.....EE..PIDDNGRALQFIFFSS  
 BnaA05.GH3-11.c TSGGRPKEFVPFTDELMENTLQLFRTAFAFRNR.....EE..PIDDNGRALQFIFFSS  
 BnaC04.GH3-11.a TSGGRPKEFIPFTDELMENTLQLFRTAFAFRNR.....EE..PIDDNGRALQFIFFSS  
 BnaCX.GH3-11.b TSGGRPKEFIPFTDELMENTLQLFRTAFAFRNR.....DE..PIDDNGRALQFIFFSS  
 BnaA02.GH3-12.a TSGGAQKMMPWNKKYLDNLTFAYDLRMHVITK.....HV..KGLEQKGKMMFLFTK  
 BnaA03.GH3-12.b TSGGAQKMMPWNKKYLDNLTFAYDLRMHVITK.....HV..KGLEQKGKMMFLFTK  
 BnaA06.GH3-12.c TSGGANKILPSNNKFLDGYAFSNDLLVHIISK.....HV..KGVREKGMIFSLTGT  
 BnaA10.GH3-12.d TSGGAQKMMPWNKKYLDNLTFAYDLRMHVITK.....HV..KGLEQKGKMMFLFTK  
 BnaC02.GH3-12.a TSGGAQKMMPWNKKYLDNLTFAYDLRMHVITK.....HV..KGLEQKGKMMFLFTK  
 BnaC03.GH3-12.b TSGGAQKMMPWNKKYLDNLTFAYDLRMHVITK.....HV..KGLEQKGKMMFLFTK  
 BnaC09.GH3-12.c TSGGAQKMMPWNKKYLDNLTFAYDLRMHVITK.....HV..KGLEQKGKMMFLFTK  
 BnaA10.GH3-14.a TSGGVPKLIPLTAEDMEQRNLFVSLYRPLPFK.....HI..KGLSEGKSLLFYFLT  
 BnaC09.GH3-14.a TSGGVPKLIPLTAEDMEQRNLFVSLYRPLPFK.....HI..KGLSEGKSLLFYFLT  
 BnaA03.GH3-15.a TSGGVPKLIPMTAEELERQMLFSSLHRPLISK.....OI..EGISDGKSLSFFFVT  
 BnaC03.GH3-15.a TSGGVPKLIPMTAEELERQMLFSSLHRPLISK.....OI..EGISEGKSLSFFFVT  
 BnaAX.GH3-16.a TSGGYPKLIPLTAEDMEQRILFASLYAPLVFK.....HI..GGLTEGKSLMFYFVT  
 BnaC02.GH3-16.a TSGGYPKLIPLTAEDMEQRILFASLYAPLVFK.....HI..GGLTEGKSLMFYFVT  
 BnaA07.GH3-17.a TSAGKPKLMPSTAKELDRTTFYYSMLVPMNKN.....YV..NGLDEGKGMYLLEFIK  
 BnaA08.GH3-17.b TSGGKPKFMPSTAEELDRKTFYNNMLVPMNKN.....FV..NGLDEGKGMYLLEFIK  
 BnaA09.GH3-17.c TSAGKPKLMPSTAEELERKTIYYSMLVPMNKN.....YV..NGLDEGKGMYLLEFIK  
 BnaC08.GH3-17.a .....MPSTAEELDRKTFYNNMLVPMNKNSSYKNHKKHCS..NGLN..VGMYLLEFIK  
 BnaCX.GH3-17.b TSAGKPKLMPSTAKELDRTTFYYSMLVPMNKN.....YV..NGLGEKGMYLLEFIK  
 BnaCX.GH3-17.c TSAGKPKLMPSTAEELERKTIYYSMLVPMNKN.....YV..NGLDEGKGMYLLEFIK  
 BnaA05GH3-18.a TSSGKQKIFPVNDEAIEQLGYVLALRSLVMSK.....HE..SDNGVEQKTMFFHYTK  
 BnaCX.GH3-18.a TSSGNQKIFPANNIYFENQLFGYALSSAVMSK.....HV..DGYKQKAMVFFSFTH  
 BnaA06.GH3-19.a TSSGNQKIFPANNIYFENILFAFSLSSVMSK.....HV..EYKRGKVMFFFTQ  
 BnaA09.GH3-19.b TSSGNQKIYPTNNIYFENLLFGYALSSVMSK.....HV..DGYKQKMMIFRFTH  
 consensus>70 ts.g.k.k.p.....le.....y.l...v.....v...g.d.gk.m.f.f..

|                 | 160 | 170    | 180      | 190       | 200          | 210                       |
|-----------------|-----|--------|----------|-----------|--------------|---------------------------|
| AtGH3-1         | SE  | TKTPG  | GLPARPVL | TSYKSEHF  | RSRPYDPYNVY  | TSPNEAILCPDSFQSMYTMQLCG   |
| AtGH3-2         | SE  | SKTSG  | GLPARPVL | TSYKSDHF  | KRRPYDPYNVY  | TSPNEAILCPDSFQSMYTMQLCG   |
| AtGH3-3         | TE  | SKTPG  | GLPARPVL | TSYKSEQF  | KRRPNDPYNVY  | TSPNEAILCPDSFQSMYTMQLCG   |
| AtGH3-4         | SE  | STTSG  | GLPARPAL | TSYKSDYF  | RTSDSDSVY    | TSPKEAILCCDSFQSMYTMQLCG   |
| AtGH3-5         | SE  | SKTPG  | GLPARPVL | TSYKSSHF  | KERPYPYTNVY  | TSPNETILCPDSFQSMYTMQLCG   |
| AtGH3-6         | SE  | SKTPG  | GLPARPVL | TSYKSSHF  | KRRPYDPYTNVY | TSPNETILCPDSFQSMYTMQLCG   |
| AtGH3-7         | LE  | SITPS  | GLPARVAS | SSYLKSNYF | KNRPSNWWYSY  | TSPDEVTLCPDNKQSLYCHLLCG   |
| AtGH3-8         | SE  | NTTPS  | GLPSAAS  | TSEFKSDYF | KNRPSYWHWSY  | TSPDEVTLCPDNTQSLYCHLLCG   |
| AtGH3-9         | AE  | TSTPC  | GLPIRAVL | TSYKSKHF  | QCRPYDPFNDL  | TSPITQILCEDSNQSMYQQLLAG   |
| AtGH3-10        | KE  | EKTLG  | GLTVGTAT | THYASKEF  | KTQETTKSFT   | CSPQEVISGGDFGQCTYCHLLLG   |
| AtGH3-11        | KQ  | YISTG  | GVPVGTAT | TNVYRNPNF | KAGMKSITSPS  | CSPDEVIFSPDVHQALYCHLLSG   |
| AtGH3-12        | QE  | SMTPS  | GLPARVAT | SSYFKSDYF | KNRPSNWWYSY  | TSPDEVILCPDNNTQSLYCHLLCG  |
| AtGH3-13        | PE  | RETAS  | GILIRMTI | TCVLKSVN  | KTNSSLWDRLO  | ISPHHEISTCEDTQSMYQQLCG    |
| AtGH3-14        | RE  | SETAS  | GILVRTMI | TCVLKSVT  | PANSFIWDQSQ  | ISPHAITTCSDDTQSMYQQLCG    |
| AtGH3-15        | RE  | SKTAN  | GLMVRTMV | TSFLKSIK  | QTNFSLWDSLO  | VSPHAITTCADDTQSMYQQLCG    |
| AtGH3-16        | RE  | SETVS  | GLMVRFMV | TCVLKSVN  | PTNSFLWDRVQ  | ISPHAITTCEDTQSMYQQLCG     |
| AtGH3-17        | PE  | IKTPS  | GLMARPVL | TSYKSKHF  | RNRPFNKYNVY  | TSPDQITLCQDSKQSMYQQLCG    |
| AtGH3-18        | PI  | SATPS  | GLP      |           |              |                           |
| AtGH3-19        | LE  | SKTPS  | GLALSSSF | TSYFMSDYF | KNRSSKCNSEY  | TSPDOVILCPDNNQSVYCHLLCG   |
| BraX.GH3-1.a    | SE  | TKTPG  | GLPARPVL | TSYKSKDF  | RSRPYDPYNVY  | TSPNEAILCPDSFQSMYTMQLCG   |
| BraX.GH3-2.a    | SE  | SKTPG  | GLPARPVL | TSYKSDHF  | KRRPYDPYNVY  | TSPNEAILCPDSFQSMYTMQLCG   |
| BraA09.GH3-3.a  | SE  | SKTPG  | GLPARPVL | TSYKSEHF  | KRRPYDPYNVY  | TSPNEAILCPDSFQSMYTMQLCG   |
| BraA01.GH3-5.a  | SE  | SKTPG  | GLPARPVL | TSYKSSHF  | KERPFDYTNVY  | TSPNETILCPDSFQSMYTMQLCG   |
| BraA03.GH3-5.b  | SE  | SKTPG  | GLPARPVL | TSYKSSHF  | KERPFDYTDY   | TSPNETILCPDSFQSMYTMQLCG   |
| BraA02.GH3-6.a  | SE  | SKTPG  | GLPARPVL | TSYKSSHF  | KRRPYDPYTNVY | TSPNETILCPDSFQSMYTMQLCG   |
| BraA03.GH3-6.b  | SE  | SKTPG  | GLPARPVL | TSYKSSHF  | KRRPYDPYTNVY | TSPNETILCPDSFQSMYTMQLCG   |
| BraA06.GH3-7.a  | HD  | TKTPG  | GLPIEDGI | SWYLKSDYF | KNRPSYWHWSY  | TSPDEVMLGSDLKQSLYCHLLCG   |
| BraA08.GH3-7.b  | LE  | STTAS  | GLPARTAS | SSYLKSSYF | KNRPCNWWYTY  | TSPDEVILCPDNKQSLYCHLLCG   |
| BraA02.GH3-8.a  | PE  | QNTPS  | GLPASAT  | TSEFKSDYF | KNRPSYWHWSY  | TSPDEVILCPDNKQSLYCHLLCG   |
| BraA03.GH3-8.b  | PE  | QNTPS  | GLPASAT  | TSEFKSDYF | KNRPSYWHWSY  | TSPDEVILCPDNKQSLYCHLLCG   |
| BraA03.GH3-8.c  | PA  | SKTPS  | GLPASAT  | THLMKSDYF | VKNLPSYWDTS  | TSPTEIKFCPDNKQSLYCHLLCG   |
| BraA03.GH3-8.d  | PA  | SKTPS  | GLPASAT  | THLMKSDYF | VKNLPSYWDTS  | TSPTEIKFCPDNKQSLYCHLLCG   |
| BraA06.GH3-8.e  | PA  | STTPC  | GLPIAPVL | TSEFKSEY  | RLAKK...     | TSPDQIIMCPDTKQSMYQQLCG    |
| BraA06.GH3-8.f  | PI  | STTPG  | GLPIAPVL | TSEFKSEY  | RLAKK...     | TSPDQIIMCPDTKQSMYQQLCG    |
| BraA09.GH3-8.g  | EO  | SISPC  | GLPISTSV | TGYLLSDSF | KNRPSN...    | CFTSPDEVMLCPDLKQSMYQQLCG  |
| BraA09.GH3-8.h  | PI  | STTPC  | GLPIAPVL | TSEFKSEY  | RLAKK...     | TSPDQIIMCPDTKQSMYQQLCG    |
| BraA10.GH3-8.i  | PO  | STMPG  | GLPISTSV | TGYLLSDSF | KNRPSN...    | CFTSPDEVMLCPDLKQSMYQQLCG  |
| BraA09.GH3-10.a | KE  | EKTPG  | GLTVGTAT | THYSSKEF  | KTQETTKSFT   | CSPREVISGGDFGQCTYCHLLLG   |
| BraA03.GH3-11.a | KQ  | YISTG  | GVPVGTAT | TNVYRNPNF | KAGMKSITSPS  | CSPDEVIFSPDVHQALYCHLLSG   |
| BraA01.GH3-11.b | KQ  | YISTG  | GVPVGTAT | TNVYRNPNF | KAGMKSITSPS  | CSPDEVIFSPDVHQALYCHLLSG   |
| BraA05.GH3-11.c | KQ  | YISTG  | GVPVGTAT | TNVYRNPNF | KAGMKSITSPS  | CSPDEVIFSPDVHQALYCHLLSG   |
| BraA02.GH3-12.a | QE  | AITPS  | GLPARVAT | SSYFKSDYF | KNRPSNWWYSY  | TSPDEVILCPDNNTQSLYCHLLCG  |
| BraA03.GH3-12.b | QE  | AITPS  | GLPARVAT | SSYFKSDYF | KNRPSNWWYSY  | TSPDEVILCPDNNTQSLYCHLLCG  |
| BraA06.GH3-12.c | HE  | TKTPG  | GLPIESST | SWYLKSDYF | KNRPSNWWYSY  | TSPDEVMLGSDLKQSLYCHLLCG   |
| BraA10.GH3-12.d | QE  | TKTPS  | GLLARVAT | SSYFKSDYF | KNRPSNWWYSY  | TSPDEVILCPDNNTQSLYCHLLCG  |
| BraA10.GH3-14.a | RE  | SETAS  | RIPVRTMI | TCVLKSVT  | PANKFIWERIQ  | ISPIEATCPDNTQSMYQQLCG     |
| BraA03.GH3-15.a | RE  | GKTAS  | GLMVRTMV | TCVLKSVT  | SANKDWDQVQ   | ISPHGLYTCDDTQSMYQQLCG     |
| BraA07.GH3-15.b | KE  | SETAS  | GLMVRTMI | TCVLKSVT  | PANKFIWERIQ  | ISPIEATCPDNTQSMYQQLCG     |
| BraA02.GH3-16.a | RE  | SETAS  | GLMVRTMV | TCVLKSVT  | PANKFIWERIQ  | ISPIEATCPDNTQSMYQQLCG     |
| BraA07.GH3-17.a | PE  | IKTPS  | GLMARPVL | TSYKSKHF  | RNRPFNKYNVY  | TSPDQITLCQDSKQSMYQQLCG    |
| BraA09.GH3-17.b | PE  | IKTPS  | GLMARPVL | TSYKSKHF  | RNRPFNKYNVY  | TSPDQITLCQDSKQSMYQQLCG    |
| BraA03.GH3-17.c | PE  | IKTPS  | GLMARPVL | TSYKSKHF  | RNRPFNKYNVY  | TSPDQITLCQDSKQSMYQQLCG    |
| BraA04.GH3-19.a | AI  | SRTPS  | GLTVAPVL | TSFLMSNYF | KNWSSK...    | RYTSPDQVILCPDNKQSMYQQLCG  |
| BraA06.GH3-19.b | TI  | STTPC  | GLPIAPVL | TSEFKSEY  | RLAKK...     | TSPDQIIMCPDTKQSMYQQLCG    |
| BraA09.GH3-19.c | KI  | STTPC  | GLPIAPVL | TSEFKSEY  | RLAKK...     | TSPDQIIMCPDTKQSMYQQLCG    |
| BraA09.GH3-19.d | RI  | STTPC  | GLPIAPVL | TSEFKSEY  | RLAKK...     | TSPDQIIMCPDTKQSMYQQLCG    |
| BraAX.GH3-19.e  | PE  | STTPS  | GLPVAAAF | TSEFKSDYF | KNRPSN...    | SQYTSPDQVILCPDNKQSMYQQLCG |
| BolC09.GH3-1.a  | SE  | TKTPG  | GLPARPVL | TSYKSKDF  | RSRPYDPYNVY  | TSPNEAILCPDSFQSMYTMQLCG   |
| BolC01.GH3-2.a  | SE  | SKTPG  | GLPARPVL | TSYKSDHF  | KRRPYDPYNVY  | TSPNEAILCPDSFQSMYTMQLCG   |
| BolC08.GH3-3.a  | SE  | SKTPG  | GLPARPVL | TSYKSEHF  | KRRPYDPYNVY  | TSPNEAILCPDSFQSMYTMQLCG   |
| BolC01.GH3-5.a  | SE  | SKTPG  | GLPARPVL | TSYKSSHF  | KERPFDYTNVY  | TSPNETILCPDSFQSMYTMQLCG   |
| BolC07.GH3-5.b  | SE  | SKTPG  | GLPARPVL | TSYKSSHF  | KERPFDYTDY   | TSPNETILCPDSFQSMYTMQLCG   |
| BolC02.GH3-6.a  | SE  | SKTPG  | GLPARPVL | TSYKSSHF  | KRRPYDPYTNVY | TSPNETILCPDSFQSMYTMQLCG   |
| BolC03.GH3-6.b  | SE  | SKTPG  | GLPARPVL | TSYKSSHF  | KRRPYDPYTNVY | TSPNETILCPDSFQSMYTMQLCG   |
| BolC06.GH3-7.a  | HE  | TRTPG  | GLPIEPGT | SWYLKSDYF | KNRPSYWHWSY  | TSPDEVMLGSDLKQSLYCHLLCG   |
| BolC01.GH3-8.a  | PS  | SMTLP  | GLPASAT  | TSEFKSDYF | KNRPSYWHWSY  | TSPDEVILCPDNNTQSLYCHLLCG  |
| BolC03.GH3-8.b  | PE  | HTTTPS | GLPVSAAT | TSEFKSDYF | KNRPSYWHWSY  | TSPDEVILCPDNNTQSLYCHLLCG  |
| BolC07.GH3-8.c  | PA  | SKTPS  | GLPASAT  | THLMKSDYF | VKNLPSYWDTS  | TSPTEIKFCPDNKQSLYCHLLCG   |
| BolC08.GH3-8.d  | PI  | STTPC  | GLPIAPVL | TSEFKSEY  | RLAKK...     | TSPDQIIMCPDTKQSMYQQLCG    |
| BolC09.GH3-8.e  | PO  | STTPC  | GLPIAPVL | TSEFKSEY  | RLAKK...     | TSPDQIIMCPDTKQSMYQQLCG    |
| BolC09.GH3-10.a | KE  | EKTPG  | GLTVGTAT | THYSSKEF  | KTQETTKSFT   | CSPREVISGGDFGQCTYCHLLLG   |
| BolC03.GH3-11.a | KQ  | YISTG  | GVPVGTAT | TNVYRNPNF | KAGMKSITSPS  | CSPDEVIFSPDVHQALYCHLLSG   |
| BolC04.GH3-11.b | KQ  | YISTG  | GVPVGTAT | TNVYRNPNF | KAGMKSITSPS  | CSPDEVIFSPDVHQALYCHLLSG   |
| BolCX.GH3-11.c  | KQ  | YISTG  | GVPVGTAT | TNVYRNPNF | KAGMKSITSPS  | CSPDEVIFSPDVHQALYCHLLSG   |
| BolC03.GH3-12.a | QE  | SITPS  | GLPARVAT | SSYFKSDYF | KNRPSNWWYSY  | TSPDEVILCPDNNTQSLYCHLLCG  |
| BolC09.GH3-12.b | QE  | AKTPS  | GLLARVAT | SSYFKSDYF | KNRPSNWWYSY  | TSPDEVILCPDNNTQSLYCHLLCG  |
| BolC09.GH3-14.a | RE  | SETAS  | RIPVRTMI | TCVLKSVT  | PANKFIWERIQ  | ISPIEATCPDNTQSMYQQLCG     |
| BolC03.GH3-15.a | RE  | GKTAS  | GLMVRTMV | TCVLKSVT  | SANKDWDQVQ   | ISPHGLYTCDDTQSMYQQLCG     |
| BolCX.GH3-16.a  | RE  | SETAS  | GLMVRTMV | TCVLKSVT  | SANKDWDQVQ   | ISPHGLYTCDDTQSMYQQLCG     |
| BolC07.GH3-17.a | PE  | IKTPS  | GLMARPVL | TSYKSKHF  | RNRPFNKYNVY  | TSPDQITLCQDSKQSMYQQLCG    |
| BolC08.GH3-17.b | PE  | IKTPS  | GLMARPVL | TSYKSKHF  | RNRPFNKYNVY  | TSPDQITLCQDSKQSMYQQLCG    |
| BolC08.GH3-19.a | KI  | FTTPC  | GLPIAPVL | TSEFKSEY  | RLAKK...     | TSPDQIIMCPDTKQSMYQQLCG    |
| BnaA09R.GH3-1.a | SE  | TKTPG  | GLPARPVL | TSYKSKDF  | RSRPYDPYNVY  | TSPNEAILCPDSFQSMYTMQLCG   |
| BnaCX.GH3-1.a   | SE  | TKTPG  | GLPARPVL | TSYKSKDF  | RSRPYDPYNVY  | TSPNEAILCPDSFQSMYTMQLCG   |
| BnaA01.GH3-2.a  | SE  | SKTPG  | GLPARPVL | TSYKSDHF  | KRRPYDPYNVY  | TSPNEAILCPDSFQSMYTMQLCG   |
| BnaC01.GH3-2.a  | SE  | SKTPG  | GLPARPVL | TSYKSDHF  | KRRPYDPYNVY  | TSPNEAILCPDSFQSMYTMQLCG   |
| BnaA09.GH3-3.a  | SE  | SKTPG  | GLPARPVL | TSYKSEHF  | KRRPYDPYNVY  | TSPNEAILCPDSFQSMYTMQLCG   |
| BnaC08.GH3-3.a  | SE  | SKTPG  | GLPARPVL | TSYKSEHF  | KRRPYDPYNVY  | TSPNEAILCPDSFQSMYTMQLCG   |
| BnaA01.GH3-5.a  | SE  | SKTPG  | GLPARPVL | TSYKSSHF  | KERPFDYTNVY  | TSPNETILCPDSFQSMYTMQLCG   |
| BnaA03.GH3-5.b  | SE  | SKTPG  | GLPARPVL | TSYKSSHF  | KERPFDYTDY   | TSPNETILCPDSFQSMYTMQLCG   |
| BnaC01.GH3-5.a  | SE  | SKTPG  | GLPARPVL | TSYKSSHF  | KERPFDYTDY   | TSPNETILCPDSFQSMYTMQLCG   |
| BnaC07.GH3-5.b  | SE  | SKTPG  | GLPARPVL | TSYKSSHF  | KERPFDYTDY   | TSPNETILCPDSFQSMYTMQLCG   |
| BnaA03.GH3-6.a  | SE  | SKTPG  | GLPARPVL | TSYKSSHF  | KRRPYDPYTNVY | TSPNETILCPDSFQSMYTMQLCG   |
| BnaAX.GH3-6.b   | SE  | SKTPG  | GLPARPVL | TSYKSSHF  | KRRPYDPYTNVY | TSPNETILCPDSFQSMYTMQLCG   |
| BnaC03.GH3-6.a  | SE  | SKTPG  | GLPARPVL | TSYKSSHF  | KRRPYDPYTNVY | TSPNETILCPDSFQSMYTMQLCG   |
| BnaCX.GH3-6.b   | SE  | SKTPG  | GLPARPVL | TSYKSSHF  | KRRPYDPYTNVY | TSPNETILCPDSFQSMYTMQLCG   |
| BnaA06.GH3-7.a  | HD  | TKTPG  | GLPIEDGI | SWYLKSDYF | KNRPSYWHWSY  | TSPDEVMLGSDLKQSLYCHLLCG   |
| BnaA08.GH3-7.b  | LE  | STTAS  | GLPARTAS | SSYLKSSYF | KNRPCNWWYTY  | TSPDEVILCPDNKQSLYCHLLCG   |
| BnaC06.GH3-7.a  | HE  | TRTPG  | GLPIEPGT | SWYLKSDYF | KNRPSYWHWSY  | TSPDEVMLGSDLKQSLYCHLLCG   |
| BnaA03.GH3-8.a  | PE  | QNTPS  | GLPASAT  | TSEFKSDYF | KNRPSYWHWSY  | TSPDEVILCPDNKQSLYCHLLCG   |
| BnaA03.GH3-8.b  | PA  | SKTPS  | GLPASAT  | THLMKSDYF | VKNLPSYWDTS  | TSPTEIKFCPDNKQSLYCHLLCG   |
| BnaA03.GH3-8.c  | PA  | SKTPS  | GLPASAT  | THLMKSDYF | VKNLPSYWDTS  | TSPTEIKFCPDNKQSLYCHLLCG   |
| BnaA06.GH3-8.d  | PI  | STTPC  | GLPIAPVL | TSEFKSEY  | RLAKK...     | TSPDQIIMCPDTKQSMYQQLCG    |



BnaA06.GH3-8.e P H I S T T P G G L P L A P T V T S F T K S E Y F R S L P K N . . . . S P S P Y Q I I M C T D A K Q S M Y C Q L L C G  
 BnaA09.GH3-8.f P I I S T T P C G L P L A P S I T I I L M K S K N Y R S P G K R . . . . S T T P D E I I M C T D P K Q S M Y C Q L L C G  
 BnaA09.GH3-8.g P I I S T T P C G L P L A P A T T I I L L K S K N Y R S P A K N . . . . S T S P D E I I L C T D A K Q S M Y C Q L L C G  
 BnaAX.GH3-8.h P E Q N T P S G L P A S S A T T S F F K S D Y F K N R P S Y W H W S F T S P D E V I L C S D N K Q S L Y C H L L C G  
 BnaAX.GH3-8.i P I I S T T P C G L P L A S V V T I L M K S K H F L S M E K R . . . . S T I P K E I I R C P D K K Q S M Y C Q L L F G  
 BnaC01.GH3-8.a P S S M T L S G L P A S Y A S T F F F K S D Y F K N R P S F W D T S F T T P G E V I Y C P D V K Q S L Y C H L L C G  
 BnaC02.GH3-8.b P E Q N T P S G L P A S S A T T S F F K S D Y F K N R P S Y W H W S F T S P D E V I L C S D N K Q S L Y C H L L C G  
 BnaC02.GH3-8.c P E Q N T P S G L P A S S A T T S F F K S D Y F K N R P S Y W H W S F T S P D E V I L C S D N K Q S L Y C H L L C G  
 BnaC02.GH3-8.d P E Q N T P S G L P A S S A T T S F F K S D Y F K N R P S Y W H W S F T S P D E V I L C S D N K Q S L Y C H L L C G  
 BnaC07.GH3-8.e P A I S K T P S G L P A S Y A T T H F M K S D Y Y V K N L P S Y W D T S S T S P T E I K F C P D N K Q S L Y C H L L C G  
 BnaC09.GH3-8.f E O Q S I T P C G L P I S T S V T G Y L L S D S F K N R P S N . . . C F T S P D E V T L C P D V K Q T M Y C H L L C G  
 BnaCX.GH3-8.g P I I S T T P C G L P L A P T V T S F T K S E F F R S L P K N . . . . S P S P Y Q I I L C P D A K Q S M Y C Q L L C G  
 BnaA05.GH3-9.a A E T S T P C G L P I R T V L T S Y Y K S K H F Q C R P Y D P F N D L T S P I Q T I L C E D S N Q S M Y C Q L L A A  
 BnaC04.GH3-9.a A E T S T P C G L P I R T V L T S Y Y K S K H F Q C R P Y D P F N D L T S P I Q T I L C E D S N Q S M Y C Q L L A A  
 BnaA03.GH3-10.a K V F K T P G G L D V G T A T T L Y Y A S K E F K T K Q E A T K S F T C S P Q E V I S G G D F V Q C T Y C H L L L G  
 BnaA09.GH3-10.b K E F K T P G G L T V G T A T T H Y Y S S K E F K T K Q E T T K S F T C S P R E V I S G G D F G Q C T Y C H L L L G  
 BnaC09.GH3-10.a K E F K T P G G L T V G T A T T H Y Y S S K E F K T K Q E T T K S F T C S P R E V I S G G D F G Q C T Y C H L L L G  
 BnaA03.GH3-11.a K Q Y I S K G G V P V G T A T T N V Y R N P N F K A G M K S I Q S L C C S P D E V I F S P D V H Q A L Y C H L L S G  
 BnaA04R.GH3-11.b K Q Y I S T G G V P V G T A T T N V Y R N P N F K S G M R S I Q S L C C S P D E V I F S P D V H Q A L Y C H L L S G  
 BnaA05.GH3-11.c K Q Y I S T G G V P I G T A T T N V Y R N P N F K A G M R S I M S L C C S P D E V I F S P D V H Q A L Y C H L L S G  
 BnaC04.GH3-11.a K Q Y I S T G G V P V G T A T T N V Y R N P N F K S G M K S I Q S P C C S P D E V I F S P D V H Q A L Y C H L L S G  
 BnaCX.GH3-11.b K Q Y I S K G G V P V G T A T T N V Y R N P N F K A G M K A I Q S L C C S P D E V I F S P E V H Q A L Y C H L L S G  
 BnaA02.GH3-12.a Q E A I T P S G L P A R V A T S S Y F K S E Y F K N R P S N W Y Y S Y T S P D E V I L C S N N T Q S L Y C H L L C G  
 BnaA03.GH3-12.b Q E A I T P S G L P A R V A T S S Y F K S D Y F K N R P S N W Y Y S Y T S P D E V I L C S N N T Q S L Y C H L L C G  
 BnaA06.GH3-12.c H E T K T P G G L P I E S S T S W Y L K S D Y F K N R P S N W F Y S F T S P D E V M L G S D I K O N L Y C H L L C G  
 BnaA10.GH3-12.d Q E T K T P S G L L A R V A T S S Y F K S D Y F F T N R P S N W Y Y S Y T S P D E V I L C S N N T Q S L Y C H L L C G  
 BnaC02.GH3-12.a Q E A I T P S G L P A R V A T S S Y F K S D Y F K N R P S N W Y Y S Y T S P D E V I L C S N N T Q S L Y C H L L C G  
 BnaC03.GH3-12.b Q E S I T P S G L P A R V A T S S Y F K S D Y F K N R P S N W Y Y S Y T S P D E V I L C S N N T Q S L Y C H L L C G  
 BnaC09.GH3-12.c Q E A K T P S G L L A R V A T S S Y F K S D Y F K N R P S N W Y Y S Y T S P D E V I L C S N N T Q S L Y C H L L C G  
 BnaA10.GH3-14.a R E S E T A S R I P V R T M I T C V L K S V T . . . . . B A N K F I W E R I Q I S P I E I A T C P D T T Q S M Y C Q L L C G  
 BnaC09.GH3-14.a R E S E T A S R I P V R T M I T C V L K S V T . . . . . B A N K F I W E R I Q I S P I E I A T C P D T T Q S M Y C Q L L C G  
 BnaA03.GH3-15.a R E G K T A S G L M V R T M V T C V I K M A G . . . . . S A N K D I W D Q V Q I S P H G L Y T C D D T T Q S M Y C Q L L C G  
 BnaC03.GH3-15.a R E G K T A S G L M V R T M V T C V I K M A G . . . . . S A N K D I W D Q V Q I S P H G I Y T C D D T T Q S M Y C Q L L C G  
 BnaAX.GH3-16.a R E S E T A S G L I V R F M L T C V L K S V N . . . . . B S N I F L W D R V Q V S P H E I S T C V D T S Q A M Y C Q L L C G  
 BnaC02.GH3-16.a R E S E T A S G L I V R F M L T C V L K S V N . . . . . B S N I F L W D R V Q V S P H E I S T C V D T S Q A M Y C Q L L C G  
 BnaA07.GH3-17.a P E I K T P S G L M A R P V L T S Y Y K S Q H F R N R P F N K Y N V Y T S P D Q T I L C Q D S K Q S M Y C Q L L C G  
 BnaA08.GH3-17.b P E I K T P A G L Q A R P V L T S Y Y K S E Q F K N R P F N K Y N V I T S P N D A I L C E D S Q S M Y C Q L L C G  
 BnaA09.GH3-17.c P E I K T P S G L M A R P V L T S Y Y K S Q H F R N R P F N K Y N V Y T S P D Q T I L C Q D S K Q S M Y C Q L L C G  
 BnaC08.GH3-17.a P E I K T P S G L Q A R P V L T S Y Y K S E Q F K N R P F N K Y N V I T S P N D A I L C E D S Q S M Y C Q L L C G  
 BnaCX.GH3-17.b P E I K T P S G L M A R P V L T S Y Y K S Q H F R N R P F N K Y N I Y T S P D Q T I L C Q D S K Q S M Y C Q L L C G  
 BnaCX.GH3-17.c P E I K T P S G L M A R P V L T S Y Y K S Q H F R N R P F N K Y N V Y T S P D Q T I L C Q D S K Q S M Y C Q L L C G  
 BnaA05GH3-18.a P E S T T P S G L P V A A A F T . . . . .  
 BnaCX.GH3-18.a R I I S T T L C G L P . . . . .  
 BnaA06.GH3-19.a T I I S T T P C G L P L A P G L T S F I K S E Y Y R R L A K N . . . . S T S P Y Q I I L C P D T K Q S M Y C Q L L C G  
 BnaA09.GH3-19.b K I I S T T P C G L P I A P A L T S E T K S K Y Y S T M A K N . . . . N T S P Y E V A L C P D P K Q S M Y C Q L L C G  
 consensus>70 . e . . . t p . g l p . . . . . t . y . k s . . f . . . . . t s p . e . i . c . d . . q s m y c . l l c g

|                 | 220    | 230      | 240    | 250    | 260    | 270      |                 |           |         |          |         |
|-----------------|--------|----------|--------|--------|--------|----------|-----------------|-----------|---------|----------|---------|
| AtGH3-1         | LLDRLS | VLRVGA   | VFASGL | LRAIRF | FLQHLH | WSRFAHD  | TELGLDSEITDPSIR | QCMSGIL   | .K      |          |         |
| AtGH3-2         | LLMRHE | VLRVGA   | VFASGL | LRAIRF | FLQNNW | KELARD   | ISTGTLS         | SRIFDPAIK | NRMSKIL | TK       |         |
| AtGH3-3         | LLMRHE | VLRVGA   | VFASGL | LRAIRF | FLQNNW | KELADD   | ISTGTLS         | SRISDPAIK | ESMSKIL | TK       |         |
| AtGH3-4         | LLMRHE | VNRVGA   | VFPSSG | LRAIRF | FLQNNW | KELSQD   | ISTGTLS         | SRIFDHAIK | TRMSKIL | NK       |         |
| AtGH3-5         | LQQHQE | VLRVGA   | VFASGF | IRAIK  | FLEKHW | TELVRD   | IRTGTLS         | SLITDPS   | VREAVAK | IL.K     |         |
| AtGH3-6         | LQQHQE | VLRVGA   | VFASGF | IRAIK  | FLEKHW | TELVRD   | IRTGTLS         | SEITDPS   | VREAVAK | IL.K     |         |
| AtGH3-7         | LVORNE | VTRMGS   | IFASVM | VRAIK  | FLED   | SWEELCSN | IRSGQL          | SEWITD    | IGCRDS  | VSLVLGG  |         |
| AtGH3-8         | LVORDD | VVKVGA   | AFVTIL | VRAIN  | LLEN   | SWKEICTN | IRFGHL          | SEWITD    | ISCRDS  | VSKILGE  |         |
| AtGH3-9         | LIHRHK | VMRVGA   | VFASAF | LRAIS  | YLEKKW | SQLCED   | IRTGSL          | NPMITD    | PGCOMAM | SCLLMS   |         |
| AtGH3-10        | LHYS   | SQVEFVAS | AFSYTI | VQAFS  | FFFEI  | WREICAD  | IKEGNL          | SSRITL    | PKMRKA  | VLAALIR. |         |
| AtGH3-11        | ILFRDQ | VQYVFA   | FAHGLV | VHAFRT | TFEQV  | WEEI     | IVTDIK          | DGVL      | SNRITV  | PSVRTAM  | SKLLT.  |
| AtGH3-12        | LVORDE | VVRIGS   | IFASVM | VRAIK  | FLED   | SWEELCSN | IRSGHL          | SNWVTD    | DLGCNS  | VSLVLGG  |         |
| AtGH3-13        | LLORDN | VARLGA   | PFASVF | IRVIK  | YLEGH  | WQELCSN  | IRTCRL          | SDWITD    | PQCVSG  | ISKFLTA  |         |
| AtGH3-14        | LLORDN | VGRVGA   | PFASVF | IRVIK  | YLEGH  | WQELCSN  | IRTCRL          | SDWITD    | PQCVSG  | ISKFLTA  |         |
| AtGH3-15        | LLERDN | VARLGA   | PFASVF | IRVIK  | YLEGH  | WQELCSN  | IRTCRL          | SDWITD    | PQCVSG  | ISKFLTA  |         |
| AtGH3-16        | LLORDE | VVRIGS   | IFASVM | VRAIK  | FLED   | SWEELCSN | IRSGHL          | SNWVTD    | DLGCNS  | VSLVLGG  |         |
| AtGH3-17        | LVORSH | VLRVGA   | VFASAF | LRAVK  | FLED   | HYKELCAD | IRTGTIT         | SWITD     | SSCRDS  | VLSILNG  |         |
| AtGH3-18        | ...RDE | VVRVGA   | AFVIL  | VRAIK  | FLEKHW | KELCSN   | IRSGHV          | SEWITD    | LEGRNA  | VSVILRG  |         |
| AtGH3-19        | LSQREK | VVGVSAT  | FAHALI | KAIRN  | ALQIY  | WKESSN   | IRSGHV          | SEWITD    | DLCKNA  | VSAIILGG |         |
| BraX.GH3-1.a    | LLDRLS | VLRVGA   | VFASGL | LRAIRF | FLQHLH | WSRLAYD  | IELGLDSEITDPSIR | QCMSDIL   | .K      |          |         |
| BraX.GH3-2.a    | LLMRHD | VLRVGA   | VFASGL | LRAIRF | FLQNNW | KELARD   | ISTGTLS         | SRISDPAIK | NRMSKIL | TK       |         |
| BraA09.GH3-3.a  | LLMRHE | VLRVGA   | VFASGL | LRAIRF | FLQNNW | KELVND   | ISTGTLS         | SRISDPAIK | ESMSKIL | TK       |         |
| BraA01.GH3-5.a  | LQQHQE | VLRVGA   | VFASGF | IRAIK  | FLEKHW | TELVRD   | IRTGTLS         | SSITDPS   | VREAVAK | IL.K     |         |
| BraA03.GH3-5.b  | LQQHQE | VLRVGA   | VFASGF | IRAIK  | FLEKHW | TELVRD   | IRTGTLS         | SLITDPS   | VREAVAK | IL.K     |         |
| BraA02.GH3-6.a  | LQQHQE | VLRVGA   | VFASGF | IRAIK  | FLEKHW | TELVRD   | IRTGTLS         | SEITDPS   | VREAVAK | IL.K     |         |
| BraA03.GH3-6.b  | LQQHQE | VLRVGA   | VFASGF | IRAIK  | FLEKHW | TELVRD   | IRTGTLS         | SEITDPS   | VREAVAK | IL.K     |         |
| BraA06.GH3-7.a  | LVORNE | VTRIGS   | IFASGM | VRVVK  | LED    | SWKELCSN | IRSGNL          | SEWITD    | SGCRNS  | VSLVLGG  |         |
| BraA08.GH3-7.b  | LVORNE | VTRMGS   | IFASGM | VRVVK  | LED    | SWKELCSN | IRSGNL          | SEWITD    | SGCRNS  | VSLVLGG  |         |
| BraA02.GH3-8.a  | LVORDE | VVKVGA   | AFVIL  | VRAIK  | FLEKHW | KELCSN   | IRSGHL          | SEWITD    | ISCRDS  | VSKILGE  |         |
| BraA03.GH3-8.b  | LVORDE | VVKVGA   | AFVIL  | VRAIK  | FLEKHW | KELCSN   | IRSGHL          | SEWITD    | ISCRDS  | VSKILGE  |         |
| BraA03.GH3-8.c  | LVORDE | VTRVSA   | AFVIL  | VRAIK  | FLEKHW | KELCSN   | IRSGHL          | SEWITD    | ISCRDS  | VSKILGE  |         |
| BraA03.GH3-8.d  | LVORDE | VTRVSA   | AFVIL  | VRAIK  | FLEKHW | KELCSN   | IRSGHL          | SEWITD    | ISCRDS  | VSKILGE  |         |
| BraA06.GH3-8.e  | LVORDD | VVS      | VGA    | AFVIL  | VRAIK  | FLEKHW   | KELCSN          | IRSGHL    | SEWITD  | ISCRDS   | VSKILGE |
| BraA06.GH3-8.f  | LVORDE | VASVGA   | AFVIL  | VRAIK  | FLEKHW | KELCSN   | IRSGHL          | SEWITD    | ISCRDS  | VSKILGE  |         |
| BraA09.GH3-8.g  | LVORDE | VVA      | VGA    | AFVIL  | VRAIK  | FLEKHW   | KELCSN          | IRSGHL    | SEWITD  | ISCRDS   | VSKILGE |
| BraA09.GH3-8.h  | LVORDE | VVS      | VGA    | AFVIL  | VRAIK  | FLEKHW   | KELCSN          | IRSGHL    | SEWITD  | ISCRDS   | VSKILGE |
| BraA10.GH3-8.i  | LVORDE | VVN      | VGA    | AFVIL  | VRAIK  | FLEKHW   | KELCSN          | IRSGHL    | SEWITD  | ISCRDS   | VSKILGE |
| BraA09.GH3-10.a | LHFS   | SQVEFVAS | AFSYTI | VQAFS  | FFFEI  | WREICAD  | IKEGNL          | SSRITL    | PKMRKA  | VLAALIR. |         |
| BraA03.GH3-11.a | ILFRDQ | VQYVFA   | FAHGLV | VHAFRT | TFEQV  | WEEI     | IVTDIK          | DGVL      | SNRITV  | PSVRTAM  | SKLLR.  |
| BraA04.GH3-11.b | ILFRDQ | VQYVFA   | FAHGLV | VHAFRT | TFEQV  | WEEI     | IVTDIK          | DGVL      | SNRITV  | PSVRTAM  | SKLLR.  |
| BraA05.GH3-11.c | ILFRDQ | VQYVFA   | FAHGLV | VHAFRT | TFEQV  | WEEI     | IVTDIK          | DGVL      | SNRITV  | PSVRTAM  | SKLLR.  |
| BraA02.GH3-12.a | LVORDE | VVRMGS   | IFASVM | VRAIK  | FLET   | YWEELCSN | IRSGHL          | SEWITD    | LGCRSS  | VSLVLGG  |         |
| BraA03.GH3-12.b | LVORDE | VVRMGS   | IFASVM | VRAIK  | FLET   | YWEELCSN | IRSGHL          | SEWITD    | LGCRSS  | VSLVLGG  |         |
| BraA06.GH3-12.c | LVORDE | VVRMGS   | IFASVM | VRAIK  | FLET   | YWEELCSN | IRSGHL          | SEWITD    | LGCRSS  | VSLVLGG  |         |
| BraA10.GH3-12.d | LVORDE | VVRMGS   | IFASVM | VRAIK  | FLET   | YWEELCSN | IRSGHL          | SEWITD    | LGCRSS  | VSLVLGG  |         |
| BraA10.GH3-14.a | LTORGN | VSRVGA   | AFVIL  | VRAIK  | FLEKHW | KELCSN   | IRSGHL          | SEWITD    | LGCRSS  | VSLVLGG  |         |
| BraA03.GH3-15.a | LTORGN | VSRVGA   | AFVIL  | VRAIK  | FLEKHW | KELCSN   | IRSGHL          | SEWITD    | LGCRSS  | VSLVLGG  |         |
| BraA07.GH3-15.b | LTORGN | VSRVGA   | AFVIL  | VRAIK  | FLEKHW | KELCSN   | IRSGHL          | SEWITD    | LGCRSS  | VSLVLGG  |         |
| BraA02.GH3-16.a | LVORNE | VARLGA   | PFASVF | IRVIK  | YLEGH  | WQELCSN  | IRTCRL          | SDWITD    | PQCVSG  | ISKFLTA  |         |
| BraA07.GH3-17.a | LVORSH | VLRVGA   | VFASAF | LRAVK  | FLED   | HYKELCAD | IRTGTIT         | SWITD     | SACRDS  | VLSILDC  |         |
| BraA09.GH3-17.b | LVORSH | VLRVGA   | VFASAF | LRAVK  | FLED   | HYKELCAD | IRTGTIT         | SWITD     | SACRDS  | VLSILDC  |         |
| BraA09.GH3-17.c | LVORSD | VLRVGA   | VFASAF | LRAVK  | FLED   | HYKELCAD | IRTGTIT         | SWITD     | SACRDS  | VLSILDC  |         |
| BraA04.GH3-19.a | LVORDE | VVS      | VGA    | AFVIL  | VRAIK  | FLEKHW   | KELCSN          | IRSGHL    | SEWITD  | ISCRDS   | VSKILGE |
| BraA06.GH3-19.b | LVORDE | VVS      | VGA    | AFVIL  | VRAIK  | FLEKHW   | KELCSN          | IRSGHL    | SEWITD  | ISCRDS   | VSKILGE |
| BraA09.GH3-19.c | LVORDE | VVS      | VGA    | AFVIL  | VRAIK  | FLEKHW   | KELCSN          | IRSGHL    | SEWITD  | ISCRDS   | VSKILGE |
| BraA09.GH3-19.d | LVORDE | VVS      | VGA    | AFVIL  | VRAIK  | FLEKHW   | KELCSN          | IRSGHL    | SEWITD  | ISCRDS   | VSKILGE |
| BraA09.GH3-19.e | LVORDE | VVS      | VGA    | AFVIL  | VRAIK  | FLEKHW   | KELCSN          | IRSGHL    | SEWITD  | ISCRDS   | VSKILGE |
| BolC09.GH3-1.a  | LLDRLS | VLRVGA   | VFASGL | LRAIRF | FLQHLH | WSRLAND  | IESGLDSEITDPSIR | QCMSDIL   | .K      |          |         |
| BolC01.GH3-2.a  | LLMRHD | VLRVGA   | VFASGL | LRAIRF | FLQNNW | KELARD   | ISTGTLS         | SRISDPAIK | NRMSKIL | TK       |         |
| BolC08.GH3-3.a  | LLMRHE | VLRVGA   | VFASGL | LRAIRF | FLQNNW | KELVND   | ISTGTLS         | SRISDPAIK | ESMSKIL | TK       |         |
| BolC01.GH3-5.a  | LQQHQE | VLRVGA   | VFASGF | IRAIK  | FLEKHW | TELVRD   | IRTGTLS         | SSITDPS   | VREAVAK | IL.K     |         |
| BolC07.GH3-5.b  | LQQHQE | VLRVGA   | VFASGF | IRAIK  | FLEKHW | TELVRD   | IRTGTLS         | SLITDPS   | VREAVAK | IL.K     |         |
| BolC02.GH3-6.a  | LQQHQE | VLRVGA   | VFASGF | IRAIK  | FLEKHW | TELVRD   | IRTGTLS         | SEITDPS   | VREAVAK | IL.K     |         |
| BolC03.GH3-6.b  | LQQHQE | VLRVGA   | VFASGF | IRAIK  | FLEKHW | TELVRD   | IRTGTLS         | SEITDPS   | VREAVAK | IL.K     |         |
| BolC06.GH3-7.a  | LVORNE | VTRIGS   | IFASGM | VRVVK  | LED    | SWKELCSN | IRSGNL          | SEWITD    | SGCRNS  | VSLVLGG  |         |
| BolC01.GH3-8.a  | LVORNE | VTRIGS   | IFASGM | VRVVK  | LED    | SWKELCSN | IRSGNL          | SEWITD    | SGCRNS  | VSLVLGG  |         |
| BolC03.GH3-8.b  | LVORDE | VVKVGA   | AFVIL  | VRAIK  | FLEKHW | KELCSN   | IRSGHL          | SEWITD    | ISCRDS  | VSKILGE  |         |
| BolC07.GH3-8.c  | LVORDE | VVKVGA   | AFVIL  | VRAIK  | FLEKHW | KELCSN   | IRSGHL          | SEWITD    | ISCRDS  | VSKILGE  |         |
| BolC08.GH3-8.d  | LVORDE | VVKVGA   | AFVIL  | VRAIK  | FLEKHW | KELCSN   | IRSGHL          | SEWITD    | ISCRDS  | VSKILGE  |         |
| BolC09.GH3-8.e  | LVORDE | VVKVGA   | AFVIL  | VRAIK  | FLEKHW | KELCSN   | IRSGHL          | SEWITD    | ISCRDS  | VSKILGE  |         |
| BolC09.GH3-10.a | LHFS   | SQVEFVAS | AFSYTI | VQAFS  | FFFEI  | WREICAD  | IKEGNL          | SSRITL    | PKMRKA  | VLAALIR. |         |
| BolC03.GH3-11.a | ILFRDQ | VQYVFA   | FAHGLV | VHAFRT | TFEQV  | WEEI     | IVTDIK          | DGVL      | SNRITV  | PSVRTAM  | SKLLS.  |
| BolC04.GH3-11.b | ILFRDQ | VQYVFA   | FAHGLV | VHAFRT | TFEQV  | WEEI     | IVTDIK          | DGVL      | SNRITV  | PSVRTAM  | SKLLS.  |
| BolCX.GH3-11.c  | ILFRDQ | VQYVFA   | FAHGLV | VHAFRT | TFEQV  | WEEI     | IVTDIK          | DGVL      | SNRITV  | PSVRTAM  | SKLLS.  |
| BolC03.GH3-12.a | LVORDE | VVRMGS   | IFASVM | VRAIK  | FLET   | YWEELCSN | IRSGHL          | SEWITD    | LGCRSS  | VSLVLGG  |         |
| BolC09.GH3-12.b | LVORDE | VVRMGS   | IFASVM | VRAIK  | FLET   | YWEELCSN | IRSGHL          | SEWITD    | LGCRSS  | VSLVLGG  |         |
| BolC09.GH3-14.a | LTORGN | VSRVGA   | AFVIL  | VRAIK  | FLEKHW | KELCSN   | IRSGHL          | SEWITD    | LGCRSS  | VSLVLGG  |         |
| BolC03.GH3-15.a | LTORGN | VSRVGA   | AFVIL  | VRAIK  | FLEKHW | KELCSN   | IRSGHL          | SEWITD    | LGCRSS  | VSLVLGG  |         |
| BolCX.GH3-16.a  | LVORNE | VARLGA   | PFASVF | IRVIK  | YLEGH  | WQELCSN  | IRTCRL          | SDWITD    | PQCVSG  | ISKFLTA  |         |
| BolC07.GH3-17.a | LVORSH | VLRVGA   | VFASAF | LRAVK  | FLED   | HYKELCAD | IRTGTIT         | SWITD     | SACRDS  | VLSILEG  |         |
| BolC08.GH3-17.b | LVORSH | VLRVGA   | VFASAF | LRAVK  | FLED   | HYKELCAD | IRTGTIT         | SWITD     | SACRDS  | VLSILEG  |         |
| BolC08.GH3-19.a | LVORDE | VVS      | VGA    | AFVIL  | VRAIK  | FLEKHW   | KELCSN          | IRSGHL    | SEWITD  | ISCRDS   | VSKILGE |
| BnaA09R.GH3-1.a | LLDRLS | VLRVGA   | VFASGL | LRAIRF | FLQHLH | WSRLAND  | IESGLDSEITDPSIR | QCMSDIL   | .K      |          |         |
| BnaCX.GH3-1.a   | LLDRLS | VLRVGA   | VFASGL | LRAIRF | FLQHLH | WSRLAND  | IESGLDSEITDPSIR | QCMSDIL   | .K      |          |         |
| BnaA01.GH3-2.a  | LLMRHD | VLRVGA   | VFASGL | LRAIRF | FLQNNW | KELARD   | ISTGTLS         | SRISDPAIK | NRMSKIL | TK       |         |
| BnaA01.GH3-2.a  | LLMRHD | VLRVGA   | VFASGL | LRAIRF | FLQNNW | KELARD   | ISTGTLS         | SRISDPAIK | NRMSKIL | TK       |         |
| BnaA09.GH3-3.a  | LLMRHE | VLRVGA   | VFASGL | LRAIRF | FLQNNW | KELVND   | ISTGTLS         | SRISDPAIK | ESMSKIL | TK       |         |
| BnaC08.GH3-3.a  | LLMRHE | VLRVGA   | VFASGL | LRAIRF | FLQNNW | KELVND   | ISTGTLS         | SRISDPAIK | ESMSKIL | TK       |         |
| BnaA01.GH3-5.a  | LQQHQE | VLRVGA   | VFASGF | IRAIK  | FLEKHW | TELVRD   | IRTGTLS         | SSITDPS   | VREAVAK | IL.K     |         |
| BnaA03.GH3-5.b  | LQQHQE | VLRVGA   | VFASGF | IRAIK  | FLEKHW | TELVRD   | IRTGTLS         | SSITDPS   | VREAVAK | IL.K     |         |
| BnaC01.GH3-5.a  | LQQHQE | VLRVGA   | VFASGF | IRAIK  | FLEKHW | TELVRD   | IRTGTLS         | SSITDPS   | VREAVAK | IL.K     |         |
| BnaC07.GH3-5.b  | LQQHQE | VLRVGA   | VFASGF | IRAIK  | FLEKHW | TELVRD   | IRTGTLS         | SSITDPS   | VREAVAK | IL.K     |         |
| BnaA03.GH3-6.a  | LQQHQE | VLRVGA   | VFASGF | IRAIK  | FLEKHW | TELVRD   | IRTGTLS         | SEITDPS   | VREAVAK | IL.K     |         |
| BnaAX.GH3-6.b   | LQQHQE | VLRVGA   | VFASGF | IRAIK  | FLEKHW | TELVRD   | IRTGTLS         | SEITDPS   | VREAVAK | IL.K     |         |
| BnaC03.GH3-6.a  | LQQHQE | VLRVGA   | VFASGF | IRAIK  | FLEKHW | TELVRD   | IRTGTLS         | SEITDPS   | VREAVAK | IL.K     |         |
| BnaCX.GH3-6.b   | LQQHQE | VLRVGA   | VFASGF | IRAIK  | FLEKHW | TELVRD   | IRTGTLS         | SEITDPS   | VREAVAK | IL.K     |         |
| BnaA06.GH3-7.a  | LVORNE | VTRIGS   | IFASGM | VRVVK  | LED    | SWKELCSN | IRSGNL          | SEWITD    | SGCRNS  | VSLVLGG  |         |
| BnaA08.GH3-7.b  | LVORNE | VTRIGS   | IFASGM | VRVVK  | LED    | SWKELCSN | IRSGNL          | SEWITD    | SGCRNS  | VSLVLGG  |         |
| BnaC06.GH3-7.a  | LVORNE | VTRIGS   | IFASGM | VRVVK  | LED    | SWKELCSN | IRSGNL          | SEWITD    | SGCRNS  | VSLVLGG  |         |
| BnaA03.GH3-8.a  | LVORDE | VVKVGA   | AFVIL  | VRAIK  | FLEKHW | KELCSN   | IRSGHL          | SEWITD    | ISCRDS  | VSKILGE  |         |
| BnaA03.GH3-8.b  | LVORDE | VVKVGA   | AFVIL  | VRAIK  | FLEKHW | KELCSN   | IRSGHL          | SEWITD    | ISCRDS  | VSKILGE  |         |
| BnaA03.GH3-8.c  | LVORDE | VVKVGA   | AFVIL  | VRAIK  | FLEKHW | KELCSN   | IRSGHL          | SEWITD    | ISCRDS  | VSKILGE  |         |
| BnaA06.GH3-8.d  | LVORDE | VVKVGA   | AFVIL  | VRAIK  | FLEKHW | KELCSN   | IRSGHL          | SEWITD    | ISCRDS  | VSKILGE  |         |

BnaA06.GH3-8.e LVQRDEVASVGAVFAAVLVQVIHFLENYWKELASNIRFGHVSSEWITDLSCRDSDSVSTVLVE  
 BnaA09.GH3-8.f LVQRDEVVSVGALFASVLVQIIRFILEKYWKELCSNIRSGRLSDWITDHCCRDSDSVSILGE  
 BnaA09.GH3-8.g LVQRDEVSVGAPFASLLVQVIHFLENYWKELCSNIRSGHVSSEWITDLSCRDSDSVSMIVGE  
 BnaAX.GH3-8.h LVQRDEVVKVGAAAFVSIILVRAITFLEKFWKEICTNIRCGHLSSEWITDISCRDSDSVSKILGE  
 BnaAX.GH3-8.i LVQRD.....ELARNIRSGHLSSEWITDLSCRDSDSVSILGE  
 BnaC01.GH3-8.a LVMRDEVTGIGAVFASIFVQGMIFLEKTWKDMCSNIRSGQLSDWITDLGCRDSDSVSKILGG  
 BnaC02.GH3-8.b IVQRDEVVKVGAAAFVSIILVRAITFLEKFWKEICTNIRCGHLSSEWITDISCRDSDSVSKILGE  
 BnaC02.GH3-8.c IVQRDEVVKVGAAAFVSIILVRAITFLEKFWKEICTNIRCGHLSSEWITDISCRDSDSVSKILGE  
 BnaC02.GH3-8.d IVQRDEVVKVGAAAFVSIILVRAITFLEKFWKEICTNIRCGHLSSEWITDISCRDSDSVSKILGE  
 BnaC07.GH3-8.e LVLQRDEVTRVSAFASILVQGITFLENFWKEMCSNIRSGQLSYWITD.NCKDSDSVSMILGG  
 BnaC09.GH3-8.f LRQRDEVVMAAASFASSLVGAFTFESYWKELCSNIRSGNVSEWITDLSCREAVTNILGG  
 BnaCX.GH3-8.g LVQRDEVVSVGAVFASVLVQVIHFLENYWKELASNIRCGHVSSEWITDLSCRETVTTLVE  
 BnaA05.GH3-9.a LIHRHKVMRLGAVFASAFLRRAISYLERKWSQLCQDIRTGHLSPMITDPGCGTAMSSLLAS  
 BnaC04.GH3-9.a LIHRHKVMRLGAVFASAFLRRAISYLERKWSQLCQDIRTGHLSPMITDPGCGTAMTSLLAS  
 BnaA03.GH3-10.a LHFSSQVDFVASGFAYTIVQAFSFLLENWREICADIKENLSSRITLPMRMTAVLALLIR.  
 BnaA09.GH3-10.b LHFSSQVDFVASGFAYTIVQAFSFLFEDTWRDICADIKESLSSRITLPMRMTAVLALLIR.  
 BnaC09.GH3-10.a LHFSSQVDFVASGFAYTIVQAFSFLFEDTWRDICADIKESLSSRITLPMRMTAVLALLIR.  
 BnaA03.GH3-11.a ILFRDQVQYVFASFAGHLVHAFTTFEQVWEIEIVTDIEDGVLSRITVPSVRSAMSKLLR.  
 BnaA04R.GH3-11.b ILFRHQVQYVFASFAGHLVHAFTTFEQVWEIEIVADIKEGVLTSTRITVPSVRSAMSKLLR.  
 BnaA05.GH3-11.c ILFRDQVQYVFASFAGHLVHAFTTFEQVWEIEIVTDIKHGVLSRITVPSLRAAMSKLLITA  
 BnaC04.GH3-11.a ILFRDQVQYVFASFAGHLVHAFTTFEQVWEIEIVTDIKEGVLTSTRITVPSVRSAMSKLLR.  
 BnaCX.GH3-11.b ILFRDQVQYVFASFAGHLVHAFTTFEQVWEIEIVTDIEDGVLSRITVPSVRSAMSKLLSG  
 BnaA02.GH3-12.a LVQRDEVVRMGSIIFASVMVRAIKFLETYWEELCSNIRSGHLSSEWITDLGCRSSVSLVLGG  
 BnaA03.GH3-12.b LVQRDEVVRMGSIIFASVMVRAIKFLETYWEELCSNIRSGHLSSEWITDLGCRSSVSLVLGG  
 BnaA06.GH3-12.c LVQRDEVVRMGSIIFASVMVRAIKFLETYWEELCSNIRSGHLSSEWITDLGCRSSVSLVLGG  
 BnaA10.GH3-12.d LVQRDEVVRMGSIIFASVMVRAIKFLETYWEELCSNIRSGHLSSEWITDLGCRSSVSLVLGG  
 BnaC02.GH3-12.a LVQRDEVVRMGSIIFASVMVRAIKFLETYWEELCSNIRSGHLSSEWITDLGCRSSVSLVLGG  
 BnaC03.GH3-12.b LVQRDEVVRMGSIIFASVMVRAIKFLETYWEELCSNIRSGHLSSEWITDLGCRSSVSLVLGG  
 BnaC09.GH3-12.c LVQRDEVVRMGSIIFASVMVRAIKFLETYWEELCSNIRSGHLSSEWITDLGCRSSVSLVLGG  
 BnaA10.GH3-14.a LIORGNVSRIGAPFASFLKVINFLGDHWSLELCSNIRSGHLSSEWITDLGCRSSVSLVLGG  
 BnaC09.GH3-14.a LIORGNVSRIGAPFASFLKVINFLGDHWSLELCSNIRSGHLSSEWITDLGCRSSVSLVLGG  
 BnaA03.GH3-15.a LIQRENSRLGAPFASFLKVINFLGDHWSLELCSNIRSGHLSSEWITDLGCRSSVSLVLGG  
 BnaC03.GH3-15.a LIQRENSRLGAPFASFLKVINFLGDHWSLELCSNIRSGHLSSEWITDLGCRSSVSLVLGG  
 BnaAX.GH3-16.a LVQRDEVVARLGAPFASFLKVINFLGDHWSLELCSNIRSGHLSSEWITDLGCRSSVSLVLGG  
 BnaC02.GH3-16.a LVQRDEVVARLGAPFASFLKVINFLGDHWSLELCSNIRSGHLSSEWITDLGCRSSVSLVLGG  
 BnaA07.GH3-17.a LVQRSHVLRVGTVFASAFLRRAVVFLENDHYKELCADIRTGTVTSWITEPACRSDSVLSVLQG  
 BnaA08.GH3-17.b LVQRSHVLRVGTVFASAFLRRAVVFLENDHYKELCADIRTGTVTSWITEPACRSDSVLSVLQG  
 BnaA09.GH3-17.c LVQRSHVLRVGTVFASAFLRRAVVFLENDHYKELCADIRTGTVTSWITEPACRSDSVLSVLQG  
 BnaC08.GH3-17.a LVQRSHVLRVGTVFASAFLRRAVVFLENDHYKELCADIRTGTVTSWITEPACRSDSVLSVLQG  
 BnaCX.GH3-17.b LVQRSHVLRVGTVFASAFLRRAVVFLENDHYKELCADIRTGTVTSWITEPACRSDSVLSVLQG  
 BnaCX.GH3-17.c LVQRSHVLRVGTVFASAFLRRAVVFLENDHYKELCADIRTGTVTSWITEPACRSDSVLSVLQG  
 BnaA05GH3-18.a ...NEVVRFGATFAHALVRAIDFLESNWKELCSNIRSGHLSSEWITDLGCRSSVSAIIGG  
 BnaCX.GH3-18.a ...NEVVRFGATFAHALVRAIDFLESNWKELCSNIRSGHLSSEWITDLGCRSSVSAIIGG  
 BnaA06.GH3-19.a LVQRDEVVSVGSVFASVLVQVIHFLENYWKELASNIRSGHLSSEWITDLSCRETSTILVE  
 BnaA09.GH3-19.b LVQRDEVVSVGTTFPSVLVQIVHFLENYWKELSSNIRSGHLSSEWITDLSCRETSTILVE  
 consensus>70 l..r.ev...ga.fas....i.file..w.el..#ir.G.ls..!td...r..v..il..



|                 | 280            | 290          | 300    | 310          | 320                     |
|-----------------|----------------|--------------|--------|--------------|-------------------------|
| AtGH3-1         | PDQVLAEFIRRE   | C.KSDN       | WEKII  | TRIWPNTKYLDV | IVTGAMAQYIPTLEYYS.GG.   |
| AtGH3-2         | PDQELAEFLVGV   | C.SQEN       | WEGII  | TKIWPNTKYLDV | IVTGAMAQYIPTLEYYS.GG.   |
| AtGH3-3         | PDQELADFLITSV  | C.GQDN       | WEGII  | TKIWPNTKYLDV | IVTGAMAQYIPMLEYYS.GG.   |
| AtGH3-4         | PDQELAEFLIGVC  | C.SQEN       | WEGII  | TKIWPNTKYLDV | IVTGAMAQYIPMLEYYS.GG.   |
| AtGH3-5         | PSPKLADFVEFEC  | C.KKKS       | WQGIIT | RLWPNKYVDV   | IVTGMSQYIPTLDYYS.NG.    |
| AtGH3-6         | PDPKLADFVESEC  | C.RKTS       | WQGIIT | RLWPNKYVDV   | IVTGMSQYIPTLDYYS.NG.    |
| AtGH3-7         | PHPEAADTIEQIC  | C.NQKC       | WKGII  | TRLWPKAKYIET | IVTGSMVQYVPTLNYY.S.NNM  |
| AtGH3-8         | PNPELADLIEQEC  | C.NNKS       | WEGIV  | RLWPKAKFIEC  | IATGQMAQHPTLEFFS.NK.    |
| AtGH3-9         | PNPELASLIEEIC  | C.GRSS       | WKGIL  | QLWPKAKFIEA  | VVTGMSAQYIPALEFFSQQK.   |
| AtGH3-10        | PNPSLASHIEEIC  | C.LELETNLGWF | GLTS   | KLWPNAKFIS   | IMTGSMLPYLNKLRHYA.GG.   |
| AtGH3-11        | PNPELAETIRTKC  | MSLSN        | WYGLIP | ALFPNAKYVYG  | IMTGSMEPYVVKLRHYA.GD.   |
| AtGH3-12        | PNPELADLIEEIC  | C.NQNS       | WKGIV  | RLWPNKYIET   | VVTGSMGQYVPMNYYC.ND.    |
| AtGH3-13        | PNPDLASLIEQEC  | C.SKTS       | WEAIV  | KRLWPKAKCIEA | VVTGMSAQYIPILEFFY.GG.   |
| AtGH3-14        | PNPELASLIEQEC  | C.SQTS       | WEAIV  | KRLWPKAKCIEA | IVTGMSAQYNPILLEFFS.GG.  |
| AtGH3-15        | PNPELASLIEQEC  | C.SKTS       | WEAIV  | KRLWPKAKCIEA | IITGTMAQYIPILLEFFS.GG.  |
| AtGH3-16        | PDPLANLIEQEC   | C.SKTS       | WEAIV  | SRIWPKAKCIEA | AVITGTMAQYIPILLEFFY.GG. |
| AtGH3-17        | PNQELADEIESEC  | C.AEKS       | WEGIL  | RRLWPKAKYVEV | IVTGMSAQYIPTLEFFS.GG.   |
| AtGH3-18        | PDQILADVIEQEC  | C.SHKS       | WEGII  | TRLWPKAKYIDC | IITGQMSQYIPMLEFFS.NK.   |
| AtGH3-19        | PDPELADVIEQEC  | C.SHKS       | WEGII  | TRLWPKAKFIEC | IVTGQMAQYIPTLDFFS.NK.   |
| BraX.GH3-1.a    | PDQHLAEFIRRE   | C.QTEN       | WEGII  | TRIWPNTKYLDV | IVTGAMAQYIPTLEYYS.GG.   |
| BraX.GH3-2.a    | PDQELAEFLVEVC  | C.SQDN       | WEGIV  | TKIWPNTKYLDV | IVTGAMAQYIPTLEYYS.GG.   |
| BraA09.GH3-3.a  | PDQELADYIASVC  | C.HDSN       | WEGVIT | TKIWPNTKYLDV | IVTGAMAQYIPMLEYYS.GG.   |
| BraA01.GH3-5.a  | QSPKLAEFVESEC  | C.KKKS       | WQGIIT | RLWPNKYVDV   | IVTGMSQYIPTLDYYS.NG.    |
| BraA03.GH3-5.b  | PSPKLADFVEFEC  | C.KKKS       | WQGIIT | RLWPNKYVDV   | IVTGMSQYIPTLDYYS.NG.    |
| BraA02.GH3-6.a  | PDPKLADFVESEC  | C.MKNS       | WQGIIT | RLWPNKYVDV   | IVTGMSQYIPTLDYYS.NG.    |
| BraA03.GH3-6.b  | PDPKLADFVESEC  | C.RKTS       | WQGIIT | RLWPNKYVDV   | IVTGMSQYIPTLDYYS.NG.    |
| BraA06.GH3-7.a  | QPRHKLSDIEESIC | C.SQKS       | WKGIM  | KLWPKQLCIEA  | IATGMSAQYVPTLKHY.S.GD.  |
| BraA08.GH3-7.b  | PHPEVANTVEKIC  | C.NEKC       | WKGIL  | KRLWPKTYIET  | IVTGMSAQYVPTLNYYC.NDM   |
| BraA02.GH3-8.a  | PNPELADLIEQEC  | C.NQKS       | WEGII  | RLWPKTKFIES  | IATGQMAQHPTLKFFS.NN.    |
| BraA03.GH3-8.b  | PNPELADLIEQEC  | C.NQKS       | WEGII  | RLWPKTKFIES  | IATGQMAQHPTLEFFS.NK.    |
| BraA03.GH3-8.c  | PNPQLADLIEEDIC | C.NQKS       | WKGII  | QLWPKTKYIEC  | IVTGQMAQHVPILLEFFV.ND.  |
| BraA03.GH3-8.d  | PNPQLAVTIEEDIC | C.NQKS       | WKGII  | QLWPKTKFIEC  | IVTGQMAQHVPILLEFFY.GD.  |
| BraA06.GH3-8.e  | PNPELADLIEQEC  | C.GQKS       | WQGIIV | RLWPKAKCIDA  | IITGMSAQYIPALEFFSNNE.   |
| BraA06.GH3-8.f  | PNPELADLIEQEC  | C.GKKS       | WQGIIV | LLWPKAKCIEA  | IVTGMSAQYIPTLEFFYTNN.   |
| BraA09.GH3-8.g  | GNSELADKIEECC  | C.KKKS       | WKGII  | RLWPNVKFIQS  | IVTGQMSQYIPMLEFFS.NK.   |
| BraA09.GH3-8.h  | PNPELADLIEQEC  | C.GQES       | WQGIIV | RLWPKTKCIVET | IVTGMAQYIPALEFFS.DK.    |
| BraA10.GH3-8.i  | GNSELADRIEEDC  | C.NTKS       | WEGII  | TRLWPKVKFIQS | IVTGQMSQYIPMLEFFS.NN.   |
| BraA09.GH3-10.a | PNPSLASRIEEDC  | C.TELESNVG   | WGLIP  | KLWPNAKYVSS  | IMTGSMLPYLTCLRHYA.GG.   |
| BraA03.GH3-11.a | PNPELAETIRTKC  | MSLSN        | WYGLIP | ALFPNAKYVYG  | IMTGSMEPYVVKLRHYA.GE.   |
| BraA04.GH3-11.b | PNPELADMIRTKC  | MSLSN        | WYGLIP | ALFPNAKYVYG  | IMTGSMEPYVVKLRHYA.GE.   |
| BraA05.GH3-11.c | PNPELEDITISDKC | MSLSN        | WYGLIP | ALFPNAKYVYG  | IMTGSMEPYVVKLRHYA.GD.   |
| BraA02.GH3-12.a | PRPDLADTIEETIC | C.NQSS       | WKGIV  | TRLWPNKYIET  | VVTGSMGQYVPTMNYC.ND.    |
| BraA03.GH3-12.b | PRPDLADTIEETIC | C.NKNS       | WEGIV  | KRLWPNKYIET  | VVTGSMGQYVPTLNYYC.SD.   |
| BraA06.GH3-12.c | QPRPKLSDEIENIC | C.SLKS       | WKGIM  | KLWPKTMYIEA  | IVTGMSAQYVPTLNHYC.DD.   |
| BraA10.GH3-12.d | PRPDLADTIEETIC | C.NQSS       | WKGIV  | TRLWPNKYIET  | VVTGSMGQYVPTLNYYC.SD.   |
| BraA10.GH3-14.a | PNPELASLIEKEC  | C.SKTS       | WEAIV  | RRLWPNAKCIEA | VVTGMSQYIPMLEFFY.GG.    |
| BraA03.GH3-15.a | PNPELASLIEKEC  | C.GKTS       | WEAIV  | RRLWPNAKCIEA | VVTGMSQYIPMLEFFY.CG.    |
| BraA07.GH3-15.b | PNPELASLIEQEC  | C.SKTS       | WEAIV  | RRLWPNAKCIEA | VVTGMSAQYIPMLEFFY.CG.   |
| BraA02.GH3-16.a | PNPDLASLIEKEC  | C.SKTS       | WEAIV  | KRLWPKAKCIEA | VVTGSMVQYIPILLEFFY.GG.  |
| BraA07.GH3-17.a | PNQELADEIESEC  | C.AEKS       | WEGIL  | RRLWPKAKYVEV | IVTGMSAQYIPTLEFFS.GG.   |
| BraA09.GH3-17.b | PNQELADEIESEC  | C.AEKS       | WEGIL  | RRLWPKAKYVEV | IVTGMSAQYIPTLEFFS.GG.   |
| BraAX.GH3-17.c  | PNQELADEIEALF  | C.NAKS       | REGIL  | KRLWPKTYIEV  | IVTGMSAQYIPTLEFFS.GG.   |
| BraA04.GH3-19.a | PNPELADLIEQEC  | C.QQTS       | WEGII  | RLWPNKFIQS   | VVTGQMSQYIPMLEFFS.SK.   |
| BraA06.GH3-19.b | PNPELADLIEQEC  | C.GQTS       | WQGIIV | TRLWPKAKCIEA | IITGMSAQYIPMLEFFS.NK.   |
| BraA09.GH3-19.c | PNPELADLIEQEC  | C.GQES       | WQGIIV | KRLWPKTKCIEA | IVTGMSQYIPALDYY.S.NK.   |
| BraA09.GH3-19.d | PNPELADLIEQEC  | C.SQKS       | WQGIIT | TRLWPKTYIET  | IVTGMSQYIPALDYY.S.NE.   |
| BraAX.GH3-19.e  | PNPELADLIEQEC  | C.SHKS       | WEGIV  | TRLWPKAKRIEC | VLTGQMAQYIPTLDFFY.NK.   |
| BolC09.GH3-1.a  | PDQHLAEFIRRE   | C.QTEN       | WEGII  | TRIWPNTKYLDV | IVTGAMAQYIPTLEYYS.GG.   |
| BolC01.GH3-2.a  | PDQELAEFLVEVC  | C.SQDN       | WEGIV  | TKIWPNTKYLDV | IVTGAMAQYIPTLEYYS.GG.   |
| BolC08.GH3-3.a  | PDQELADYITISVC | C.HDSN       | WEGVIT | TKIWPNTKYLDV | IVTGAMAQYIPMLEYYS.GG.   |
| BolC01.GH3-5.a  | PSPKLAEFVESEC  | C.KKKS       | WQGIIT | RLWPNKYVDV   | IVTGMSQYIPTLDYYS.NG.    |
| BolC07.GH3-5.b  | PSPKLADFVESEC  | C.KKKS       | WQGIIT | RLWPNKYVDV   | IVTGMSQYIPTLDYYS.NG.    |
| BolC02.GH3-6.a  | PDPKLADFVESEC  | C.KKNS       | WQGIIT | RLWPNKYVDV   | IVTGMSQYIPTLDYYS.NG.    |
| BolC03.GH3-6.b  | PDPKLADFVESEC  | C.RKTS       | WQGIIT | RLWPNKYVDV   | IVTGMSQYIPTLDYYS.NG.    |
| BolC06.GH3-7.a  | QPRPNLSDEIESIC | C.SQKS       | WKGIM  | KLWPKQTYIEA  | IVTGSMVQYIPMLEHYC.SD.   |
| BolC01.GH3-8.a  | PNPQLADQIODIC  | C.SQKS       | WKGII  | QLWPNKFEV    | VITGQMAQYVPALEFFV.DDQ   |
| BolC03.GH3-8.b  | PNPELADLIEQEC  | C.DQKS       | WEGII  | QLWPNKTFM    | IVTGQMAQHPTLEFFS.NK.    |
| BolC07.GH3-8.c  | PNPQLADLIEEDIC | C.NQKS       | WKGII  | QLWPKTKYIEC  | IVTGQMAQHVPILLEFFV.ND.  |
| BolC08.GH3-8.d  | PNPELADLIEQEC  | C.TGQES      | WQGIIT | TRLWPKTKCIEA | IVTGTLAQYIPTVLEFFS.NK.  |
| BolC09.GH3-8.e  | GNSELADRIEKEC  | C.NTKS       | WEGII  | TRLWPKVKFIQS | IVTGQMSQYIPMLEFFS.NN.   |
| BolC09.GH3-10.a | PNPSLASRIEDVC  | C.AELESNVG   | WGLIP  | KLWPNAKYVSS  | IMTGSMLTYLTCLRHYA.GG.   |
| BolC03.GH3-11.a | PNPELAETIRTKC  | MSLSN        | WYGLIP | ALFPNAKYVYG  | IMTGSMEPYVVKLRHYA.GE.   |
| BolC04.GH3-11.b | PNPELAETIRTKC  | MSLSN        | WYGLIP | ALFPNAKYVYG  | IMTGSMEPYVVKLRHYA.GE.   |
| BolCX.GH3-11.c  | PNPELAETIRTKC  | MSLSN        | WYGLIP | ALFPNAKYVYG  | IMTGSMEPYVVKLRHYA.GD.   |
| BolC03.GH3-12.a | PRPDLADTIEETIC | C.NKNS       | WEGIV  | KRLWPNKYIET  | VVTGSMGQYVPTLNYYC.SD.   |
| BolC09.GH3-12.b | PRPDLADTIEETIC | C.NQSS       | WKGIV  | TRLWPNKYIET  | VVTGSMGQYVPTLNYYC.SD.   |
| BolC09.GH3-14.a | PNPELASLIEQEC  | C.SKKS       | WEAIV  | RRLWPNAKCIEA | VVTGMSQYIPMLEFFY.CG.    |
| BolC03.GH3-15.a | PNPELASLIEQEC  | C.GKKS       | WEAIV  | RRLWPNAKCIEA | VVTGMSAQYIPMLEFFY.CG.   |
| BolCX.GH3-16.a  | PNPDLASLIEKEC  | C.SKIS       | WEAIV  | KRLWPKAKCIEA | VVTGSMVQYIPMLEFFY.GG.   |
| BolC07.GH3-17.a | PNQELADEIESEC  | C.AEKS       | WEGIL  | RRLWPKAKYVEV | IVTGMSAQYIPTLEFFS.GG.   |
| BolC08.GH3-17.b | PNQELADEIEALF  | C.NAKS       | REGIL  | KRVWPKTYIEV  | IVTGMSAQYIPTLEFFS.GG.   |
| BolC08.GH3-19.a | PNPELADLIEQEC  | C.GQES       | WQGIIT | TRLWPKTKCIEA | IVTGMSQYIPALDYY.S.NK.   |
| BnaA09R.GH3-1.a | PDQHLAEFIRRE   | C.QTEN       | WEGII  | TRIWPNTKYLDV | IVTGAMAQYIPTLEYYS.GG.   |
| BnaCX.GH3-1.a   | PDQHLAEFIRRE   | C.QTEN       | WEGII  | TRIWPNTKYLDV | IVTGAMAQYIPTLEYYS.GG.   |
| BnaA01.GH3-2.a  | PDQELAEFLVEVC  | C.SQDN       | WEGIV  | TKIWPNTKYLDV | IVTGAMAQYIPTLEYYS.GG.   |
| BnaC01.GH3-2.a  | PDQELAEFLVEVC  | C.SQDN       | WEGIV  | TKIWPNTKYLDV | IVTGAMAQYIPTLEYYS.GG.   |
| BnaA09.GH3-3.a  | PDQELADYITISVC | C.HDSN       | WEGVIT | TKIWPNTKYLDV | IVTGAMAQYIPMLEYYS.GG.   |
| BnaC08.GH3-3.a  | PDQELADYITISVC | C.HDSN       | WEGVIT | TKIWPNTKYLDV | IVTGAMAQYIPMLEYYS.GG.   |
| BnaA01.GH3-5.a  | QSPKLAEFVESEC  | C.KKKS       | WQGIIT | RLWPNKYVDV   | IVTGMSQYIPTLDYYS.NG.    |
| BnaA03.GH3-5.b  | PSPKLAEFVESEC  | C.KKKS       | WQGIIT | RLWPNKYVDV   | IVTGMSQYIPTLDYYS.NG.    |
| BnaC01.GH3-5.a  | PSPKLAEFVESEC  | C.KKKS       | WQGIIT | RLWPNKYVDV   | IVTGMSQYIPTLDYYS.NG.    |
| BnaC07.GH3-5.b  | PSPKLADFVESEC  | C.QKKS       | WQGIIT | RLWPNKYVDV   | IVTGMSQYIPTLDYYS.NG.    |
| BnaA03.GH3-6.a  | PDPKLADFVESEC  | C.RKTS       | WQGIIT | RLWPNKYVDV   | IVTGMSQYIPTLDYYS.NG.    |
| BnaAX.GH3-6.b   | PDPKLADFVESEC  | C.KKNS       | WQGIIT | RLWPNKYVDV   | IVTGMSQYIPTLDYYS.NG.    |
| BnaC03.GH3-6.a  | PDPKLADFVESEC  | C.RKTS       | WQGIIT | RLWPNKYVDV   | IVTGMSQYIPTLDYYS.NG.    |
| BnaCX.GH3-6.b   | PDPKLADFVESEC  | C.KKNS       | WQGIIT | RLWPNKYVDV   | IVTGMSQYIPTLDYYS.NG.    |
| BnaA06.GH3-7.a  | QPRHKLSDIEESIC | C.SQKS       | WKGIM  | KLWPKQLCIEA  | IATGMSAQYVPTLKHYC.GD.   |
| BnaA08.GH3-7.b  | PHPEVANTVEKIC  | C.NEKC       | WKGIL  | KRLWPKTYIET  | IVTGMSAQYVPTLNYYC.NDM   |
| BnaC06.GH3-7.a  | QPRPNLSDEIESIC | C.SQKS       | WKGIM  | KLWPKQTYIEA  | IVTGSMVQYIPMLEHYC.SD.   |
| BnaA03.GH3-8.a  | PNPELADLIEQEC  | C.NQKS       | WEGII  | RLWPKTKFIES  | IATGMSAQYIPTLEFFS.NK.   |
| BnaA03.GH3-8.b  | PNPQLADLIEEDIC | C.NQKS       | WKGII  | QLWPKTKYIEC  | IVTGQMAQHVPILLEFFV.ND.  |
| BnaA03.GH3-8.c  | PNPQLAVTIEEDIC | C.NQKS       | WKGII  | QLWPKTKFIEC  | IVTGQMAQHVPILLEFFY.GD.  |
| BnaA06.GH3-8.d  | PNPELADLIEQEC  | C.GEKS       | WQGIIV | RLWPKAKCIDA  | IITGMSAQYIPALEFFSNNE.   |

BnaA06.GH3-8.e .PNPELADLIEENV.C.GKK.S...WQGI.VS.LLWP.KAKCIEA.IFTGSMA.QYIP.TLEFY.TNNE.  
 BnaA09.GH3-8.f .PNPELADLIEENC.C.GQES...WQGI.VS.RLWP.KTKCIVET.IVTGIMA.QYIP.ALEFY.S.DK.  
 BnaA09.GH3-8.g .PNPELADLIEENC.C.GQES...WQGI.S.RLWP.KTKCIEA.IVTGTMA.QYIP.ALEFY.S.NK.  
 BnaAX.GH3-8.h .PNPELADLIEENC.C.NQKS...WEG.IIP.RLWP.KTKFIES.IATGQMA.QHIP.TLEFY.S.NN.  
 BnaAX.GH3-8.i .PNPELADLIEKE.C.TGOES...WQGI.IT.RLWP.KTKCIE.T.IVTGTLA.QYIP.VLEFY.S.NK.  
 BnaC01.GH3-8.a .PNPQLADQIQD.C.SQKS...WKGI.IP.QLWP.NTKFVEG.VITGQMA.QYIP.ALEFY.V.DDQ  
 BnaC02.GH3-8.b .PNPELADLIEENC.C.NQKS...WEG.IIP.RLWP.KTKFIES.IATGQMA.QHIP.TLEFY.S.NN.  
 BnaC02.GH3-8.c .PNPELADLIEENC.C.NQKS...WEG.IIP.RLWP.KTKFIES.IATGQMA.QHIP.TLEFY.S.NN.  
 BnaC02.GH3-8.d .PNPELADLIEENC.C.NQKS...WEG.IIP.RLWP.KTKFIES.IATGQMA.QHIP.TLEFY.S.NN.  
 BnaC07.GH3-8.e .PNPQLADLIE.DI.C.NQKS...WKGI.IP.QLWP.KTKYIEC.IVTGQMA.QHVP.LLEFY.V.ND.  
 BnaC09.GH3-8.f .GNSELADNIEEE.C.NKKS...WKGI.IP.RLWP.NVKFIO.S.IVTGQNS.QYIP.MLEFY.S.NK.  
 BnaCX.GH3-8.g .PNPELADLIEENC.C.RQES...WQ.....ALEFY.T.NK.  
 BnaA05.GH3-9.a .PNPDLADEIEEI.C.GRPS...WKGI.LC.QLWP.QAKFIEA.VVTGSMA.QYIP.ALEFF.SQ GK.  
 BnaC04.GH3-9.a .PNPDLADEVEEI.C.GRPS...WKGI.LC.QLWP.QAKFIEA.VVTGSMA.QYIP.ALEFF.SQ GK.  
 BnaA03.GH3-10.a .PNP.SLASRIEEM.CMELES.NLGF.GLIP.KLWP.TAKYVS.IMTGSML.SYLL.KKLRHYA.GG.  
 BnaA09.GH3-10.b .PNP.SLASRIE.EV.CTELES.NMGWL.GLIP.KLWP.NAKYVS.IMTGSML.PYLT.KLRRHYA.GG.  
 BnaC09.GH3-10.a .PNP.SLASRIE.DV.CAELES.NVGF.GLIP.KLWP.NAKYVS.IMTGSML.TYLT.KLRRHYA.GG.  
 BnaA03.GH3-11.a .PNPELAE.TIRNK.CMSLSN...WYGLIP.ALFP.NAKYVYG.IMTGSME.PYVK.KLRRHYA.GE.  
 BnaA04R.GH3-11.b .PNPELAD.TERTK.CLSLSN...WYGLIP.ALFP.NAKYVYG.IMTGSME.PYVK.KLRRHYA.GE.  
 BnaA05.GH3-11.c .PNPELAE.TIRDK.CLSLSN...WYGLIP.ALFP.NAKYVYG.IMTGSME.PYVK.KLRRHYA.GD.  
 BnaC04.GH3-11.a .PNPELAE.TIRAK.CLSLSN...WYGLIP.ALFP.NAKYVYG.IMTGSME.PYVK.KLRRHYA.GE.  
 BnaCX.GH3-11.b .PNPELAE.TIRTK.CMSLSN...WYGLIP.ALFP.NAKYVYG.IMTGSME.PYVK.KLRRHYA.GE.  
 BnaA02.GH3-12.a .PRPDLAD.TIETI.C.NQSS...WKGI.VT.RLWP.NTKYIET.VVTGSMG.QYVP.TMNYC.ND.  
 BnaA03.GH3-12.b .PRPDLAD.TIETI.C.NKNS...WEG.IV.KRLWP.NTKYIET.VVTGSMG.QYVP.TLNYYC.SD.  
 BnaA06.GH3-12.c .PRPKLSDEIENI.C.SLKS...WKGI.MKKLWP.QTMYIEA.IVTGSMA.QYVP.TLNHYC.DD.  
 BnaA10.GH3-12.d .PRPDLAD.TIETI.C.NQSS...WKGI.VT.RIWP.NTKYIET.VVTGSMG.QYVP.TLNYYC.SD.  
 BnaC02.GH3-12.a .PRPDLAD.TIETI.C.NQSS...WKGI.VT.RLWP.NTKYIET.VVTGSMG.QYVP.TMNYC.DD.  
 BnaC03.GH3-12.b .PRLDLAD.TIETI.C.NKNS...WEG.IV.KRLWP.NTKYIET.VVTGSMG.QYVP.TLNYYC.SD.  
 BnaC09.GH3-12.c .PRPDLAD.TIETI.C.NQSS...WKGI.VT.RIWP.NTKYIET.VVTGSMG.QYVP.TLNYYC.SD.  
 BnaA10.GH3-14.a .PNPELAS.IIEKE.C.SKTS...WEA.IV.RRLWP.NAKCIEA.VVTGSMS.QYIP.MLEFY.GG.  
 BnaC09.GH3-14.a .PNPELAS.IIEQEC.C.SKKS...WEA.IV.RRLWP.NAKCIEA.VVTGSMS.QYIP.MIEFY.GG.  
 BnaA03.GH3-15.a .PNPELAS.LIEQEC.C.GKTS...WEA.IV.RRLWP.NAKCIEA.VVTGSMA.QYIP.MMDFYC.GG.  
 BnaC03.GH3-15.a .PNPELAS.LIEQEC.C.GKKS...WEA.IV.RRLWP.NAKCIEA.VVTGSMA.QYIP.MMDFYC.GG.  
 BnaAX.GH3-16.a .PNPDLAS.LIEKE.C.SKTS...WEG.IV.KRLWP.KAKCIEA.VVTGSMA.QYIP.LLEFY.GG.  
 BnaC02.GH3-16.a .PNPDLAS.LIEKE.C.SKTS...WEG.IV.KRLWP.KAKCIEA.VVTGSMA.QYIP.LLEFY.GG.  
 BnaA07.GH3-17.a .PNOELADEIESE.C.AEKS...WEG.I.LRRLWP.KAKYVEV.IVTGSMA.QYIP.TLEFY.S.GG.  
 BnaA08.GH3-17.b .PNOELADEIEALF.NAKS...REGIL.KRIWP.KTKYIEV.IVTGSMA.QYIP.TLEFY.S.GG.  
 BnaA09.GH3-17.c .PNOELADEIESE.C.AEKS...WEG.I.LRRLWP.KAKYVEV.IVTGSMA.QYIP.TLEFY.S.GG.  
 BnaC08.GH3-17.a .PNOELADEIESE.C.AEKS...WEG.I.LRRLWP.KAKYVEV.IVTGSMA.QYIP.TLEFY.S.GG.  
 BnaCX.GH3-17.b .PNOELADEIESE.C.AEKS...WEG.I.LRRLWP.KAKYVEV.IVTGSMA.QYIP.TLEFY.S.GG.  
 BnaCX.GH3-17.c .PNOELADEIESE.C.AEKS...WEG.I.LRRLWP.KAKYVEV.IVTGSMA.QYIP.TLEFY.S.GG.  
 BnaA05GH3-18.a .PNPELADLIEQEC.C.SHKS...WEG.IV.TRLWP.KAKRIEC.VLTGQMA.QYIP.ILDFYC.NK.  
 BnaCX.GH3-18.a .PNAELADLIEHE.C.GGQKS...WQGI.IT.RLWP.KTKYIET.IVTGTMS.QHIP.ALDYY.S.NK.  
 BnaA06.GH3-19.a .PNPELADLIEENC.C.GQTS...WQGI.VT.RLWP.KTKCIEA.IITGSMA.QHIS.ALEFY.S.NK.  
 BnaA09.GH3-19.b .PNAELADLIEKE.C.GQES...WQGI.LRRLWP.KTKCIE.T.IVTGTMS.QHIP.ALDYY.S.NK.  
 consensus>70 .pnpelad.lie...s...w.gii..llwp..kyie.ivtg.m.qyip.lef%....



|                 | 330    | 340 | 350    | 360     | 370  |                |         |                          |                         |         |       |              |
|-----------------|--------|-----|--------|---------|------|----------------|---------|--------------------------|-------------------------|---------|-------|--------------|
| AtGH3-1         | LPMAC  | TM  | YASSE  | CYFGLN  | NPM  | KPSEVSYTIMPNMA | YFEFLPI | .....                    |                         |         |       |              |
| AtGH3-2         | LPMAC  | TM  | YASSE  | SYFGIN  | LKPM | KPSEVSYTIMPNMA | YFEFLPH | .....NHDGD.....          |                         |         |       |              |
| AtGH3-3         | LPMAC  | TM  | YASSE  | SYFGIN  | LKPM | KPSEVSYTIMPNMA | YFEFLPH | .....HEVPT.....          |                         |         |       |              |
| AtGH3-4         | LPMAS  | MI  | YASSE  | SYFGIN  | LNPM | KPSEVSYTIMPNMA | YFEFLPH | .....NHDGD.....          |                         |         |       |              |
| AtGH3-5         | LPLVCT | TM  | YASSE  | CYFGVNL | RLPL | KPSEVSYTLIP    | SMA     | YFEFLPV.....HRNNGVTNSINL |                         |         |       |              |
| AtGH3-6         | LPLVCT | TM  | YASSE  | CYFGVNL | RLPL | KPSEVSYTLIP    | SMA     | YFEFLPV.....HRNNGVTNSINL |                         |         |       |              |
| AtGH3-7         | LPLIST | TI  | YASSE  | QFGLN   | LNPM | KPSEVSYTFM     | NVS     | YFEFLPV.....HRNSGVTSSISL |                         |         |       |              |
| AtGH3-8         | LPSIS  | SS  | YVSSE  | TMFGIN  | MSPL | KPENVSYTF      | LNLS    | YFEFLLV.....             |                         |         |       |              |
| AtGH3-9         | LPLVCP | PM  | YASSE  | TYFGVN  | VEPL | KS             | SDVFTLL | LNMC                     | YFEFLPLGKNGTLSFDLDDDEQV |         |       |              |
| AtGH3-10        | LPLVSA | AD  | YGSTE  | SWIGVN  | VDPL | PPEDVSFAV      | IP      | TF                       | S                       | YFEFLPL | ..... |              |
| AtGH3-11        | LPLVSH | HD  | YGSGE  | GWIAAN  | VT   | PR             | LS      | PEATF                    | AV                      | IP      | NLG   | YFEFLPV..... |
| AtGH3-12        | LPLVST | TT  | YGSEET | TFGIN   | VDPL | CKP            | EDVSYTF | MP                       | NMS                     | YFEFLIP | ..... |              |
| AtGH3-13        | LPLIS  | SW  | YGSGE  | CFMGVN  | VNPL | CKP            | SDVSYTI | IP                       | SMA                     | YFEFLPV | ..... |              |
| AtGH3-14        | LPVIS  | TF  | YGSGE  | CFMGVN  | VNPL | CKP            | SDVSYTI | IP                       | SMA                     | YFEFLPV | ..... |              |
| AtGH3-15        | LPLIS  | SS  | YVSSE  | TMFGIN  | MSPL | KPENVSYTF      | LNLS    | YFEFLLV                  | .....                   |         |       |              |
| AtGH3-16        | LPLVSW | SW  | YGSGE  | CFMGVN  | VNPL | CKP            | SDVSYTI | IP                       | SMA                     | YFEFLPV | ..... |              |
| AtGH3-17        | LPLVST | TT  | YGSEET | TFGIN   | VDPL | CKP            | EDVSYTF | MP                       | NMS                     | YFEFLIP | ..... |              |
| AtGH3-18        | LPLVTS | TT  | YGSEET | TFGIN   | VDPL | CKP            | EDVSYTF | MP                       | NMS                     | YFEFLIP | ..... |              |
| AtGH3-19        | LPLVTS | TT  | YGSEET | TFGIN   | VDPL | CKP            | EDVSYTF | MP                       | NMS                     | YFEFLIP | ..... |              |
| BraX.GH3-1.a    | LPMAC  | TM  | YASSE  | CYFGLN  | NPM  | KPSEVSYTIMPNMA | YFEFLPI | .....                    |                         |         |       |              |
| BraX.GH3-2.a    | LPMAC  | TM  | YASSE  | CYFGLN  | NPM  | KPSEVSYTIMPNMA | YFEFLPI | .....D.....              |                         |         |       |              |
| BraA09.GH3-3.a  | LPMAC  | TM  | YASSE  | CYFGLN  | NPM  | KPSEVSYTIMPNMA | YFEFLPI | .....EDATE.....          |                         |         |       |              |
| BraA01.GH3-5.a  | LPLVCT | TM  | YASSE  | CYFGVNL | RLPL | KPSEVSYTLIP    | TMA     | YFEFLPV                  | .....HRNTGVTNSINL       |         |       |              |
| BraA03.GH3-5.b  | LPLVCT | TM  | YASSE  | CYFGVNL | RLPL | KPSEVSYTLIP    | TMA     | YFEFLPV                  | .....HRNTGVTNSINL       |         |       |              |
| BraA02.GH3-6.a  | LPLVCT | TM  | YASSE  | CYFGVNL | RLPL | KPSEVSYTLIP    | TMA     | YFEFLPV                  | .....HRNNGVTSSISL       |         |       |              |
| BraA03.GH3-6.b  | LPLVCT | TM  | YASSE  | CYFGVNL | RLPL | KPSEVSYTLIP    | TMA     | YFEFLPV                  | .....HRNNGVTSSISL       |         |       |              |
| BraA06.GH3-7.a  | VPLVST | TI  | YASSE  | SMFGIN  | TDPL | CP             | EDVSYTF | MP                       | NIS                     | YFEFLPI | ..... |              |
| BraA08.GH3-7.b  | LPLVST | TT  | YGSEET | TFGIN   | VDPL | CKP            | EDVSYTF | MP                       | NIS                     | YFEFLPI | ..... |              |
| BraA02.GH3-8.a  | LPLIS  | SS  | YVSSE  | TMFGIN  | MSPL | KPENVSYTF      | LNLS    | YFEFLLV                  | .....                   |         |       |              |
| BraA03.GH3-8.b  | LPLIS  | SS  | YVSSE  | TMFGIN  | MSPL | KPENVSYTF      | LNLS    | YFEFLLV                  | .....                   |         |       |              |
| BraA03.GH3-8.c  | LPLVSN | PN  | YASSE  | AMFGVN  | VNPL | CKP            | SDVSYTF | LN                       | NMS                     | YFEFLIP | ..... |              |
| BraA03.GH3-8.d  | LPLVSN | PN  | YASSE  | AMFGVN  | VNPL | CKP            | SDVSYTF | LN                       | NMS                     | YFEFLIP | ..... |              |
| BraA03.GH3-8.e  | LPLVSN | PN  | YASSE  | AMFGVN  | VNPL | CKP            | SDVSYTF | LN                       | NMS                     | YFEFLIP | ..... |              |
| BraA06.GH3-8.f  | LSLVS  | LR  | YASSE  | AFGLN   | LEPL | KS             | SDVSYTF | LN                       | NMS                     | YFEFLIP | ..... |              |
| BraA09.GH3-8.g  | VHLFS  | PA  | YGSGE  | TFMGVN  | VNPL | CKP            | EDVSYTF | MP                       | NIS                     | YFEFLIP | ..... |              |
| BraA09.GH3-8.h  | LPLVST | TT  | YGSEET | TFGIN   | VDPL | CKP            | EDVSYTF | MP                       | NIS                     | YFEFLIP | ..... |              |
| BraA10.GH3-8.i  | VPLIST | TV  | YASSE  | TMFGIN  | MSPL | KPENVSYTF      | LNLS    | YFEFLLV                  | .....                   |         |       |              |
| BraA09.GH3-10.a | LPLVSA | AD  | YGSTE  | SWIGVN  | VDPL | PPEDVSFAV      | IP      | TF                       | S                       | YFEFLPL | ..... |              |
| BraA03.GH3-11.a | LPLVSH | HD  | YGSGE  | GWIAAN  | VT   | PR             | LS      | PEATF                    | AV                      | IP      | NLG   | YFEFLPV..... |
| BraA04.GH3-11.b | LPLVSH | HD  | YGSGE  | GWIAAN  | VT   | PR             | LS      | PEATF                    | AV                      | IP      | NLG   | YFEFLPV..... |
| BraA05.GH3-11.c | LPLVSH | HD  | YGSGE  | GWIAAN  | VT   | PR             | LS      | PEATF                    | AV                      | IP      | NLG   | YFEFLPV..... |
| BraA02.GH3-12.a | LPLVST | TT  | YGSEET | TFGIN   | VDPL | CKP            | EDVSYTF | MP                       | NMS                     | YFEFLIP | ..... |              |
| BraA03.GH3-12.b | LPLVST | TT  | YGSEET | TFGIN   | VDPL | CKP            | EDVSYTF | MP                       | NMS                     | YFEFLIP | ..... |              |
| BraA06.GH3-12.c | LPLVST | TT  | YGSEET | TFGIN   | VDPL | CKP            | EDVSYTF | MP                       | NMS                     | YFEFLIP | ..... |              |
| BraA10.GH3-12.d | LPLVST | TT  | YGSEET | TFGIN   | VDPL | CKP            | EDVSYTF | MP                       | NMS                     | YFEFLIP | ..... |              |
| BraA10.GH3-14.a | LPVIS  | LF  | YGSGE  | CLFGLN  | VNPL | CKP            | SDVSYTF | IP                       | SMA                     | YFEFLPV | ..... |              |
| BraA03.GH3-15.a | LPLIS  | SS  | YVSSE  | TMFGIN  | MSPL | KPENVSYTF      | LNLS    | YFEFLLV                  | .....                   |         |       |              |
| BraA07.GH3-15.b | LPLIST | TF  | YGSGE  | CSVGLN  | LDPL | CKP            | SDVSYTF | IP                       | SMA                     | YFEFLPV | ..... |              |
| BraA02.GH3-16.a | LPLVST | TT  | YGSEET | TFGIN   | VDPL | CKP            | EDVSYTF | MP                       | NMS                     | YFEFLIP | ..... |              |
| BraA07.GH3-17.a | LPLVST | TT  | YGSEET | TFGIN   | VDPL | CKP            | EDVSYTF | MP                       | NMS                     | YFEFLIP | ..... |              |
| BraA09.GH3-17.b | LPLVST | TT  | YGSEET | TFGIN   | VDPL | CKP            | EDVSYTF | MP                       | NMS                     | YFEFLIP | ..... |              |
| BraAX.GH3-17.c  | LPLVST | TT  | YGSEET | TFGIN   | VDPL | CKP            | EDVSYTF | MP                       | NMS                     | YFEFLIP | ..... |              |
| BraA04.GH3-19.a | LPLVSN | PN  | YASSE  | AMFGVN  | VNPL | CKP            | SDVSYTF | LN                       | NMS                     | YFEFLIP | ..... |              |
| BraA06.GH3-19.b | LPLVSN | PN  | YASSE  | AMFGVN  | VNPL | CKP            | SDVSYTF | LN                       | NMS                     | YFEFLIP | ..... |              |
| BraA09.GH3-19.c | LPLVSN | PN  | YASSE  | AMFGVN  | VNPL | CKP            | SDVSYTF | LN                       | NMS                     | YFEFLIP | ..... |              |
| BraA09.GH3-19.d | LPLVSN | PN  | YASSE  | AMFGVN  | VNPL | CKP            | SDVSYTF | LN                       | NMS                     | YFEFLIP | ..... |              |
| BraAX.GH3-19.e  | LPLVST | TT  | YGSEET | TFGIN   | VDPL | CKP            | EDVSYTF | MP                       | NMS                     | YFEFLIP | ..... |              |
| BolC09.GH3-1.a  | LPMAC  | TM  | YASSE  | CYFGLN  | NPM  | KPSEVSYTIMPNMA | YFEFLPI | .....                    |                         |         |       |              |
| BolC01.GH3-2.a  | LPMAC  | TM  | YASSE  | CYFGLN  | NPM  | KPSEVSYTIMPNMA | YFEFLPI | .....E.....              |                         |         |       |              |
| BolC08.GH3-3.a  | LPMAC  | TM  | YASSE  | CYFGLN  | NPM  | KPSEVSYTIMPNMA | YFEFLPI | .....EDAP.....           |                         |         |       |              |
| BolC01.GH3-5.a  | LPLVCT | TM  | YASSE  | CYFGVNL | RLPL | KPSEVSYTLIP    | TMA     | YFEFLPV                  | .....HRNTGVTNSINL       |         |       |              |
| BolC07.GH3-5.b  | LPLVCT | TM  | YASSE  | CYFGVNL | RLPL | KPSEVSYTLIP    | TMA     | YFEFLPV                  | .....YRNTGVTNSINL       |         |       |              |
| BolC02.GH3-6.a  | LPLVCT | TM  | YASSE  | CYFGVNL | RLPL | KPSEVSYTLIP    | TMA     | YFEFLPV                  | .....HRNNGVTSSISL       |         |       |              |
| BolC03.GH3-6.b  | LPLVCT | TM  | YASSE  | CYFGVNL | RLPL | KPSEVSYTLIP    | TMA     | YFEFLPV                  | .....HRNNGVTSSISL       |         |       |              |
| BolC06.GH3-7.a  | LPVVS  | TI  | YASSE  | SIFGIN  | TYPL | CKP            | EDISYTF | MP                       | NIS                     | YFEFLIP | ..... |              |
| BolC01.GH3-8.a  | LPLVSP | PA  | YASSE  | SPFAVN  | MSPL | KPENVSYTF      | LNLS    | YFEFLLV                  | .....                   |         |       |              |
| BolC03.GH3-8.b  | LPLIS  | SS  | YVSSE  | TMFGIN  | MSPL | KPENVSYTF      | LNLS    | YFEFLLV                  | .....                   |         |       |              |
| BolC07.GH3-8.c  | LPLVSN | PN  | YASSE  | AMFGVN  | VNPL | CKP            | SDVSYTF | LN                       | NMS                     | YFEFLIP | ..... |              |
| BolC08.GH3-8.d  | LPLVSN | PN  | YASSE  | AMFGVN  | VNPL | CKP            | SDVSYTF | LN                       | NMS                     | YFEFLIP | ..... |              |
| BolC09.GH3-8.e  | VPLIST | TV  | YASSE  | TMFGIN  | MSPL | KPENVSYTF      | LNLS    | YFEFLLV                  | .....                   |         |       |              |
| BolC09.GH3-10.a | LPLVSA | AD  | YGSTE  | SWIGVN  | VDPL | PPEDVSFAV      | IP      | TF                       | S                       | YFEFLPL | ..... |              |
| BolC03.GH3-11.a | LPLVSH | HD  | YGSGE  | GWIAAN  | VT   | PR             | LS      | PEATF                    | AV                      | IP      | NLG   | YFEFLPV..... |
| BolC04.GH3-11.b | LPLVSH | HD  | YGSGE  | GWIAAN  | VT   | PR             | LS      | PEATF                    | AV                      | IP      | NLG   | YFEFLPV..... |
| BolCX.GH3-11.c  | LPLVSH | HD  | YGSGE  | GWIAAN  | VT   | PR             | LS      | PEATF                    | AV                      | IP      | NLG   | YFEFLPV..... |
| BolC03.GH3-12.a | LPLVST | TT  | YGSEET | TFGIN   | VDPL | CKP            | EDVSYTF | MP                       | NMS                     | YFEFLIP | ..... |              |
| BolC09.GH3-12.b | LPLVST | TT  | YGSEET | TFGIN   | VDPL | CKP            | EDVSYTF | MP                       | NMS                     | YFEFLIP | ..... |              |
| BolC09.GH3-14.a | LPVIS  | LF  | YGSGE  | CLFGLN  | VNPL | CKP            | SDVSYTF | IP                       | SMA                     | YFEFLPV | ..... |              |
| BolC03.GH3-15.a | LPLIS  | SS  | YVSSE  | TMFGIN  | MSPL | KPENVSYTF      | LNLS    | YFEFLLV                  | .....                   |         |       |              |
| BolCX.GH3-16.a  | LPLIST | TF  | YGSGE  | CSVGLN  | LDPL | CKP            | SDVSYTF | IP                       | SMA                     | YFEFLPV | ..... |              |
| BolC03.GH3-17.a | LPLVST | TT  | YGSEET | TFGIN   | VDPL | CKP            | EDVSYTF | MP                       | NMS                     | YFEFLIP | ..... |              |
| BolC08.GH3-17.b | LPLVST | TT  | YGSEET | TFGIN   | VDPL | CKP            | EDVSYTF | MP                       | NMS                     | YFEFLIP | ..... |              |
| BolC08.GH3-19.a | LPLVSN | PN  | YASSE  | AMFGVN  | VNPL | CKP            | SDVSYTF | LN                       | NMS                     | YFEFLIP | ..... |              |
| BnaA09R.GH3-1.a | LPMAC  | TM  | YASSE  | CYFGLN  | NPM  | KPSEVSYTIMPNMA | YFEFLPI | .....                    |                         |         |       |              |
| BnaCX.GH3-1.a   | LPMAC  | TM  | YASSE  | CYFGLN  | NPM  | KPSEVSYTIMPNMA | YFEFLPI | .....                    |                         |         |       |              |
| BnaA01.GH3-2.a  | LPMAC  | TM  | YASSE  | CYFGLN  | NPM  | KPSEVSYTIMPNMA | YFEFLPI | .....D.....              |                         |         |       |              |
| BnaC01.GH3-2.a  | LPMAC  | TM  | YASSE  | CYFGLN  | NPM  | KPSEVSYTIMPNMA | YFEFLPI | .....E.....              |                         |         |       |              |
| BnaA09.GH3-3.a  | LPMAC  | TM  | YASSE  | CYFGLN  | NPM  | KPSEVSYTIMPNMA | YFEFLPI | .....EDATE.....          |                         |         |       |              |
| BnaC08.GH3-3.a  | LPMAC  | TM  | YASSE  | CYFGLN  | NPM  | KPSEVSYTIMPNMA | YFEFLPI | .....EDAP.....           |                         |         |       |              |
| BnaA01.GH3-5.a  | LPLVCT | TM  | YASSE  | CYFGVNL | RLPL | KPSEVSYTLIP    | TMA     | YFEFLPV                  | .....HRNT.....          |         |       |              |
| BnaA03.GH3-5.b  | LPLVCT | TM  | YASSE  | CYFGVNL | RLPL | KPSEVSYTLIP    | TMA     | YFEFLPV                  | .....HRNTGVTNSINL       |         |       |              |
| BnaC01.GH3-5.a  | LPLVCT | TM  | YASSE  | CYFGVNL | RLPL | KPSEVSYTLIP    | TMA     | YFEFLPV                  | .....HRNTGVTNSINL       |         |       |              |
| BnaC07.GH3-5.b  | LPLVCT | TM  | YASSE  | CYFGVNL | RLPL | KPSEVSYTLIP    | TMA     | YFEFLPV                  | .....YRNTGVTNSINL       |         |       |              |
| BnaA03.GH3-6.a  | LPLVCT | TM  | YASSE  | CYFGVNL | RLPL | KPSEVSYTLIP    | TMA     | YFEFLPV                  | .....HRNSG.....         |         |       |              |
| BnaAX.GH3-6.b   | LPLVCT | TM  | YASSE  | CYFGVNL | RLPL | KPSEVSYTLIP    | TMA     | YFEFLPV                  | .....HRNNGVTSSISL       |         |       |              |
| BnaC03.GH3-6.a  | LPLVCT | TM  | YASSE  | CYFGVNL | RLPL | KPSEVSYTLIP    | TMA     | YFEFLPV                  | .....HRNNGVTSSISL       |         |       |              |
| BnaCX.GH3-6.b   | LPLVCT | TM  | YASSE  | CYFGVNL | RLPL | KPSEVSYTLIP    | TMA     | YFEFLPV                  | .....HRNNGVTSSISL       |         |       |              |
| BnaA06.GH3-7.a  | VPLVST | TI  | YASSE  | SMFGIN  | TDPL | CP             | EDVSYTF | MP                       | NIS                     | YFEFLPI | ..... |              |
| BnaA08.GH3-7.b  | LPLVST | TT  | YGSEET | TFGIN   | VDPL | CKP            | EDVSYTF | MP                       | NIS                     | YFEFLPI | ..... |              |
| BnaC06.GH3-7.a  | LPVVS  | TI  | YASSE  | SIFGIN  | TYPL | CKP            | EDISYTF | MP                       | NIS                     | YFEFLIP | ..... |              |
| BnaA03.GH3-8.a  | LPLIS  | SS  | YVSSE  | TMFGIN  | MSPL | KPENVSYTF      | LNLS    | YFEFLLV                  | .....                   |         |       |              |
| BnaA03.GH3-8.b  | LPLVSN | PN  | YASSE  | AMFGVN  | VNPL | CKP            | SDVSYTF | LN                       | NMS                     | YFEFLIP | ..... |              |
| BnaA03.GH3-8.c  | LPLVSN | PN  | YASSE  | AMFGVN  | VNPL | CKP            | SDVSYTF | LN                       | NMS                     | YFEFLIP | ..... |              |
| BnaA06.GH3-8.d  | LPLVSN | PN  | YASSE  | AMFGVN  | VNPL | CKP            | SDVSYTF | LN                       | NMS                     | YFEFLIP | ..... |              |

BnaA06.GH3-8.e LSLVSLR~~Y~~ASSEAF~~F~~G~~L~~N~~L~~EPLSK~~.~~.NVSYTF~~L~~PNMS~~Y~~FEFL~~D~~V.....  
 BnaA09.GH3-8.f LPIVLSI~~Y~~GSSETF~~F~~G~~L~~N~~V~~NPLCKP~~Q~~HVSYTF~~L~~PNMS~~Y~~FEFL~~H~~V.....  
 BnaA09.GH3-8.g LPLVLSRT~~Y~~ASSEAF~~F~~G~~L~~N~~V~~NPLSKP~~Q~~HVSYTF~~L~~PNMS~~Y~~FEFL~~D~~V.....  
 BnaAX.GH3-8.h LPLISS~~Y~~VSSETM~~F~~G~~I~~N~~M~~NPLCKP~~Q~~DVSYTF~~M~~PNFS~~Y~~FEFL~~L~~V.....  
 BnaAX.GH3-8.i LPLVSKN~~Y~~ASSETF~~F~~G~~L~~N~~L~~NPLSKP~~E~~HVSYTF~~L~~PNMA~~Y~~FEFL~~D~~V.....  
 BnaC01.GH3-8.a LPLVSPAY~~Y~~GSSESP~~F~~AV~~N~~MNPLCKP~~Q~~DISYTF~~I~~PNMS~~Y~~FEFL~~P~~I.....  
 BnaC02.GH3-8.b LPLISS~~Y~~VSSETM~~F~~G~~I~~N~~M~~NPLCKP~~Q~~DVSYTF~~M~~PNFS~~Y~~FEFL~~L~~V.....  
 BnaC02.GH3-8.c LPLISS~~Y~~VSSETM~~F~~G~~I~~N~~M~~NPLCKP~~Q~~DVSYTF~~M~~PNFS~~Y~~FEFL~~L~~V.....  
 BnaC02.GH3-8.d LPLISS~~Y~~VSSETM~~F~~G~~I~~N~~M~~NPLCKP~~Q~~DVSYTF~~M~~PNFS~~Y~~FEFL~~L~~V.....  
 BnaC07.GH3-8.e LPLVSPN~~Y~~ASSEAM~~F~~G~~V~~N~~L~~NPLCKP~~Q~~DVSYTF~~L~~PNMS~~Y~~FEFL~~P~~V.....  
 BnaC09.GH3-8.f VHLFSPAY~~Y~~GSSETM~~F~~G~~V~~N~~V~~NPLCKP~~E~~DVSYTF~~M~~PNIS~~Y~~FEFL~~L~~A.....  
 BnaCX.GH3-8.g LPLVSKS~~Y~~ASSEAF~~F~~G~~L~~N~~L~~EPLSK~~.~~.NVSYTF~~L~~PNMS~~Y~~FEFL~~D~~V.....  
 BnaA05.GH3-9.a IPLVCPMY~~Y~~ASSETY~~F~~G~~V~~N~~V~~MPLSKP~~S~~DVVFTLL~~L~~PNMC~~Y~~FEFL~~P~~L~~G~~KNGT~~L~~SFDVEDEEVV  
 BnaC04.GH3-9.a IPLVCPMY~~Y~~ASSETY~~F~~G~~V~~N~~V~~KPLSKP~~S~~DVVFTLL~~L~~PNMC~~Y~~FEFL~~P~~L~~G~~KNGT~~L~~SFDVEDEEVV  
 BnaA03.GH3-10.a LPLVSGN~~Y~~VSSESL~~I~~G~~V~~N~~V~~DPQL~~P~~PE~~D~~VSFAV~~I~~PTFS~~Y~~FEFL~~P~~L.....  
 BnaA09.GH3-10.b LPLVAD~~Y~~GSTESW~~I~~G~~V~~N~~V~~DPQL~~P~~PE~~D~~VSFAV~~I~~PTFS~~Y~~FEFL~~P~~L.....  
 BnaC09.GH3-10.a LPLVAD~~Y~~GSTESW~~I~~G~~V~~N~~V~~DPQL~~P~~PE~~D~~VSFAV~~I~~PTFS~~Y~~FEFL~~P~~L.....  
 BnaA03.GH3-11.a LPLVSHD~~Y~~GSSEGW~~I~~AAN~~V~~RPRL~~S~~PEEATFAV~~V~~PNLGY~~Y~~FEFL~~P~~L.....  
 BnaA04R.GH3-11.b LPLVSHD~~Y~~GSSEGW~~I~~AAN~~V~~TPRL~~S~~PEEATFAV~~V~~PNLGY~~Y~~FEFL~~P~~V.....  
 BnaA05.GH3-11.c LPLVSHD~~Y~~GSSEGW~~I~~AAN~~V~~TPRL~~S~~PEEATFAV~~V~~PNLGY~~Y~~FEFL~~P~~V.....  
 BnaC04.GH3-11.a LPLVSHD~~Y~~GSSEGW~~I~~AAN~~V~~TPRL~~S~~PEEATFAV~~V~~PNLGY~~Y~~FEFL~~P~~V.....  
 BnaCX.GH3-11.b LPLVSHD~~Y~~GSSEGW~~I~~AAN~~V~~RPRL~~S~~PEEATFAV~~V~~PNLGY~~Y~~FEFL~~P~~L.....  
 BnaA02.GH3-12.a LPLVSTT~~Y~~GSSETT~~F~~G~~I~~N~~V~~DP~~L~~CKP~~E~~DVSYAF~~M~~PNMS~~Y~~FEFL~~I~~M.....  
 BnaA03.GH3-12.b LPLVSTT~~Y~~GSSETT~~F~~G~~I~~N~~V~~DP~~L~~CKP~~E~~DVSYAF~~M~~PNMS~~Y~~FEFL~~I~~M.....  
 BnaA06.GH3-12.c LPLVSTT~~Y~~ASSESI~~F~~G~~I~~N~~I~~DP~~L~~CKP~~E~~DISYTL~~M~~PNIS~~Y~~FEFL~~P~~V.....  
 BnaA10.GH3-12.d LPLVSTT~~Y~~GSSETT~~F~~G~~I~~N~~V~~DP~~L~~CKP~~E~~DVSYAF~~M~~PNMS~~Y~~FEFL~~I~~M.....  
 BnaC02.GH3-12.a LPLVSTT~~Y~~GSSETT~~F~~G~~I~~N~~V~~DP~~L~~CKP~~E~~DVSYAF~~M~~PNMS~~Y~~FEFL~~I~~M.....  
 BnaC03.GH3-12.b LPLVSTT~~Y~~GSSETT~~F~~G~~I~~N~~V~~DP~~L~~CKP~~E~~DVSYAF~~M~~PNMS~~Y~~FEFL~~I~~M.....  
 BnaC09.GH3-12.c LPLVSTT~~Y~~GSSETT~~F~~G~~I~~N~~V~~DP~~L~~CKP~~E~~DVSYAF~~M~~PNMS~~Y~~FEFL~~I~~M.....  
 BnaA10.GH3-14.a LPVISLFY~~Y~~GSSECL~~F~~G~~L~~N~~V~~NPLCKP~~Q~~DVSYTT~~V~~PSMA~~Y~~FEFL~~E~~V.....  
 BnaC09.GH3-14.a LPVISLFY~~Y~~GSSECL~~F~~G~~L~~N~~I~~NPLSKP~~Q~~DVSYTT~~V~~PSMA~~Y~~FEFL~~E~~V.....  
 BnaA03.GH3-15.a LPLVLSF~~Y~~ASSECF~~L~~G~~L~~N~~L~~N~~T~~LRKP~~S~~DAAYTI~~I~~PSMA~~Y~~FEFL~~E~~V.....  
 BnaC03.GH3-15.a LPLISSF~~Y~~ASSECF~~L~~G~~L~~N~~L~~N~~T~~LRKP~~S~~DAAYTI~~I~~PSMA~~Y~~FEFL~~E~~V.....  
 BnaAX.GH3-16.a LPLISSW~~Y~~GASECF~~I~~G~~I~~N~~V~~DP~~L~~SKP~~Q~~DVSYTI~~V~~PSMA~~Y~~FEFL~~E~~V.....  
 BnaC02.GH3-16.a LPLISSW~~Y~~GASECF~~I~~G~~I~~N~~V~~DP~~L~~T~~T~~KP~~Q~~DVSYTI~~V~~PSMA~~Y~~FEFL~~E~~V.....  
 BnaA07.GH3-17.a LPLVSTM~~Y~~ASSECY~~F~~G~~I~~N~~L~~NPLCKP~~S~~DVSYTLL~~L~~PNMA~~Y~~FEFL~~P~~VDDKSHEEIH~~F~~ASHSNT  
 BnaA08.GH3-17.b LPLVSTM~~Y~~ASSECY~~F~~G~~L~~N~~I~~NPLCKP~~S~~DVSYTLL~~L~~PNMA~~Y~~FEFL~~P~~VDDKSHEET~~Q~~LESH...  
 BnaA09.GH3-17.c LPLVSTM~~Y~~ASSECY~~F~~G~~I~~N~~L~~NPLCKP~~S~~DVSYTLL~~L~~PNMA~~Y~~FEFL~~P~~VDDKSHEEIH~~F~~ASHSNT  
 BnaC08.GH3-17.a LPLVSTM~~Y~~ASSECY~~F~~G~~L~~N~~I~~NPLCKP~~S~~DVSYTLL~~L~~PNMA~~Y~~FEFL~~P~~VDDKSHEET~~Q~~LESH...  
 BnaCX.GH3-17.b LPLVSTM~~Y~~ASSECY~~F~~G~~I~~N~~L~~NPLCKP~~S~~DVSYTLL~~L~~PNMA~~Y~~FEFL~~P~~VDDKSHEEIH~~F~~ASHSNT  
 BnaCX.GH3-17.c LPLVSTM~~Y~~ASSECY~~F~~G~~I~~N~~L~~NPLCKP~~S~~DVSYTLL~~L~~PNMA~~Y~~FEFL~~P~~I.....HFASHSNT  
 BnaA05GH3-18.a LPLVSTV~~Y~~GSSESI~~F~~G~~F~~N~~V~~DP~~L~~CKP~~Q~~DVSYTF~~V~~NT~~S~~YFEFL~~P~~V.....  
 BnaCX.GH3-18.a LPLVSKV~~Y~~ASSEAF~~F~~G~~M~~N~~V~~NPLSKP~~Q~~HVSYTF~~L~~PNMS~~Y~~FEFL~~E~~V.....  
 BnaA06.GH3-19.a LPLVSPF~~Y~~GSSEAF~~F~~G~~L~~N~~L~~EPLCKP~~Q~~HVSYTF~~L~~PNMS~~Y~~FEFL~~E~~V.....  
 BnaA09.GH3-19.b LPLVSKV~~Y~~ASSEVF~~Y~~G~~L~~N~~L~~NPLSKP~~Q~~HVSYTF~~L~~PNMS~~Y~~FEFL~~I~~R~~V~~.....  
 consensus>70 lplvs..Y.ssE..fg.N..pl.kp.dvs%t..P.m.YFEF.....

|                 |                             | 380        | 390           | 400      |
|-----------------|-----------------------------|------------|---------------|----------|
| AtGH3-1         | .....GGTK                   | AVELVDVNI  | GKEYELVVTTY   | AGLCRYR  |
| AtGH3-2         | GAAEAS.....LDETS            | LVELANVEV  | GKEYELVITTY   | AGLYRYR  |
| AtGH3-3         | .....EKSE                   | LVELADVEV  | GKEYELVITTY   | AGLNYRYR |
| AtGH3-4         | GGV.....EATS                | LVELADVEV  | GKEYELVITTY   | AGLYRYR  |
| AtGH3-5         | PKALTE.....KEQQE            | LVDLVDVKL  | GQEEYELVVTTY  | AGLCRYR  |
| AtGH3-6         | PKALTE.....KEQQE            | LVDLVDVKL  | GQEEYELVVTTY  | AGLYRYR  |
| AtGH3-7         | .D.....GDKND                | VVDLADVKK  | GCCYEAVVTNFS  | SGLYRIR  |
| AtGH3-8         | .D...A.....GDKTE            | IVDLVDVKL  | GCYEPVLTNHS   | GLHRYK   |
| AtGH3-9         | PC.....DK                   | VVDLVNVKL  | GRYELVVTF     | AGLYRYR  |
| AtGH3-10        | .YRRQN.QSDICIDGDFVEDK       | PVPLSQVKL  | GQEEYELVLTFT  | TGLYRYR  |
| AtGH3-11        | .SETGE.....GEEK             | PVGLTQVKI  | GEEYEVVITNY   | AGLYRYR  |
| AtGH3-12        | .D...G.....GDKND            | VVDLEDVKL  | GCTYEPVVTNFS  | AGLYRMR  |
| AtGH3-13        | .....K.....KDQOEAGLDPIENHV  | VVDLVDVKI  | GHDYEPVVTFS   | AGLYRYR  |
| AtGH3-14        | .....E.....KDY.ESGHDPAENPV  | VVDLVDVKI  | GHDYEPVVTFS   | AGLYRYR  |
| AtGH3-15        | .....E.....KDHQEAGHDPTTEKPV | VVDLVDVKI  | GHDYEPVVTFS   | AGLYRYR  |
| AtGH3-16        | .....V.....KDRQEAGHVPA.DPV  | VVDLVDVKI  | GHDYELVTF     | SGLYRIR  |
| AtGH3-17        | DDDDDA.....LKEDL            | IVNLVNVEV  | GQYIEIVITFT   | TGLYRYR  |
| AtGH3-18        | .D...HK.....GDMAS           | IVDLVDVKL  | GCYEPVVTNYF   | GLHRYL   |
| AtGH3-19        | .D...HE.....EDMNT           | IVDLVGVKL  | GCYETVVTSYF   | GLHRYL   |
| BraX.GH3-1.a    | .....GGSK                   | AVELVDVKI  | GKEYELVVTTY   | AGLCRYR  |
| BraX.GH3-2.a    | GAAG.....DETE               | LVELADVEV  | GKEYELVITTY   | AGLYRYK  |
| BraA09.GH3-3.a  | .....RTTE                   | LVELADVEV  | GKEYELVITTY   | AGLYRYR  |
| BraA01.GH3-5.a  | PKALTE.....KEQQE            | LVDLVDVKL  | GQEEYELVVTTY  | AGLCRYR  |
| BraA03.GH3-5.b  | PKALTE.....KEQQE            | LVDLVDVKL  | GQEEYELVVTTY  | AGLCRYR  |
| BraA02.GH3-6.a  | PKALTE.....KEQKE            | LVDLVDVKL  | GQEEYELVVTTY  | AGLYRYR  |
| BraA03.GH3-6.b  | PKALTE.....KEQQE            | LVDLVDVKL  | GQEEYELVVTTY  | AGLYRYR  |
| BraA06.GH3-7.a  | .E.....GGNGD                | VVDLADVKK  | GCSYQLLVTNLWG | LYRMR    |
| BraA08.GH3-7.b  | .D.....GDEND                | VVDLADLKL  | GCSYELVVTNFS  | SGLYRIR  |
| BraA02.GH3-8.a  | .D...A.....GDKVE            | IVDLVDVKL  | GSHYEPVLTNHS  | GLHRRK   |
| BraA03.GH3-8.b  | .D...A.....GDEVE            | IVDLVDVKL  | GCHYETLVNHS   | GLHRYK   |
| BraA03.GH3-8.c  | .G...E.....G.KDT            | IFDLVNVKL  | GLYELVVTNY    | AGLHRYR  |
| BraA03.GH3-8.d  | .G...E.....G.DDT            | IVDLVNVKL  | GRYELIVTNY    | AGLHRYR  |
| BraA06.GH3-8.e  | .D.....GE                   | IVDLVNVKL  | GHHYEPF       | GLHRCR   |
| BraA06.GH3-8.f  | .D...G.....GAEGE            | IVDLVNVKL  | GRYIEIVTNFS   | GLHRCR   |
| BraA09.GH3-8.g  | .D...K.....GNEGE            | IVDLVNVEI  | GSYIEPLITNY   | YGLHRYR  |
| BraA09.GH3-8.h  | .D.ADG.....EATGE            | IVDLVDVKS  | GQYIEPLVTNY   | SGLYRCR  |
| BraA10.GH3-8.i  | .D...E.....GNKGE            | IVDLGNVKI  | GSYIEPLITNY   | YGLHRYR  |
| BraA09.GH3-10.a | .YRQQT.HQQDLCSEGDVEEK       | PVPLSQVKL  | GQEEYELVLTFT  | TGLYRYR  |
| BraA03.GH3-11.a | .SETGE.....TEQEP            | PVGLTEVKI  | GQEEYEVVITNY  | AGLYRYR  |
| BraA04.GH3-11.b | .S...E.....TEKE             | PVGLTDVKI  | GEEYEVVITNY   | AGLYRYK  |
| BraA05.GH3-11.c | .SETGE.....GEQE             | PVGLTEVKV  | GQEEYEVLTNY   | AGLYRYR  |
| BraA02.GH3-12.a | .D.....GDKRD                | VVDLQDVKL  | GCTYEPVVTNFS  | AGLYRMR  |
| BraA03.GH3-12.b | .D.....GDKRD                | VVDLQDVKL  | GCTYEPVVTNFS  | AGLYRMR  |
| BraA06.GH3-12.c | .E.....EGSDD                | VVDLADVKK  | GCSYQLLVTNLWG | LYRMR    |
| BraA10.GH3-12.d | .D.....GEKRD                | VVDLHDVKI  | GCTYEPVVTNFS  | AGLYRMR  |
| BraA10.GH3-14.a | .....K.....KD.QEAGHDPLVNPV  | IVDLVDVKV  | GHDYEPVVTFS   | SGLYRYR  |
| BraA03.GH3-15.a | .....E.....KDHQETSHPDPTKN   | IVDLVDVKV  | GHDYEPVITFS   | SGLYRYR  |
| BraA07.GH3-15.b | .....K.....KYHQETGHPDV      | VVDLVDVKV  | GHDYEPVITFS   | SGLYRYR  |
| BraA02.GH3-16.a | .....E.....KDHQETGHNPTKNPV  | VVDLADVKKI | GHDYELIITFT   | SGLYRDR  |
| BraA07.GH3-17.a | .EDDDA.....IKEDL            | IVDLVNVEV  | GRYIEIVITFT   | TGLYRYR  |
| BraA09.GH3-17.b | DDDDDA.....LKEDL            | IVDLVNVEV  | GRYIEIVITFT   | TGLYRYR  |
| BraAX.GH3-17.c  | .DDVSL.....TDKDR            | IVDLVSVEI  | GRYELIITFT    | AGLYRYR  |
| BraA04.GH3-19.a | .D...E.....GNNAG            | VVDLVDVKL  | GHLIDPV       | GLHRCR   |
| BraA06.GH3-19.b | .DVEGG.....TSGE             | VLDLVDVKL  | GRYELVVTNFS   | SGLHRCR  |
| BraA09.GH3-19.c | .D.ADG.....EDTSE            | IVDLVDVTL  | GYIEPLVTNY    | SGLHRCR  |
| BraA09.GH3-19.d | .D.DDG.....ETTGE            | IVDLVNVKL  | GSYIEPLVTNFS  | AGLHRCR  |
| BraAX.GH3-19.e  | .D...HE.....GDMTS           | IVDLVNVKL  | GCYIEPVVTCF   | GLNRYL   |
| BolC09.GH3-1.a  | .....GGSK                   | AVELVDVKI  | GKEYELVVTTY   | AGLCRYR  |
| BolC01.GH3-2.a  | .GAG.....DETE               | LVELADVEV  | GKEYELVITTY   | AGLYRYK  |
| BolC08.GH3-3.a  | .....ERTE                   | LVELADVEV  | GKEYELVITTY   | AGLYRYR  |
| BolC01.GH3-5.a  | PKALTE.....KEQQE            | LVDLVDVKL  | GQEEYELVVTTY  | AGLCRYR  |
| BolC07.GH3-5.b  | PKALTE.....KEQQE            | LVDLVDVKL  | GQEEYELVVTTY  | AGLCRYR  |
| BolC02.GH3-6.a  | PKALTE.....KEQQE            | LVDLVDVKL  | GQEEYELVVTTY  | AGLYRYR  |
| BolC03.GH3-6.b  | PKALTE.....KEQQE            | LVDLVDVKL  | GQEEYELVVTTY  | AGLYRYR  |
| BolC06.GH3-7.a  | .E.....GDNGD                | VLDLADVKK  | GSSYKLLVTNLWG | LYRMR    |
| BolC01.GH3-8.a  | .D...E.....GNDDA            | IVDLVDVKL  | GSYELVVTTY    | SGLHRCR  |
| BolC03.GH3-8.b  | .D...A.....GDEVK            | IVDLVDVKL  | GCHYESLVTNHS  | GLHRCR   |
| BolC07.GH3-8.c  | .G...E.....G.NDT            | IVDLVNVKL  | GRYELVVTNY    | AGLHRYR  |
| BolC08.GH3-8.d  | .G.VDG.....GTEGE            | IVDLVDVKL  | GHHYIEPLVTNY  | YGLHRCR  |
| BolC09.GH3-8.e  | .D...E.....GNKGE            | IVDLVNVKI  | GSYIEPLITNY   | YGLHRYR  |
| BolC09.GH3-10.a | .YRQQT.QQDLCSEGDVEEK        | PVPLSQVKL  | GQEEYELVLTFT  | TGLYRYR  |
| BolC03.GH3-11.a | .SETGE.....TEQEP            | PVGLTEVKI  | GQEEYEVVITNY  | AGLYRYR  |
| BolC04.GH3-11.b | .SETEE.....TEEE             | PVGLTEVKI  | GQEEYEVVITNY  | AGLYRYK  |
| BolCX.GH3-11.c  | .SETGE.....GEQE             | PVGLTEVKV  | GQEEYEVLTNY   | AGLYRYR  |
| BolC03.GH3-12.a | .D.....GDKRD                | VVDLQDVKL  | GCTYEPVVTNFS  | AGLYRMR  |
| BolC09.GH3-12.b | .D.....GDKRD                | VVDLHDVKV  | GCTYEPVVTNFS  | AGLYRMR  |
| BolC09.GH3-14.a | .....K.....KD.QEAGHDPLVNPV  | VVDLVDVKV  | GHDYEPVVTFS   | SGLYRYR  |
| BolC03.GH3-15.a | .....E.....KDHQETSHPDPTKN   | IVDLVDVKV  | GHDYEPVITFS   | SGLYRYR  |
| BolCX.GH3-16.a  | .....E.....KDHQETGHNPTKNPV  | VVDLADVKKI | GHDYELIITFT   | SGLYRYR  |
| BolC07.GH3-17.a | .EDDDA.....IKEDL            | IVDLVNVEV  | GRYIEIVITFT   | TGLYRYR  |
| BolC08.GH3-17.b | .DDVSL.....MDKDR            | IVDLVNVEI  | GRYELIITFT    | AGLYRYR  |
| BolC08.GH3-19.a | .D.ADG.....EDTSE            | IVDLVDVTL  | GHHYIEPLVTNY  | SGLHRCR  |
| BnaA09R.GH3-1.a | .....GGSK                   | AVELVDVKI  | GKEYELVVTTY   | AGLCRYR  |
| BnaCX.GH3-1.a   | .....GGSK                   | AVELVDVKI  | GKEYELVVTTY   | AGLCRYR  |
| BnaA01.GH3-2.a  | GAAG.....DETE               | LVELADVEV  | GKEYELVITTY   | AGLYRYK  |
| BnaC01.GH3-2.a  | GGAG.....DETE               | LVELADVEV  | GKEYELVITTY   | AGLYRYK  |
| BnaC08.GH3-3.a  | .....RTTE                   | LVELADVEV  | GKEYELVITTY   | AGLYRYR  |
| BnaC08.GH3-3.a  | .....ERTE                   | LVELADVEV  | GKEYELVITTY   | AGLYRYR  |
| BnaA01.GH3-5.a  | ...ALTE.....KEQQE           | LVDLVDVKL  | GQEEYELVVTTY  | AGLCRYR  |
| BnaA03.GH3-5.b  | PKALTE.....KEQQE            | LVDLVDVKL  | GQEEYELVVTTY  | AGLCRYR  |
| BnaC01.GH3-5.a  | PKALTE.....KEQQE            | LVDLVDVKL  | GQEEYELVVTTY  | AGLCRYR  |
| BnaC07.GH3-5.b  | PKALTE.....KEQQE            | LVDLVDVKL  | GQEEYELVVTTY  | AGLCRYR  |
| BnaA03.GH3-6.a  | ...ALTE.....KEQQD           | LVDLVDVKL  | GQEEYELVVTTY  | AGLYRYR  |
| BnaAX.GH3-6.b   | PKALTE.....KEQQE            | LVDLVDVKL  | GQEEYELVVTTY  | AGLYRYR  |
| BnaC03.GH3-6.a  | PKALTE.....KEQQE            | LVDLVDVKL  | GQEEYELVVTTY  | AGLYRYR  |
| BnaCX.GH3-6.b   | PKALTE.....KEQQE            | LVDLVDVKL  | GQEEYELVVTTY  | AGLYRYR  |
| BnaA06.GH3-7.a  | .E.....GGNGD                | VVDLADVKK  | GCSYQLLVTNLWG | LYRMR    |
| BnaA08.GH3-7.b  | .D.....GDEND                | VVDLADLKL  | GCSYELVVTNFS  | SGLYRIR  |
| BnaC06.GH3-7.a  | .E.....GDNGD                | VLDLADVKK  | GSSYKLLVTNLWG | LYRMR    |
| BnaA03.GH3-8.a  | .D...A.....GDEVE            | IVDLVDVKL  | GCHYETLVNHS   | GLHRCR   |
| BnaA03.GH3-8.b  | .G...E.....G.KDT            | IVDLVNVKL  | GLYELVVTNY    | AGLHRYR  |
| BnaA03.GH3-8.c  | .G...E.....G.DDT            | IVDLVNVKL  | GRYELIVTNY    | AGLHRYR  |
| BnaA06.GH3-8.d  | .D.....GE                   | IVDLVNVKL  | GHHYIEPLVTNFS | AGLHRCR  |

|                  |                            |                              |              |       |    |    |    |     |
|------------------|----------------------------|------------------------------|--------------|-------|----|----|----|-----|
| BnaA06.GH3-8.e   | .D...G.....GAEGE.....      | IVDLVNVKLG                   | RY..         | ..... | .. | .. | .. | ..  |
| BnaA09.GH3-8.f   | .D.ADG.....EATGE.....      | IVDLVDVKLG                   | AYEP         | LV    | TN | YS | GS | LYR |
| BnaA09.GH3-8.g   | .D.GD.....GE.....          | IVDLVNVKLG                   | GYEP         | LV    | TN | YS | GS | LYR |
| BnaAX.GH3-8.h    | .D...A.....GDKVE.....      | IVDLVDVKLG                   | SHYEP        | LV    | TN | YS | GS | LYR |
| BnaAX.GH3-8.i    | .G.VDG.....GTEGE.....      | IVDLVDVKLG                   | HHYEP        | LV    | TN | YS | GS | LYR |
| BnaC01.GH3-8.a   | .D...E.....GNDDA.....      | IVDLVDVKLG                   | SHYEP        | LV    | TN | YS | GS | LYR |
| BnaC02.GH3-8.b   | .D...A.....GDKVE.....      | IVDLVDVKLG                   | SHYEP        | LV    | TN | YS | GS | LYR |
| BnaC02.GH3-8.c   | .D...A.....GDKVE.....      | IVDLVDVKLG                   | SHYEP        | LV    | TN | YS | GS | LYR |
| BnaC02.GH3-8.d   | .D...A.....GDKVE.....      | IVDLVDVKLG                   | SHYEP        | LV    | TN | YS | GS | LYR |
| BnaC07.GH3-8.e   | .G...E.....G.NDT.....      | IVDLVNVKLG                   | RYYEL        | LV    | TN | YS | GS | LYR |
| BnaC09.GH3-8.f   | .D...E.....GNKGE.....      | IVDLVHVEIG                   | SHYEP        | LV    | TN | YS | GS | LYR |
| BnaCX.GH3-8.g    | .D...G.....GTEGE.....      | IVDLVNVKLG                   | HHYEP        | LV    | TN | YS | GS | LYR |
| BnaA05.GH3-9.a   | PC.....DK.....             | VVDLVDVKLG                   | RYYEL        | LV    | TN | YS | GS | LYR |
| BnaC04.GH3-9.a   | PC.....DK.....             | VVDLVDVKLG                   | RYYEL        | LV    | TN | YS | GS | LYR |
| BnaA03.GH3-10.a  | .HRQQN.QQDMTSDGDFVEEK..... | PVPLSQVKLG                   | QEEYEP       | LV    | TN | YS | GS | LYR |
| BnaA09.GH3-10.b  | .YRQQTQQDLCSGDFVEEK.....   | PVPLSQVKLG                   | QEEYEL       | LV    | TN | YS | GS | LYR |
| BnaC09.GH3-10.a  | .YRQQT.QQDLCSGDFVEEK.....  | PVPLSQVKLG                   | QEEYEL       | LV    | TN | YS | GS | LYR |
| BnaA03.GH3-11.a  | .SETGE.....TEERP.....      | PVGLTEVKVG                   | QEEYEP       | LV    | TN | YS | GS | LYR |
| BnaA04R.GH3-11.b | .S...E.....TEKE.....       | PVGLTDVKIG                   | QEEYEP       | LV    | TN | YS | GS | LYR |
| BnaA05.GH3-11.c  | .SETGE.....GEQE.....       | PVGLTEVKVG                   | QEEYEP       | LV    | TN | YS | GS | LYR |
| BnaC04.GH3-11.a  | .SETEE.....TEEE.....       | PVGLTEVKIG                   | QEEYEP       | LV    | TN | YS | GS | LYR |
| BnaCX.GH3-11.b   | .SETGD.....TEQEP.....      | PVGLTEVKIG                   | QEEYEP       | LV    | TN | YS | GS | LYR |
| BnaA02.GH3-12.a  | .D.....GDKRD.....          | VVDLQDVKLG                   | GCTYEP       | LV    | TN | YS | GS | LYR |
| BnaA03.GH3-12.b  | .D.....GDKRD.....          | VVDLQDVKLG                   | GCTYEP       | LV    | TN | YS | GS | LYR |
| BnaA06.GH3-12.c  | .E.....EGSDD.....          | VVDLADVKLG                   | CSYQLLITNLWG | LYR   |    |    |    |     |
| BnaA10.GH3-12.d  | .D.....GEKRD.....          | VVDLHDVKVG                   | GCTYEP       | LV    | TN | YS | GS | LYR |
| BnaC02.GH3-12.a  | .D.....GDKRD.....          | VVDLQDVKLG                   | GCTYEP       | LV    | TN | YS | GS | LYR |
| BnaC03.GH3-12.b  | .D.....GDKRD.....          | VVDLQDVKLG                   | GCTYEP       | LV    | TN | YS | GS | LYR |
| BnaC09.GH3-12.c  | .D.....GDKRD.....          | VVDLHDVKVG                   | GCTYEP       | LV    | TN | YS | GS | LYR |
| BnaA10.GH3-14.a  | .....K.....KD.QEAGHDPLVNPV | VIDLVDVKVG                   | GHDYEP       | LV    | TN | YS | GS | LYR |
| BnaC09.GH3-14.a  | .....K.....KD.QEAGHDPLVNPV | VVDLVDVKVG                   | GHDYEP       | LV    | TN | YS | GS | LYR |
| BnaA03.GH3-15.a  | .....E.....KDHQETSHDPTKN.. | IVDLVDVKVG                   | GHDYEP       | LV    | TN | YS | GS | LYR |
| BnaC03.GH3-15.a  | .....E.....KDHQETSHDPTKN.. | IVDLVDVKVG                   | GHDYEP       | LV    | TN | YS | GS | LYR |
| BnaAX.GH3-16.a   | .....E.....KDHQETGHNPTKNPV | VVDLADVKIG                   | GHDYEL       | LV    | TN | YS | GS | LYR |
| BnaC02.GH3-16.a  | .....E.....KDHQETGHNPTKNPV | VVDLADVKIG                   | GHDYEL       | LV    | TN | YS | GS | LYR |
| BnaA07.GH3-17.a  | DDDDDA.....LKEDL.....      | IVDLVNVEVG                   | GRYIEI       | LV    | TN | YS | GS | LYR |
| BnaA08.GH3-17.b  | .....R.....                | IVDLVSVEIG                   | GRYIEL       | LV    | TN | YS | GS | LYR |
| BnaA09.GH3-17.c  | DDDDDA.....LKEDL.....      | IVDLVNVEVG                   | GRYIEI       | LV    | TN | YS | GS | LYR |
| BnaC08.GH3-17.a  | .....R.....                | IVDLVNVEIG                   | GRYIEL       | LV    | TN | YS | GS | LYR |
| BnaCX.GH3-17.b   | DDDDDA.....LKEDL.....      | IVDLVNVEVG                   | GRYIEI       | LV    | TN | YS | GS | LYR |
| BnaCX.GH3-17.c   | DDDDDA.....LKEDL.....      | IVDLVNVEVG                   | GRYIEI       | LV    | TN | YS | GS | LYR |
| BnaA05GH3-18.a   | .D..HE.....GDMTS.....      | IVDLVNVKLG                   | CSYEP        | LV    | TN | YS | GS | LYR |
| BnaCX.GH3-18.a   | .D.DDG.....GTTGE.....      | IVDLVNVKLG                   | CSYEL        | LV    | TN | YS | GS | LYR |
| BnaA06.GH3-19.a  | .D.VDGG.....TTSGE.....     | VLDLVDVKLG                   | RYYEL        | LV    | TN | YS | GS | LYR |
| BnaA09.GH3-19.b  | .D.ADG.....EDTSE.....      | IVDLVDVTLG                   | RYYEL        | LV    | TN | YS | GS | LYR |
| consensus>70     |                            | .vdL.dvk.G..ye.vvt.y.g.l.r.r |              |       |    |    |    |     |



|                 | 410   | 420  | 430  | 440      | 450       | 460 |
|-----------------|-------|------|------|----------|-----------|-----|
| AtGH3-1         | VGDIL | RVTG | FHNS | APQFHFVR | RKNNVLSI  | DS  |
| AtGH3-2         | VGDIL | RVTG | FHNS | APQFKFI  | RKNNVLSV  | ES  |
| AtGH3-3         | VGDIL | QVTG | FYNS | APQFKFVR | RKNNVLSI  | ES  |
| AtGH3-4         | VGDIL | RVTG | FHNS | APQFKFI  | RKNNVLSI  | ES  |
| AtGH3-5         | VGDLL | RVTG | FKNK | APQFSFI  | CRKNVLSI  | DS  |
| AtGH3-6         | VGDVL | SVAG | FKNK | APQFSFI  | CRKNVLSI  | DS  |
| AtGH3-7         | VGDIL | VVTG | FHNK | APQFRFI  | RRDNVLSI  | DL  |
| AtGH3-8         | MGDIL | LVTG | FYNN | APQFRFVR | RGNLTLSI  | HL  |
| AtGH3-9         | IGDVL | QVAG | FYNG | APQFRFI  | CRNNVLSI  | DL  |
| AtGH3-10        | LGDVV | EVTG | FHHG | TPKLSFI  | YRRKLILT  | INI |
| AtGH3-11        | LGDVV | KVIG | FYNN | TPQLKFI  | CRNNLILS  | INI |
| AtGH3-12        | VGDIL | LVTG | FYNN | APQFKFVR | RKNNVLSI  | DS  |
| AtGH3-13        | VGDLL | RVTG | FYNN | SPHFREFV | GRQKVLSI  | LM  |
| AtGH3-14        | LGDVL | RVTG | FYNN | APQFHFV  | GRQKVLSI  | DM  |
| AtGH3-15        | VGDVL | RATG | FYNN | APHFCFV  | GRQKVLSI  | DM  |
| AtGH3-16        | LGDVL | RVTG | FHNN | APQFVFV  | GRQNVLSI  | DL  |
| AtGH3-17        | VGDIL | KVTG | FHNK | APQFRFVR | QRRNVLSI  | DT  |
| AtGH3-18        | IGDIL | QVTG | FYNN | TPQFRFVR | RRKNVLSV  | RS  |
| AtGH3-19        | IGDIL | QVTG | FYNN | TPQFRFVR | RRKNIVLSV | NS  |
| BraX.GH3-1.a    | VGDIL | RVTG | FHNS | APQFHFVR | RKNNVLSI  | DS  |
| BraX.GH3-2.a    | VGDVL | RVTG | FHNS | APQFKFI  | RKNNVLSI  | ES  |
| BraA09.GH3-3.a  | VGDIL | QVTG | FYNS | APQFKFVR | RKNNVLSI  | ES  |
| BraA01.GH3-5.a  | VGDLL | KVTG | FKNK | APQFSFI  | CRKNVLSI  | DS  |
| BraA02.GH3-5.b  | VGDLL | RVTG | FKNK | APQFSFI  | CRKNVLSI  | DS  |
| BraA02.GH3-6.a  | VGDVL | RVAG | FKNK | APQFSFI  | CRKNVLSI  | DS  |
| BraA03.GH3-6.b  | VGDVL | RVAG | FKNK | APQFSFI  | CRKNVLSI  | DS  |
| BraA06.GH3-7.a  | IGDIV | KVTG | FHNK | APKFRVI  | IGRENTLSI | DT  |
| BraA08.GH3-7.b  | VGDIL | LVTG | FYNN | APQLRFI  | RRDNVLSI  | DM  |
| BraA02.GH3-8.a  | MGDVL | QVTG | FYNS | APQFRFVR | RGNLTLSV  | HL  |
| BraA03.GH3-8.b  | MGDIV | QVTG | FYNN | APQFRFVR | RRKNVLSV  | HME |
| BraA03.GH3-8.c  | VGDVL | QVTG | FYNS | APQFKFI  | RRQNTVLS  | VY  |
| BraA03.GH3-8.d  | VGDVL | QVTG | FYNS | APQFKFI  | RRQNVLSV  | VY  |
| BraA06.GH3-8.e  | VGDVL | QVTG | FYNN | APQFRFVR | RRKNIVLSV | YA  |
| BraA06.GH3-8.f  | VGDVL | EVTG | FYNN | APQLRFV  | RKNNALS   | VH  |
| BraA09.GH3-8.g  | MGDIL | QVTG | FYNN | APQFRFVR | GRKKLVSV  | NLE |
| BraA09.GH3-8.h  | VGDVL | HVTG | FYNN | APQFRFVR | RRKNIVLSI | FS  |
| BraA10.GH3-8.i  | MGDIL | QVSG | FYND | APQFRFVR | RRKNVLSV  | LE  |
| BraA09.GH3-10.a | LGDVV | EVTG | FHHG | TPKLSFI  | YRRKLILT  | INI |
| BraA03.GH3-11.a | LGDVV | KVIG | FYNN | TPQLKFI  | CRNNLILS  | INI |
| BraA04.GH3-11.b | LGDVV | RIIG | FYNN | TPQLKFI  | CRNNLILS  | INI |
| BraA05.GH3-11.c | LGDVV | KIMS | FYNN | TPQLKFI  | CRNNLILS  | INI |
| BraA02.GH3-12.a | VGDVL | LVTG | FYNN | APQFKFVR | RKNNVLSI  | DS  |
| BraA03.GH3-12.b | VGDVL | VVTG | FYNN | APQFKFVR | RKNNVLSI  | DS  |
| BraA06.GH3-12.c | IGDML | KVTG | FHNK | APQFRFM  | GRENTLSI  | DT  |
| BraA10.GH3-12.d | VGDVL | LVTG | FYNN | APQFRFVR | RKNNVLSI  | DS  |
| BraA10.GH3-14.a | LGDVL | RVTG | FYNN | APQFHFV  | GRNNVLSI  | DM  |
| BraA03.GH3-15.a | LGDVL | RVTG | FYNN | APQFHFV  | GRNNVLSI  | DM  |
| BraA02.GH3-15.b | LGDVL | RVTG | FYNN | APQFRFVR | GRQKVLSI  | DM  |
| BraA02.GH3-16.a | MGDVL | RVTG | FYNN | APQFVFV  | GRQKVLSM  | DI  |
| BraA07.GH3-17.a | VGDIL | KVTG | FYNN | APQFRFVR | RRKNVLSI  | DT  |
| BraA09.GH3-17.b | VGDIL | KVTG | FHNK | APQFRFVR | QRRNVLSI  | DT  |
| BraAX.GH3-17.c  | VGDIL | KVTG | FHNK | APQFSFI  | RRKNVLSI  | DT  |
| BraA04.GH3-19.a | ..... | VVTG | FYNN | TPQFRFVR | RKNDIVSV  | HI  |
| BraA06.GH3-19.b | VGDVL | EATG | FYNN | TPQFRFVR | RKNTVLSV  | HLE |
| BraA09.GH3-19.c | VGDVL | QVTG | FYNN | TPQFRFVR | RRNTVLCV  | DV  |
| BraA09.GH3-19.d | VGDVL | QVTG | FYNN | TPQFRFVR | RKNDIVSV  | HI  |
| BraAX.GH3-19.e  | IGDIL | EVTG | FYNN | TPQFRFVR | RKNNVLSV  | ET  |
| BolC09.GH3-1.a  | VGDIL | RVTG | FHNS | APQFHFVR | RKNNVLSI  | DS  |
| BolC01.GH3-2.a  | VGDVL | RVTG | FYNS | APQFKFI  | RKNNVLSI  | ES  |
| BolC08.GH3-3.a  | VGDIL | QVTG | FYNS | APQFKFVR | RKNNVLSI  | ES  |
| BolC01.GH3-5.a  | VGDLL | KVTG | FKNK | APQFSFI  | CRKNVLSI  | DS  |
| BolC07.GH3-5.b  | VGDLL | RVTG | FKNK | APQFSFI  | CRKNVLSI  | DS  |
| BolC02.GH3-6.a  | VGDVL | RVAG | FKNK | APQFSFI  | CRKNVLSI  | DS  |
| BolC03.GH3-6.b  | VGDVL | RVAG | FKNK | APQFSFI  | CRKNVLSI  | DS  |
| BolC06.GH3-7.a  | IGDMV | KVTG | FYNN | APQFRFL  | GRNALLSI  | DT  |
| BolC01.GH3-8.a  | VGDVL | QVTG | FYNS | APQFKFVR | RKNNVLSI  | DS  |
| BolC03.GH3-8.b  | ..... | VVTG | FYNS | APQFRFS  | RRGNVLSV  | HME |
| BolC07.GH3-8.c  | VGDVL | QVTG | FYNS | VFPQKFI  | RRNNVLSV  | LE  |
| BolC08.GH3-8.d  | VGDVL | QVTG | FYNN | APQFRSV  | RKNNIVLSI | YV  |
| BolC09.GH3-8.e  | MGDIL | QVSG | FYND | APQFRFVR | RKNNVLSV  | LE  |
| BolC09.GH3-10.a | LGDVV | EVTG | FHHG | TPKLSFI  | YRRKLILT  | INI |
| BolC03.GH3-11.a | LGDVV | KVIG | FYNN | TPQLKFI  | CRNNLILS  | INI |
| BolC04.GH3-11.b | LGDVV | KIIG | FYNN | TPQLKFI  | CRNNLILS  | INI |
| BolCX.GH3-11.c  | LGDVV | KIMS | FYNN | TPQLKFI  | CRNNLILS  | INI |
| BolC03.GH3-12.a | VGDVL | VVTG | FYNN | APQFKFVR | RKNNVLSI  | DS  |
| BolC09.GH3-12.b | VGDVL | LVTG | FYNN | APQFRFVR | RKNNVLSI  | DS  |
| BolC09.GH3-14.a | LGDVL | RVTG | FYNN | APQFHFV  | GRNNVLSI  | DM  |
| BolC03.GH3-15.a | LGDVL | RVTG | FYNN | APQFHFV  | GRNNVLSI  | DM  |
| BolCX.GH3-16.a  | LGDVL | RVTG | FYNN | APQFVFV  | GRQKVLSM  | DI  |
| BolC07.GH3-17.a | VGDIL | KVTG | FHNK | APQFRFVR | RRKNVLSI  | DT  |
| BolC08.GH3-17.b | VGDIL | KVTG | FHNK | APQFSFI  | RRKNVLSI  | DT  |
| BolC08.GH3-19.a | VGDIL | QVTG | FYNN | TPQFRFVR | RRNTVLCV  | DV  |
| BnaA09R.GH3-1.a | VGDIL | RVTG | FHNS | APQFHFVR | RKNNVLSI  | DS  |
| BnaCX.GH3-1.a   | VGDIL | RVTG | FHNS | APQFHFVR | RKNNVLSI  | DS  |
| BnaA01.GH3-2.a  | VGDVL | RVTG | FHNS | APQFKFI  | RKNNVLSI  | ES  |
| BnaC01.GH3-2.a  | VGDVL | RVTG | FYNS | APQFKFI  | RKNNVLSI  | ES  |
| BnaA09.GH3-3.a  | VGDIL | QVTG | FYNS | APQFKFVR | RKNNVLSI  | ES  |
| BnaC08.GH3-3.a  | VGDIL | QVTG | FYNS | APQFKFVR | RKNNVLSI  | ES  |
| BnaA01.GH3-5.a  | VGDLL | KVTG | FKNK | APQFSFI  | CRKNVLSI  | DS  |
| BnaA03.GH3-5.b  | VGDLL | RVTG | FKNK | APQFSFI  | CRKNVLSI  | DS  |
| BnaC01.GH3-5.a  | VGDLL | KVTG | FKNK | APQFSFI  | CRKNVLSI  | DS  |
| BnaC07.GH3-5.b  | VGDLL | RVTG | FKNK | APQFSFI  | CRKNVLSI  | DS  |
| BnaA03.GH3-6.a  | VGDVL | RVAG | FKNK | APQFSFI  | CRKNVLSI  | DS  |
| BnaAX.GH3-6.b   | VGDVL | RVAG | FKNK | APQFSFI  | CRKNVLSI  | DS  |
| BnaC03.GH3-6.a  | VGDVL | RVAG | FKNK | APQFSFI  | CRKNVLSI  | DS  |
| BnaCX.GH3-6.b   | VGDVL | RVAG | FKNK | APQFSFI  | CRKNVLSI  | DS  |
| BnaA06.GH3-7.a  | IGDIV | KVTG | FHNK | APKFRVI  | IGRENTLSI | DT  |
| BnaC06.GH3-7.b  | VGDIL | LVTG | FYNN | APQLRFI  | RRDNVLSI  | DM  |
| BnaC06.GH3-7.a  | IGDMV | KVTG | FYNN | APQFRFL  | GRNALLSI  | DT  |
| BnaA03.GH3-8.a  | ..... | VVTG | FYNN | APQFRFA  | RRGNVLSV  | HME |
| BnaA03.GH3-8.b  | VGDVL | QVTG | FYNS | APQFKFI  | RRQNTVLS  | VY  |
| BnaA03.GH3-8.c  | VGDVL | QVTG | FYNS | APQFKFI  | RRQNVLSV  | Y   |
| BnaA06.GH3-8.d  | VGDVL | QVTG | FYNN | APQFRFVR | RKNTVLSV  | YA  |

BnaA06.GH3-8.e .....MRSWSQ.....  
 BnaA09.GH3-8.f VGDVLTHTGTFYNNAPQFRFVRRKNIVLSIFVESTTEEDVLKALDRA.TVVVL..ESSDLML  
 BnaA09.GH3-8.g VGDVLTQVTGTFYNNTPQFRFARRKNIVLSVYVEPTTEEDLLNALTSA.TTLAL..ESSDLIL  
 BnaAX.GH3-8.h MGDVLTQVTGTFYNSAPQFRFVRRGNLVLSVHLEITTEEDLLNAVTHA.KMVL..ESSNML  
 BnaAX.GH3-8.i VGDVLTQVTGTFYNNAPQFRFVRRKNIVLSIYVEESTTEEDLLKALA.....  
 BnaC01.GH3-8.a VGDVLTQVTGTFYNSAPQFRFVRRQNVVISVYLEATTEEDLLKAVKRA.TEVI..ESSNML  
 BnaC02.GH3-8.b MGDVLTQVTGTFYNSAPQFRFVRRGNLVLSVHLEITTEEDLLNAVTHA.KMVL..ESSNML  
 BnaC02.GH3-8.c MGDVLTQVTGTFYNSAPQFRFVRRGNLVLSVHLEITTEEDLLNAVTHA.KMVL..ESSNML  
 BnaC02.GH3-8.d MGDVLTQVTGTFYNSAPQFRFVRRGNLVLSVHLEITTEEDLLNAVTHA.KMVL..ESSNML  
 BnaC07.GH3-8.e VGDVLTQVTGTFYNSVPQFKFIRRRQNVLSVYLEATTEEDLLKGVTHA.TQVL..KSSDML  
 BnaC09.GH3-8.f MGDILTQVSGFYNNAPQFRFVGRKNLVLSVNLVETTEEDILKALNNA.TLVL..QRSDLL  
 BnaCX.GH3-8.g VGDVLTQVTGTFYNNAPQFRFVRRKNAAALSVHLEESTTEEDLLKALARA.TLVL..ESSDLVI  
 BnaA05.GH3-9.a IGDVLTQVAGFYNNAPQFKFICRRNVVLSIDLDKTNEEDLHRSITLA.KKKL..ENKAFL  
 BnaC04.GH3-9.a IGDVLTQVAGFYNNAPQFRFICRRNVVLSIDLDKTNEEDLHRSITLA.KKKL..ENKAFL  
 BnaA03.GH3-10.a LGDVVTEVSGFHNGTPKLSFIYRRKLILNINIDKNTKDLQEVVDKA.SQLL.SKTTQAEV  
 BnaA09.GH3-10.b LGDVVTEVSGFHNGTPKLSFIYRRKLILNINIDKNTKDLQEVVDKA.SQLL.SRTTHAEV  
 BnaC09.GH3-10.a LGDVVTEVSGFHNGTPKLSFIYRRKLILNINIDKNTKDLQEVVDKA.SQLL.SRTTHAEV  
 BnaA03.GH3-11.a LGDVVKIVGFIYNNTPQLKFICRRNLILSINIDKNTKDLQEVVDKA.SQLL.SRTTHAEV  
 BnaA04R.GH3-11.b LGDVVRIGFIYNNTPQLKFICRRNLILSINIDKNTKDLQEVVDKA.SQLL.SRTTHAEV  
 BnaA05.GH3-11.c LGDVVKIMSFYNNTPQLKFICRRNLILSINIDKNTKDLQEVVDKA.SQLL.SRTTHAEV  
 BnaC04.GH3-11.a LGDVVKIIGFIYNNTPQLKFICRRNLILSINIDKNTKDLQEVVDKA.SQLL.SRTTHAEV  
 BnaCX.GH3-11.b LGDVVKIVGFIYNNTPQLKFICRRNLILSINIDKNTKDLQEVVDKA.SQLL.SRTTHAEV  
 BnaA02.GH3-12.a VGDVLTQVTGTFYNNAPQFRFVRRQNVVLSIDSDKTNEEDLFFKALSQA.KLVL..DSSDLTL  
 BnaA03.GH3-12.b VGDVLTQVTGTFYNNAPQFRFVRRQNVVLSIDSDKTNEEDLFFKALSQA.KLVL..DSSDLTL  
 BnaA06.GH3-12.c IGDMLKVTGFHNKAPQFRFMGRENLTLSIDTDRTNKYLFFKALNRA.TLVL..ESSDLRL  
 BnaA10.GH3-12.d VGDVLTQVTGTFYNNAPQFRFVRRQNVVLSIDSDKTNEEDLFFKALSQA.KLVL..DSSDLFL  
 BnaC02.GH3-12.a VGDVLTQVTGTFYNNAPQFRFVRRQNVVLSIDSDKTNEEDLFFKALSQA.KLVL..DSSDLTL  
 BnaC03.GH3-12.b VGDVLTQVTGTFYNNAPQFRFVRRQNVVLSIDSDKTNEEDLFFKALSQA.KLVL..DSSDLTL  
 BnaC09.GH3-12.c VGDVLTQVTGTFYNNAPQFRFVRRQNVVLSIDSDKTNEEDLFFKALSQA.KLVL..DSSDLFL  
 BnaA10.GH3-14.a LGDVLTQVTGTFYNNAPQFHFVGRNKVVLSIDMDKTYEEDLLNAVTA.KLVL..EPHDFVL  
 BnaC09.GH3-14.a LGDVLTQVTGTFYNNAPQFHFVGRNKVVLSIDMDKTYEEDLLNAVTA.KLVL..EPHDFVL  
 BnaA03.GH3-15.a LGDVLTQVTGTFYNNAPQFQVAGRKKVVLSIDMDKTYEEDLLKAVTNA.KLVL..EPHDLML  
 BnaC03.GH3-15.a LGDVLTQVTGTFYNNAPQFQVAGRKKVVLSIDMDKTYEEDLLKAVTNA.KLVL..EPHDLML  
 BnaAX.GH3-16.a MGDVLTQVTGTFYNNAPQFYFVGRQKVVLSMDIDKTYEEDLLHKAHTSA.THL..EPHDLML  
 BnaC02.GH3-16.a LGDVLTQVTGTFYNNAPQFYFVGRQKVVLSMDIDKTYEEDLLHKAHTSA.THL..EPHDLML  
 BnaA07.GH3-17.a VGDILTQVTGFHNKAPQFRFVRRQNVVLSIDTDKTSEEDLLNAVTA.KLVL..LQKPSCLL  
 BnaA08.GH3-17.b VGDILTQVTGFHNKAPQFSFVRRQNVVLSIDTDKTSEEDLLMKAHTQA.KLVL..LQGLFLL  
 BnaA09.GH3-17.c VGDILTQVTGFHNKAPQFRFVRRQNVVLSIDTDKTSEEDLLNAVTA.KLVL..LQKPSCLL  
 BnaC08.GH3-17.a VGDILTQVTGFHNKAPQFSFVRRQNVVLSIDTDKTSEEDLLMKAHTQA.KLVL..LQGLFLL  
 BnaCX.GH3-17.b VGDILTQVTGFHNKAPQFRFVRRQNVVLSIDTDKTSEEDLLNAVTA.KLVL..LQKPSCLL  
 BnaCX.GH3-17.c VGDILTQVTGFHNKAPQFRFVRRQNVVLSIDTDKTSEEDLLNAVTA.KLVL..LQKPSCLL  
 BnaA05GH3-18.a IGDILEVTGFIYNNTPQFRFVRRKNMVLSVETETTEEDILKALARA.TFVL..ESSNML  
 BnaCX.GH3-18.a VGDVLTQVTGTFYNNTPQFRFVRRKNIVLSDVDEPTTEEDILKALARA.TVVL..ESSDLIL  
 BnaA06.GH3-19.a VGDVLEATGYNNTPQFRFVRRKNIVLSDVDEPTTEEDILKALARA.TVVL..ESSDLIL  
 BnaA09.GH3-19.b VGDVLTQVTGTFYNNTPQFRFVRRKNIVLSDVDEPTTEEDILKALARA.TVVL..ESSDLIL  
 consensus>70 .gdvltvtgf.n.apqf.fv.r.n.vlsid.d.t.#.dl..av..a....1.....1

|                 | 470   | 480        | 490                                   |
|-----------------|-------|------------|---------------------------------------|
| AtGH3-1         | AEYTS | YADTSTI.P  | GHVLYWEL LVR....DGERQ.....PSHETI      |
| AtGH3-2         | IEYTS | YAETKTI.P  | GHVLIYWEL LGR....DQSNAL.....MSEEV     |
| AtGH3-3         | IEYTS | YAETKTI.P  | GHVLIYWEL LVK....DQTNP.....PNDEV      |
| AtGH3-4         | IEYTS | YADTKTI.P  | GHVLIYWEL LSR....DQSNAL.....PSDEV     |
| AtGH3-5         | SEYTS | YADTSSI.P  | GHVLFWEL CLDGNT                       |
| AtGH3-6         | SEYTS | YADTSSI.P  | GHVLFWEL CLNGNT                       |
| AtGH3-7         | IDFTS | YADI STI.P | GHVVVYWEV KNKN....EDKSKKHI..ELKEET    |
| AtGH3-8         | MDFTS | YADI STI.P | GHVLYWEL KAKY....RNDIVE.....IDKNV     |
| AtGH3-9         | AEYTS | YADTSSV.P  | GHVLFWEI QGH....LEPKLM                |
| AtGH3-10        | VDFTS | HADV IAR.P | GHVLIWEI RGE....ADDKAL                |
| AtGH3-11        | IDFSS | YIDV STD.P | GHYAI FWEI SGE....TNEDVL              |
| AtGH3-12        | KDFTS | YADTSTF.P  | GHVVVYLEV DTKE....GEEKET...AQFELDEEAL |
| AtGH3-13        | MEFTS | RVDSSSF.V  | GHVLYWEL GSKV....KDAKLE....PNRDV      |
| AtGH3-14        | MDFTS | RVDSSSY.P  | GHVLYWEL GRKV....KDAKLE....LDQNV      |
| AtGH3-15        | MDFTS | RVDSSSF.P  | GHVLIYWEL GSKV....KDAKFE....PNRDV     |
| AtGH3-16        | MDFTS | RVDLSSL.P  | GHVLYWEL GNKF....KNAKLD....PKSNV      |
| AtGH3-17        | TEYTS | YADTSSI.P  | GHVLFWEL KPRH....SNDPPK....LDDKT      |
| AtGH3-18        | MGFTC | YADI STF.P | GHVFEYWEL KAKD....VQDVFE....LEEKV     |
| AtGH3-19        | TGFTC | YADI SSF.P | GHVFEYWEL KAKD....VDDVVE....LDENV     |
| BraX.GH3-1.a    | AEYTS | YADTSTI.P  | GHVLYWEL LVR....EGERQ.....PSHDTL      |
| BraX.GH3-2.a    | IEYTS | YADTKTI.P  | GHVLIYWEL.....TNAV....PGDDV           |
| BraA09.GH3-3.a  | IEYTS | YADTKTI.P  | GHVLIYWEL LVK....DQANP....PSDEV       |
| BraA01.GH3-5.a  | SEYTS | YADTSSI.P  | GHVLFWEL CLDGNT                       |
| BraA03.GH3-5.b  | SEYTS | YADTSSI.P  | GHVLFWEL CLDGNT                       |
| BraA02.GH3-6.a  | SEYTS | YADTSSI.P  | GHVLFWEL CLNGNT                       |
| BraA03.GH3-6.b  | SEYTS | YADTSSI.P  | GHVLFWEL CLNGGT                       |
| BraA06.GH3-7.a  | VAFTS | YADI SSS.P | GHVLIWEV KTKE....EDMKE....LDEKTF      |
| BraA08.GH3-7.b  | TDFTS | HGDI STI.P | GHVLIWEV EDKR....EDKTK..HICMELKGD     |
| BraA02.GH3-8.a  | IDFTS | YADV STT.P | GHVLYWEL KGKY....NNDIAE....IDNKV      |
| BraA03.GH3-8.b  | MDFTG | YADI STT.P | GHVLYWEL KGKY....SNDIAK....IDNKV      |
| BraA03.GH3-8.c  | RDFTC | YPHV SDA.P | GHVLYWEL KGNN....DDGISE....IDTNM      |
| BraA03.GH3-8.d  | KDFTC | YPHI STV.P | GHVLYWEL KGNN....NDDINEL....IDTNV     |
| BraA06.GH3-8.e  | TGFTC | YADI STV.P | GHVFEYMEI KAKV.NNTSIDDLV....LDTKV     |
| BraA06.GH3-8.f  | MGFTC | YGDI STV.P | GHVFEYLEI KSKV.DNNTITNVL              |
| BraA09.GH3-8.g  | MGFTS | YADI STL.P | GHYFIYWEL KAKN....ISDIVK....PDNKV     |
| BraA09.GH3-8.h  | TGFTC | FGDV STV.P | GHVFEYLEI KAKV..NNDITNVL              |
| BraA10.GH3-8.i  | MGFTC | YADI STL.P | GHYFIYWEL KSKT....ISDIVK....LDNKV     |
| BraA09.GH3-10.a | VDFTS | HADV KAR.P | GRYIIYWEI RGE....AEDKAL               |
| BraA03.GH3-11.a | IDFSS | HVDV TTE.P | GHVLIWEI SGE....TEDDVL                |
| BraA04.GH3-11.b | IDFSS | HVDV TTE.P | GHVIFWEV SGE....TEGDVL                |
| BraA05.GH3-11.c | IDFSS | HVDL STE.P | GHVIFWEI SGE....TNEDVL                |
| BraA02.GH3-12.a | VDFTS | YADTSTF.P  | GHVLFVEV KAKE....GNNRLE....LNEEAF     |
| BraA03.GH3-12.b | VDFTS | YADTSTF.P  | GHVLIYLEI KEKK....GENKKN....NVELSEEV  |
| BraA06.GH3-12.c | VAFTS | YADTSSS.P  | GHVLIYLEV KAKN....EDIRD....LEFDEKTF   |
| BraA10.GH3-12.d | EDFTS | YADTSTF.P  | GHVLIYVEV KAKG....GNNHLE....LNEEV     |
| BraA10.GH3-14.a | IDFTS | RVDSSSY.P  | GHVLYWEL GSKV....KDKKIE....PERKV      |
| BraA03.GH3-15.a | IDFTS | RVDSSSF.P  | GHVLYWEL GSKV....NDAKLE....PDDEV      |
| BraA07.GH3-15.b | IDFTS | RVDSSSF.P  | GHVLYWEL GCKV....KDVKVE....PDDEV      |
| BraA02.GH3-16.a | IDFTS | RVDSSSF.P  | GHVLIYWEL GRKL....KDAKVE....PHRHV     |
| BraA07.GH3-17.a | TEYTS | YADTSSI.P  | GHVLFWEL KPRY....NNDPPK....LDDKT      |
| BraA09.GH3-17.b | TEYTS | YADTSSI.P  | GHVLFWEL KPRH....NNEPPE....LENKT      |
| BraAX.GH3-17.c  | TEYTS | YADTSSI.P  | GHVLFWEL KPRY....DNDPPK....LDKMM      |
| BraA04.GH3-19.a | MGFTC | KSDM STF.P | GHVFEYWEI KAKK....IDCIVK....LDNNV     |
| BraA06.GH3-19.b | TGFTC | YGDI STV.P | GHVFEYLEI KAKV.NNNSIDDEV....LDNKV     |
| BraA09.GH3-19.c | TGFTC | YGDI STV.P | GHVFEYLEV KAKV..NNGTNVLQ....LDNKV     |
| BraA09.GH3-19.d | TGFTC | YGDI STV.P | GHVFEYVEL IAKV..NNGTNVLQ....LDNKV     |
| BraAX.GH3-19.e  | MDFTS | SADI STF.P | GHVFEYWEL KGKE....VNDVLV....LDEKTL    |
| BolC09.GH3-1.a  | AEYTS | YADTSTI.P  | GHVLYWEL LVR....DGERQ.....PSHDTL      |
| BolC01.GH3-2.a  | IEYTS | YADTKTI.P  | GHVLIYWEL.....TNAV....PGDDV           |
| BolC08.GH3-3.a  | IEYTS | YADTKTI.P  | GHVLIYWEL LVK....DQANP....PSDEV       |
| BolC01.GH3-5.a  | SEYTS | YADTSSI.P  | GHVLFWEL CLDGNT                       |
| BolC07.GH3-5.b  | SEYTS | YADTSSI.P  | GHVLFWEL CLDGNT                       |
| BolC02.GH3-6.a  | SEYTS | YADTSSI.P  | GHVLFWEL YLNGNT                       |
| BolC03.GH3-6.b  | SEYTS | YADTSSI.P  | GHVLFWEL CLNGGT                       |
| BolC06.GH3-7.a  | VDFTS | YADI SSSDP | GHVLIWEV NVKN....EDMKN....LQFYKTF     |
| BolC01.GH3-8.a  | RDFTC | YPHI ADT.P | GHVLYWEL KGNN....YDGISE....LDPDMM     |
| BolC03.GH3-8.b  | MDFTG | YADI STT.P | GHVLYWEL KGKY....SNDIAE....IDDKV      |
| BolC07.GH3-8.c  | RDFTC | YPHV SDV.P | GHVLYWEL KGNN....EDGISE....LNTNM      |
| BolC08.GH3-8.d  | TGFTC | YADI STV.P | GHVFEYLEI KAKV..NSGTNVL               |
| BolC09.GH3-8.e  | MGFTC | YADI STL.P | GDSHEVYT....LSHNLL                    |
| BolC09.GH3-10.a | VDFTS | HADV TAR.P | GRYIIYWEI RGE....AEDKAL               |
| BolC03.GH3-11.a | IDFSS | HVDV STE.P | GHVLIWEI SGE....TEDDVL                |
| BolC04.GH3-11.b | IDFSS | HVDV TTE.P | GHVIFWEI SGE....TEGDVL                |
| BolCX.GH3-11.c  | IDFSS | HVDL STE.P | GHVIFWEI SGE....TNEDVL                |
| BolC03.GH3-12.a | VDFTS | YADTSTF.P  | GHVLIYLEI KEKE....GENKKN....NVELSEEV  |
| BolC09.GH3-12.b | EDFTS | YADTSTF.P  | GHVLIYVEV RAKE....GKKYLELNKEALDNKEAF  |
| BolC09.GH3-14.a | IDFTS | RVDSSSY.P  | GHVLYWEL GSKV....KDKKLE....PKREV      |
| BolC03.GH3-15.a | IDFTS | RVDSSSF.P  | GHVLYWEL GSKV....KDAKLE....PDDEV      |
| BolCX.GH3-16.a  | IDFTS | RVDSSSF.P  | GHVLIYWEL GRKL....KDAKVE....PHRHV     |
| BolC07.GH3-17.a | TEYTS | YADTSSI.P  | GHVLFWEL KPRY....NNDPPK....LDDKT      |
| BolC08.GH3-17.b | TEYTS | YADTSSI.P  | GHVLFWEL KPRY....DNDPPM....LDKMM      |
| BolC08.GH3-19.a | TGFTC | YGDI STV.P | GHVFEYVEL KAKV..KNGTNVLQ....LDNKV     |
| BnaA09R.GH3-1.a | AEYTS | YADTSTI.P  | GHVLYWEL LVR....DGERQ.....PSHDTL      |
| BnaCX.GH3-1.a   | AEYTS | YADTSTI.P  | GHVLYWEL LVR....DGERQ.....PSHDTL      |
| BnaA01.GH3-2.a  | IEYTS | YADTKTI.P  | GHVLIYWEL.....TNAV....PGDDV           |
| BnaC01.GH3-2.a  | IEYTS | YADTKTI.P  | GHVLIYWEL.....TNAV....PGDDV           |
| BnaA09.GH3-3.a  | IEYTS | YADTKTI.P  | GHVLIYWEL LVK....DQANP....PSDEV       |
| BnaC08.GH3-3.a  | IEYTS | YADTKTI.P  | GHVLIYWEL LVK....DQANP....PSDEV       |
| BnaA01.GH3-5.a  | SEYTS | YADTSSI.P  | GHVLFWEL CLDGNT                       |
| BnaA03.GH3-5.b  | SEYTS | YADTSSI.P  | GHVLFWEL CLDGNT                       |
| BnaC01.GH3-5.a  | SEYTS | YADTSSI.P  | GHVLFWEL CLDGNT                       |
| BnaC07.GH3-5.b  | SEYTS | YADTSSI.P  | GHVLFWEL CLDGNT                       |
| BnaA03.GH3-6.a  | SEYTS | YADTSSI.P  | GHVLFWEL CLNGDT                       |
| BnaAX.GH3-6.b   | SEYTS | YADTSSI.P  | GHVLFWEL CLNGNT                       |
| BnaC03.GH3-6.a  | SEYTS | YADTSSI.P  | GHVLFWEL CLNGGT                       |
| BnaCX.GH3-6.b   | SEYTS | YADTSSI.P  | GHVLFWEL YLNGNT                       |
| BnaA06.GH3-7.a  | VAFTS | YADI SSS.P | GHVLIWEV KTKE....EDMKE....LDEKTS      |
| BnaA08.GH3-7.b  | TDFTS | HGDI STI.P | GHVLIWEV EDKR....EDKTK..HICMELKGD     |
| BnaC06.GH3-7.a  | VDFTS | YADI SSSDP | GHVLIWEV NVKN....EDMKN....LQFYKTF     |
| BnaA03.GH3-8.a  | MDFTG | YADI STT.P | GHVLYWEL KGKY....SNDIAK....IDDKV      |
| BnaA03.GH3-8.b  | RDFTC | YPHV SDA.P | GHVLYWEL KGNN....DDGISE....IDTNM      |
| BnaA03.GH3-8.c  | KDFTC | YPHI STV.P | GHVLYWEL KGNI....NDDINEL....IDTNV     |
| BnaA06.GH3-8.d  | TGFTC | YADI STV.P | GHVFEYMEI KAKV.NNTSIDDLV....LDTKV     |

[illegible]



|                 | 500    | 510      | 520           | 530          | 540        |             |           |
|-----------------|--------|----------|---------------|--------------|------------|-------------|-----------|
| AtGH3-1         | TRCC   | LGMEESL  | NSVYRQSRVADN  | SVG          | PLEIRVVVRN | GTFFELMD    |           |
| AtGH3-2         | AKCC   | LEMEESL  | NSVYRQSRVADK  | SIG          | PLEIRVVVRN | GTFFELMD    |           |
| AtGH3-3         | ARCC   | LEMEESL  | NSVYRQSRVADK  | SIG          | PLEIRVVVRN | GTFFELMD    |           |
| AtGH3-4         | AKCC   | LEMEESL  | NAVYRQSRVADK  | SIG          | PLEIRVVVRN | GTFFELMD    |           |
| AtGH3-5         | EDCC   | LAVEESF  | NTVYRQGRVSDK  | SIG          | PLEIKIVVP  | GTFFDKLMD   |           |
| AtGH3-6         | EDCC   | LTIEESL  | NSVYRQGRVSDK  | SIG          | PLEIKMVES  | GTFFDKLMD   |           |
| AtGH3-7         | SECC   | LLMEDSL  | DSVYKICRFKEE  | SVG          | PLEIKVVRQ  | GTFFDKLMD   |           |
| AtGH3-8         | VECC   | YVVEESL  | NNSYRVYRSKGL  | LIG          | ALAIRLVQQ  | GTFFDALME   |           |
| AtGH3-9         | EECC   | VAVEEEL  | DYIYRQCRTER   | SIG          | ALAIRVVVKP | GTFFDKLMD   |           |
| AtGH3-10        | EECC   | REMDTAF  | VDYGYVVSRR    | RMNSIG       | PLELRVVVER | GTFFGKVAE   |           |
| AtGH3-11        | QDCC   | NCLDRAF  | IDAGYVSSR     | KCKTIG       | ALAIRVVVAK | GTFFRKIQE   |           |
| AtGH3-12        | STCC   | CLVMEESL | DNVYKRCRFKDG  | GSIG         | PLEIRVVVRQ | GTFFDKLMD   |           |
| AtGH3-13        | EECC   | FTVEKYL  | DPLYRQERKDK   | NIG          | PLEIKVVVKP | GAFFDELNM   |           |
| AtGH3-14        | EECC   | FTIEESL  | DAVYRKGRKNDK  | NIG          | PLEIKVVVKP | GAFFDKLMN   |           |
| AtGH3-15        | EECC   | FTVEESL  | DAVYRKGRKNDK  | NIG          | PLEIKVVVKP | GAFFDELNM   |           |
| AtGH3-16        | EECC   | LTVEESL  | DSIYREGRKNDK  | LIG          | PLEIKVVVKP | GAFFDELNM   |           |
| AtGH3-17        | EDCC   | SEVEDCL  | DYVYRRCRNKDK  | SIG          | PLEIRVVVSL | GTFFDKLMD   |           |
| AtGH3-18        | VKCC   | SLLEESF  | DEVYRKNSKDE   | CIG          | PLEIRVVVQ  | GTFFDSLME   |           |
| AtGH3-19        | EECC   | YALEESF  | DALYKRLRSKEG  | SIG          | ALAIRVVVQ  | GTFFDSLME   |           |
| BraX_GH3-1.a    | TRCC   | LEMEESL  | NSVYRQSRVADN  | SVG          | PLEIRVVVRN | GTFFELMD    |           |
| BraX_GH3-2.a    | AKCC   | LEMEESL  | NSVYRQSRVADK  | SIG          | PLEIRVVVRN | GTFFELMD    |           |
| BraA09_GH3-3.a  | AKCC   | LEMEESL  | NSVYRQSRVADK  | SIG          | PLEIRVVVRN | GTFFELMD    |           |
| BraA01_GH3-5.a  | EDCC   | LALAEESL | NTVYRQGRVSDK  | SIG          | PLEIKIVVP  | GTFFDKLMD   |           |
| BraA03_GH3-5.b  | EDCC   | LAVEESF  | NSVYRQGRVSDK  | SIG          | PLEIKIVVP  | GTFFDKLMD   |           |
| BraA02_GH3-6.a  | EDCC   | LTIEESF  | NSVYRQGRVSDK  | SIG          | PLEIKVVES  | GTFFDKLMD   |           |
| BraA03_GH3-6.b  | EDCC   | LTIEESL  | NSVYRQGRVSDK  | SIG          | PLEIKVVES  | GTFFDKLMD   |           |
| BraA06_GH3-7.a  | LECC   | SVMEDTL  | DEEYMYCR      | ANEFIG       | PLEIRVVND  | GTFFDSLNM   |           |
| BraA08_GH3-7.b  | SECC   | LVMEDSF  | DNVYKRCRFREK  | TVG          | PLEIKVVVH  | GTFFDSLMD   |           |
| BraA02_GH3-8.a  | VECC   | YVVEESL  | NNFYKEFRSKDG  | SIG          | ALAIRVVVQ  | GTFFDSLME   |           |
| BraA03_GH3-8.b  | VECC   | YVVEESL  | DNFYKEYR      | KNGSIG       | ALAIRVVVQ  | GTFFDSLME   |           |
| BraA03_GH3-8.c  | VECC   | SVVEESL  | GALYKRYRSKER  | SIG          | ALAIRVVVQ  | GTFFDALME   |           |
| BraA03_GH3-8.d  | MECC   | SVVEESL  | DALYKFRSKDE   | SIG          | ALAIRVVVQ  | GTFFDSLME   |           |
| BraA06_GH3-8.e  | VECC   | CVMEESL  | NGSYRSFRKNGW  | IG           | ALAIRVVVQ  | GTFFASLMD   |           |
| BraA06_GH3-8.f  | VECC   | CVIEESL  | NRIYRHFRRSK   | EGSIG        | ALAIRVVVQ  | GTFFGSLMD   |           |
| BraA09_GH3-8.g  | VECC   | CVMEESL  | SALYREIRSKDG  | GSIG         | PLEIRIVVQ  | GTFFNSLME   |           |
| BraA09_GH3-8.h  | VEYCC  | CVMEESL  | SSFYRSLRCKDG  | PIG          | PLEVRVVQ   | GTFFDSLME   |           |
| BraA10_GH3-8.i  | VECC   | CVMEESL  | CALYREIRLSDNG | GSIG         | ALAIRVVVQ  | GTFFNSLME   |           |
| BraA09_GH3-10.a | EDCC   | REMDAGF  | VDHGYVVSRR    | RMKSIG       | PLELRVVGR  | GTFFGKVAE   |           |
| BraA03_GH3-11.a | QDCC   | NCLDKGF  | IDAGYMSSR     | KCKTIG       | ALAIRVVVER | GTFFRKVQE   |           |
| BraA04_GH3-11.b | QDCC   | NCLDKGF  | IDAGYMSSR     | KCKTIG       | ALAIRVVVER | GTFFRKVQE   |           |
| BraA05_GH3-11.c | QDCC   | NCLDKGF  | IDAGYMSSR     | KCKTIG       | ALAIRVLEK  | GTFFKKIQE   |           |
| BraA02_GH3-12.a | SKCC   | SVIEDSL  | DNVYKRCRFKDG  | GSVG         | PLEIRVVVQ  | GTFFDSLMD   |           |
| BraA03_GH3-12.b | SKCC   | SVMEDSL  | DNVYKRCRFKDG  | GSVG         | PLEIRVVVRQ | GMFFDSLMD   |           |
| BraA06_GH3-12.c | LECC   | LVMEDSF  | DDEYRYCR      | SNEFVG       | PLEIRVVND  | GSFFSLMN    |           |
| BraA10_GH3-12.d | SKCC   | SVMEDSL  | DNVYKRCRFKDG  | GSVG         | PLEIRVVVKP | GTFFESLMD   |           |
| BraA10_GH3-14.a | EECC   | FTVEESL  | DSVYRKGRKNDK  | NIG          | PLEIKVVVR  | GAFFDELMS   |           |
| BraA03_GH3-15.a | EECC   | FTMEESL  | DSIYRKGRKNDK  | NIG          | PLEIKVVKS  | GAFFDELNM   |           |
| BraA07_GH3-15.b | EECC   | FAVEECL  | FAVEECL       | DSVYRNGRRNDK | NIG        | PLEIKVVRS   | GAFFDELMS |
| BraA02_GH3-16.a | EECC   | FTIEKSL  | NSVYRKLKNDG   | TVG          | PLEIKVVVR  | GAFFDELNM   |           |
| BraA07_GH3-17.a | EKCC   | SEVEDRL  | DYVYRRCRNKDK  | SIG          | PLEIRVVVSL | GTFFDLMD    |           |
| BraA09_GH3-17.b | ELCC   | SEVEDYL  | DYVYRRCRNKDK  | SIG          | PLEIRVVVSL | GTFFDLMD    |           |
| BraAX_GH3-17.c  | EDCC   | SEVEDCL  | DYVYRRCRNKDR  | SIG          | ALAIRVVVSL | GTFFDALMD   |           |
| BraA04_GH3-19.a | VKCC   | CVMEESF  | NALYRHRKRYG   | TIG          | PLEIRVMQ   | GTFFDSLME   |           |
| BraA06_GH3-19.b | VECC   | RVMEESL  | NGTYRFRKNG    | GSIG         | ALAIRVVVQ  | GTFFDSLMD   |           |
| BraA09_GH3-19.c | VECC   | CIIEESL  | SSLYRRLRGDE   | GSIG         | ALAIRVVVQ  | GTFFDSLME   |           |
| BraA09_GH3-19.d | VEYCC  | CVMEESL  | SSLYRRLRVKDG  | PIG          | PLEVRVVE   | GTFFDSLME   |           |
| BraAX_GH3-19.e  | MGCC   | YVLEESF  | GSTYRLKR      | RTGLIG       | ALAIRVVVEQ | GTFFNSLTD   |           |
| BolC09_GH3-1.a  | TRCC   | LEMEESL  | NSVYRQSRVADN  | SVG          | PLEIRVVVRN | GTFFELMD    |           |
| BolC01_GH3-2.a  | AKCC   | LEMEESL  | NSVYRQSRVADK  | SIG          | PLEIRVVVRN | GTFFELMD    |           |
| BolC08_GH3-3.a  | AKCC   | LEMEESL  | NSVYRQSRVADN  | SIG          | PLEIRVVVRN | GTFFELMD    |           |
| BolC01_GH3-5.a  | EDCC   | LALAEESL | NTVYRQGRVSDK  | SIG          | PLEIKIVG   | GTFFDKLMD   |           |
| BolC07_GH3-5.b  | EDCC   | LAVEESF  | NSVYRQGRVSDK  | SIG          | PLEIKIVVP  | GTFFDKLMD   |           |
| BolC02_GH3-6.a  | EDCC   | LTIEESF  | NSVYRQGRVSDK  | SIG          | PLEIKVVES  | GTFFDKLMD   |           |
| BolC03_GH3-6.b  | EDCC   | LTIEESL  | NSVYRQGRVSDK  | SIG          | PLEIKVVES  | GTFFDKLMD   |           |
| BolC06_GH3-7.a  | LECC   | SVMEDSF  | DDEYRYCR      | SNEFVG       | PLEIRVVND  | GTFFSLMN    |           |
| BolC01_GH3-8.a  | VECC   | SVIEESL  | NALYKFRSK     | KEKTIG       | ALAIRVVQ   | GTFFDSLME   |           |
| BolC03_GH3-8.b  | V      |          |               |              |            |             |           |
| BolC07_GH3-8.c  | VECC   | SVVEESL  | GALYKRYRSKEG  | GSIG         | PLEIRVVVQ  | GSFFDALME   |           |
| BolC08_GH3-8.d  | VEYCC  | CVMEESL  | SSSYRTLRRQD   | GLIG         | ALAIRVIVQ  | KEFTFFDSLME |           |
| BolC09_GH3-8.e  | LAHAAE | AV       | EEFRKCAKCKD   | GNIG         | IVRSPMWFEP | YEKSSSE     |           |
| BolC09_GH3-10.a | EDCC   | REMDAGF  | VDHGYVVSRR    | RMKSIG       | PLELRVVVER | GTFFGVAE    |           |
| BolC03_GH3-11.a | QDCC   | NCLDKGF  | IDAGYMSSR     | KCKTIG       | ALAIRVVVER | GTFFRKVQE   |           |
| BolC04_GH3-11.b | QDCC   | NCLDKGF  | IDAGYMSSR     | KCKTIG       | ALAIRVVVER | GTFFRKVQE   |           |
| BolCX_GH3-11.c  | QDCC   | NCLDKGF  | IDAGYMSSR     | KCKTIG       | ALAIRVLEK  | GTFFKKIQE   |           |
| BolC03_GH3-12.a | PKCC   | SVMEDSL  | DNVYKRCRFKDG  | GSVG         | PLEIRVVVRQ | GMFFDSLMD   |           |
| BolC09_GH3-12.b | SKCC   | SVMEDSL  | DNVYKRCRFKDG  | GSVG         | PLEIRVVVKP | GTFFDSLNM   |           |
| BolC09_GH3-14.a | EECC   | FTVEESL  | DSVYRKGRKNDK  | NIG          | PLEIKVVVR  | GAFFDELNM   |           |
| BolC03_GH3-15.a | EECC   | FTMEESL  | DSIYRKGRKNDK  | NIG          | PLEIKVVKS  | GAFFDELNM   |           |
| BolCX_GH3-16.a  | EECC   | FTIEKSL  | NSVYRKLKNDG   | TVG          | PLEIKVVVR  | GAFFDELNM   |           |
| BolC07_GH3-17.a | EKCC   | SEVEDRL  | DYVYRRCRNKDK  | SIG          | PLEIRVVVSL | GTFFDLMD    |           |
| BolC08_GH3-17.b | EDCC   | SEVEDCL  | DYVYRRCRNKDK  | GSIG         | ALAIRVVVSL | GTFFDALMD   |           |
| BolC08_GH3-19.a | VEYCC  | CVMEESL  | SGIYRRLRGDE   | GSIG         | PLEVRIVVQ  | GTFFDSLME   |           |
| BnaA09R_GH3-1.a | TRCC   | LEMEESL  | NSVYRQSRVADN  | SVG          | PLEIRVVVRN | GTFFELMD    |           |
| BnaCX_GH3-1.a   | TRCC   | LEMEESL  | NSVYRQSRVADN  | SVG          | PLEIRVVVRN | GTFFELMD    |           |
| BnaA01_GH3-2.a  | AKCC   | LEMEESL  | NSVYRQSRVADK  | SIG          | PLEIRVVVRN | GTFFELMD    |           |
| BnaC01_GH3-2.a  | AKCC   | LEMEESL  | NSVYRQSRVADK  | SIG          | PLEIRVVVRN | GTFFELMD    |           |
| BnaA09_GH3-3.a  | AKCC   | LEMEESL  | NSVYRQSRVADK  | SIG          | PLEIRVVVRN | GTFFELMD    |           |
| BnaC08_GH3-3.a  | AKCC   | LEMEESL  | NSVYRQSRVADK  | SIG          | PLEIRVVVRN | GTFFELMD    |           |
| BnaA01_GH3-5.a  | EDCC   | LALAEESL | NTVYRQGRVSDK  | SIG          | PLEIKIVVP  | GTFFDKLMD   |           |
| BnaA03_GH3-5.b  | EDCC   | LAVEESF  | NSVYRQGRVSDK  | SIG          | PLEIKIVVP  | GTFFDKLMD   |           |
| BnaC01_GH3-5.a  | EDCC   | LALAEESL | NTVYRQGRVSDK  | SIG          | PLEIKIVVP  | GTFFDKLMD   |           |
| BnaC07_GH3-5.b  | EDCC   | LAVEESF  | NSVYRQGRVSDK  | SIG          | PLEIKIVVP  | GTFFDKLMD   |           |
| BnaA03_GH3-6.a  | EDCC   | LTIEESL  | NSVYRQGRVSDK  | SIG          | PLEIKVVES  | GTFFDKLMD   |           |
| BnaAX_GH3-6.b   | EDCC   | LTIEESF  | NSVYRQGRVSDK  | SIG          | PLEIKVVES  | GTFFDKLMD   |           |
| BnaC03_GH3-6.a  | EDCC   | LTIEESL  | NSVYRQGRVSDK  | SIG          | PLEIKVVES  | GTFFDKLMD   |           |
| BnaCX_GH3-6.b   | EDCC   | LTIEESF  | NSVYRQGRVSDK  | SIG          | PLEIKVVES  | GTFFDKLMD   |           |
| BnaA06_GH3-7.a  | LECC   | SVMEDTL  | DEEYMYCR      | ANEFIG       | PLEIRVVND  | GTFFDSLNM   |           |
| BnaA08_GH3-7.b  | SECC   | LVMEDSF  | DNVYKRCRFREK  | TVG          | PLEIKVVVH  | GTFFDKLMD   |           |
| BnaC06_GH3-7.a  | LECC   | SVMEDSF  | DDEYRYCR      | SNEFVG       | PLEIRVVND  | GTFFDSLNM   |           |
| BnaA03_GH3-8.a  | VECC   | CVMEESL  | NGSYRSFRKNGW  | IG           | ALAIRVVVQ  | GTFFDSLME   |           |
| BnaA03_GH3-8.b  | VDCC   | CVVEESL  | GALYKRYRSKER  | SIG          | ALAIRVVVQ  | GTFFDALME   |           |
| BnaA03_GH3-8.c  | MECC   | SVVEESL  | DALYKFRSKDE   | SIG          | ALAIRVVVQ  | GTFFDSLME   |           |
| BnaA06_GH3-8.d  | VECC   | CVMEESL  | NGSYRSFRKNGW  | IG           | ALAIRVVVQ  | GTFFDSLME   |           |

[illegible]

|                 | 550 |      |      |      | 560 |     |   |      | 570 |     |     |      |
|-----------------|-----|------|------|------|-----|-----|---|------|-----|-----|-----|------|
| AtGH3-1         | YAI | SRGA | SINQ | YKVP | PRC | VN  | F | TP   | IVE | LLD | SR  |      |
| AtGH3-2         | YAI | SRGA | SINQ | YKVP | PRC | VS  | F | TP   | IME | LLD | SR  |      |
| AtGH3-3         | YAI | SRGA | SINQ | YKVP | PRC | VS  | F | TP   | IME | LLD | SR  |      |
| AtGH3-4         | FST | SRGS | SINQ | YKVP | PRC | VS  | L | TP   | IMK | LLD | SR  |      |
| AtGH3-5         | YAI | SLGA | SINQ | YKTP | PRC | VK  | F | API  | IE  | LLN | SR  |      |
| AtGH3-6         | YAI | SLGA | SINQ | YKTP | PRC | VK  | F | API  | IE  | LLN | SR  |      |
| AtGH3-7         | YFI | SQGA | SIGQ | YKTP | PRC | IK  | S | GK   | AL  | VLE | EN  |      |
| AtGH3-8         | FFI | TQGA | SSTQ | YKTP | IC  | IK  | S | TE   | AL  | VLE | EN  |      |
| AtGH3-9         | LIT | SQGG | SENG | YKTP | PRC | VK  | S | NSA  | T   | FK  | LLN | GH   |
| AtGH3-10        | RCV | GKCG | GLNQ | FKTP | PRC | T   |   | TNSV | M   | L   | D   | ILN  |
| AtGH3-11        | HFL | GLGS | SAGQ | FKMP | PRC | VKP | S | NAK  | V   | L   | Q   | ILC  |
| AtGH3-12        | FFI | SQGA | SIGQ | YKTP | PRC | IK  | S | GK   | AL  | Q   | VLE | TC   |
| AtGH3-13        | FFI | SRGS | SVSQ | YKTP | PRS | VK  | T | EE   | AV  | K   | I   | LE   |
| AtGH3-14        | FFI | SRGS | SVSQ | YKTP | PRS | VT  | N | EE   | AL  | K   | I   | LE   |
| AtGH3-15        | FFI | SRGS | SVSQ | YKTP | PRS | VT  | N | EE   | AL  | K   | I   | LE   |
| AtGH3-16        | FFI | SRGS | SVSQ | YKTP | PRS | VT  | H | EE   | AL  | N   | I   | LE   |
| AtGH3-17        | FCV | SQGS | SINQ | YKTP | PRC | VK  | S | GG   | AL  | E   | I   | LD   |
| AtGH3-18        | YFI | SQGG | SIAQ | YKTP | IC  | IN  | S | SE   | AL  | A   | VLE | NK   |
| AtGH3-19        | YFI | SKGG | SVAQ | YKTP | PMC | IN  | S | SE   | T   | L   | A   | VLE  |
| BraX.GH3-1.a    | YAI | SRGA | SINQ | YKVP | PRC | VN  | F | TP   | IVE | LLD | SR  |      |
| BraX.GH3-2.a    | YAI | SRGA | SINQ | YKVP | PRC | VS  | F | TP   | IME | LLD | SR  |      |
| BraA09.GH3-3.a  | YAI | SRGA | SINQ | YKVP | PRC | VS  | F | TP   | IME | LLD | SR  |      |
| BraA01.GH3-5.a  | YAI | SLGA | SINQ | YKTP | PRC | VK  | F | API  | IE  | LLN | SR  |      |
| BraA03.GH3-5.b  | YAI | SLGA | SINQ | YKTP | PRC | VK  | F | API  | IE  | LLN | SR  |      |
| BraA02.GH3-6.a  | YAI | SLGA | SINQ | YKTP | PRC | VK  | F | API  | IE  | LLN | SR  |      |
| BraA03.GH3-6.b  | YAI | SLGA | SINQ | YKTP | PRC | VK  | F | API  | IE  | LLN | SR  |      |
| BraA06.GH3-7.a  | LSI | SKGA | SITQ | YKTP | TC  | IT  | S | EE   | G   | L   | Q   | VLE  |
| BraA08.GH3-7.b  | FFI | SQGA | SIGQ | YKTP | PRC | IG  | S | GK   | P   | L   | E   | LLE  |
| BraA02.GH3-8.a  | FFI | TQGA | SSTQ | YKTP | IC  | IK  | S | SE   | AL  | A   | I   | LE   |
| BraA03.GH3-8.b  | FFI | SQGA | SSTQ | YKTP | IC  | IK  | S | TE   | A   | I   | A   | I    |
| BraA03.GH3-8.c  | YFI | SQGA | SIAQ | YKTP | PRC | IK  | S | SE   | AL  | Q   | VLE | NR   |
| BraA03.GH3-8.d  | YFI | AQGA | SIGQ | YKTP | PRC | IK  | S | SA   | AL  | E   | L   | RP   |
| BraA06.GH3-8.e  | FFV | CRGS | SISQ | YKTP | PMC | LE  | S | AE   | AL  | K   | VLE | DK   |
| BraA06.GH3-8.f  | FFV | SRGC | SITQ | YKTP | IC  | LN  | S | AE   | AL  | K   | VLE | DK   |
| BraA09.GH3-8.g  | FST | SQGA | SPSQ | YKTP | PMC | IK  | S | SE   | AL  | V   | VLD | NN   |
| BraA09.GH3-8.h  | FFV | SRGA | SITQ | YKTP | IC  | IN  | S | VE   | AS  | R   | VLE | DK   |
| BraA10.GH3-8.i  | LAI | SQGA | SPSQ | YKTP | IC  | IN  | S | SE   | AS  | A   | VLE | SN   |
| BraA09.GH3-10.a | RCV | GKCG | GLNQ | FKTP | PRC | T   |   | TNSV | M   | L   | D   | ILN  |
| BraA03.GH3-11.a | HFL | GLGS | SAGQ | FKMP | PRC | VKP | S | NAK  | V   | L   | Q   | ILC  |
| BraA04.GH3-11.b | HFL | GLGS | SAGQ | FKMP | PRC | VKP | S | NAK  | V   | L   | Q   | ILC  |
| BraA05.GH3-11.c | HFL | GLGS | SAGQ | FKMP | PRC | VKP | S | NAK  | V   | L   | Q   | ILC  |
| BraA02.GH3-12.a | FFI | KQGA | SIGQ | YKTP | PRC | IK  | S | GK   | AL  | E   | F   | MEDY |
| BraA03.GH3-12.b | FFI | SQGA | SIGQ | YKTP | PRC | IK  | S | VK   | AL  | E   | F   | MEDY |
| BraA06.GH3-12.c | LSI | SKGT | SVNQ | YKTP | TC  | IT  | S | EK   | G   | V   | Q   | VLE  |
| BraA10.GH3-12.d | FFI | NQGA | SIGQ | YKTP | PRC | IK  | S | GK   | AL  | E   | L   | ME   |
| BraA10.GH3-14.a | FFV | SRGT | SVSQ | YKTP | PRS | VK  | N | EE   | AL  | K   | I   | LE   |
| BraA03.GH3-15.a | FFV | SRGS | SVSQ | YKTP | PRS | VT  | N | EE   | AL  | K   | VLE | AS   |
| BraA07.GH3-15.b | FFV | SRGS | SVSQ | YKTP | PRS | LT  | N | EE   | AL  | K   | I   | LE   |
| BraA02.GH3-16.a | LFL | SRGS | SVSQ | YKTP | PRS | VT  | S | EE   | AM  | K   | I   | LE   |
| BraA07.GH3-17.a | FCV | SQGS | SVNQ | YKTP | PRC | VK  | S | GG   | AL  | E   | I   | LD   |
| BraA09.GH3-17.b | FCV | SQGS | SVNQ | YKTP | PRC | VK  | P | GG   | AL  | E   | I   | LD   |
| BraAX.GH3-17.c  | FST | SQGS | SVNQ | YKTP | PRC | VK  | S | GG   | AL  | Q   | I   | LD   |
| BraA04.GH3-19.a | YFI | SQGA | FAHQ | YKTP | PLC |     |   |      |     |     |     | K    |
| BraA06.GH3-19.b | FFV | SRGS | SISQ | YKTP | PMC | IN  | S | AE   | AL  | K   | VLE | DK   |
| BraA09.GH3-19.c | FFI | SRGS | SISQ | YKTP | IC  | IK  | S | TE   | AL  | K   | LLE | DK   |
| BraA09.GH3-19.d | FFV | TRGA | SITQ | YKTP | IC  | IN  | S | VE   | AL  | K   | VLE | DK   |
| BraAX.GH3-19.e  | YFI | SRGS | SRAQ | YKTP | PLC | IN  | S | SE   | AS  | A   | VLE | NK   |
| BolC09.GH3-1.a  | YAI | SRGA | SINQ | YKVP | PRC | VN  | F | TP   | IVE | LLD | SR  |      |
| BolC01.GH3-2.a  | YAI | SRGA | SINQ | YKVP | PRC | VS  | F | TP   | IME | LLD | SR  |      |
| BolC08.GH3-3.a  | YAI | SRGA | SINQ | YKVP | PRC | VT  | F | TP   | IME | LLD | SR  |      |
| BolC01.GH3-5.a  | YAI | SLGA | SINQ | YKTP | PRC | VK  | F | API  | IE  | LLN | SR  |      |
| BolC07.GH3-5.b  | YAI | SLGA | SINQ | YKTP | PRC | VK  | F | API  | IE  | LLN | SR  |      |
| BolC02.GH3-6.a  | YAI | SLGA | SINQ | YKTP | PRC | VK  | F | API  | IE  | LLN | SR  |      |
| BolC03.GH3-6.b  | YAI | SLGA | SINQ | YKTP | PRC | VK  | F | API  | IE  | LLN | SR  |      |
| BolC06.GH3-7.a  | FST | SKGT | SITQ | YKTP | TC  | IT  | S | EE   | G   | L   | Q   | VLE  |
| BolC01.GH3-8.a  | YFI | AQGA | TITQ | YKTP | PRC | IK  | S | PE   | AL  | Q   | VLE | SKS  |
| BolC03.GH3-8.b  |     |      |      |      |     |     |   |      |     |     |     | GK   |
| BolC07.GH3-8.c  | YFI | SQGA | SIAQ | YKTP | PRC | IK  | S | SE   | AL  | Q   | VLE | NR   |
| BolC08.GH3-8.d  | FFV | SRGA | SITQ | YKTP | IC  | IN  | S | VE   | AL  | K   | VLE | DK   |
| BolC09.GH3-8.e  | FFI | GCTK | SRVQ | DWFS | G   | EKD | V | LQD  | A   | L   | S   | DSN  |
| BolC09.GH3-10.a | RCV | GKCG | GLNQ | FKTP | PRC | T   |   | TNSV | M   | L   | D   | ILN  |
| BolC03.GH3-11.a | HFL | GLGS | SAGQ | FKMP | PRC | VKP | S | NAK  | V   | L   | Q   | ILC  |
| BolC04.GH3-11.b | HFL | GLGS | SAGQ | FKMP | PRC | VKP | S | NAK  | V   | L   | Q   | ILC  |
| BolCX.GH3-11.c  | HFL | GLGS | SAGQ | FKMP | PRC | VKP | S | NAK  | V   | L   | Q   | ILC  |
| BolC03.GH3-12.a | FFI | SQGA | SIGQ | YKTP | PRC | IK  | S | VK   | AL  | E   | F   | MEDY |
| BolC09.GH3-12.b | FFI | NQGA | SIGQ | YKTP | PRC | IK  | S | GK   | AL  | E   | L   | ME   |
| BolC09.GH3-14.a | FFV | SRGT | SVSQ | YKTP | PRS | VK  | N | EE   | AL  | K   | I   | LE   |
| BolC03.GH3-15.a | FFV | SRGS | SVSQ | YKTP | PRS | VT  | D | EE   | AV  | K   | VLE | AS   |
| BolCX.GH3-16.a  | LFL | SRGS | SVSQ | YKTP | PRS | VT  | S | EE   | AM  | K   | I   | LE   |
| BolC07.GH3-17.a | FCV | SQGS | SVNQ | YKTP | PRC | VK  | S | GG   | AL  | E   | I   | LD   |
| BolC08.GH3-17.b | FST | SQGS | SVNQ | YKTP | PRC | VK  | S | GG   | AL  | Q   | I   | LD   |
| BolC08.GH3-19.a | FFV | SQGS | SISQ | YKTP | IC  | IK  | S | TE   | AL  | K   | VLD | DK   |
| BnaA09R.GH3-1.a | YAI | SRGA | SINQ | YKVP | PRC | VN  | F | TP   | IVE | LLD | SR  |      |
| BnaCX.GH3-1.a   | YAI | SRGA | SINQ | YKVP | PRC | VN  | F | TP   | IVE | LLD | SR  |      |
| BnaA01.GH3-2.a  | YAI | SRGA | SINQ | YKVP | PRC | VS  | F | TP   | IME | LLD | SR  |      |
| BnaC01.GH3-2.a  | YAI | SRGA | SINQ | YKVP | PRC | VS  | F | TP   | IME | LLD | SR  |      |
| BnaA09.GH3-3.a  | YAI | SRGA | SINQ | YKVP | PRC | VS  | F | TP   | IME | LLD | SR  |      |
| BnaC08.GH3-3.a  | YAI | SRGA | SINQ | YKVP | PRC | VS  | F | TP   | IME | LLD | SR  |      |
| BnaA01.GH3-5.a  | YAI | SLGA | SINQ | YKTP | PRC | VK  | F | API  | IE  | LLN | SR  |      |
| BnaA03.GH3-5.b  | YAI | SLGA | SINQ | YKTP | PRC | VK  | F | API  | IE  | LLN | SR  |      |
| BnaC01.GH3-5.a  | YAI | OLGA | SINQ | YKTP | PRC | VK  | F | API  | IE  | LLN | SR  |      |
| BnaC07.GH3-5.b  | YAI | SLGA | SINQ | YKTP | PRC | VK  | F | API  | IE  | LLN | SR  |      |
| BnaA03.GH3-6.a  | YAI | SLGA | SINQ | YKTP | PRC | VK  | F | API  | IE  | LLN | SR  |      |
| BnaAX.GH3-6.b   | YAI | SLGA | SINQ | YKTP | PRC | VK  | F | API  | IE  | LLN | SR  |      |
| BnaC03.GH3-6.a  | YAI | SLGA | SINQ | YKTP | PRC | VK  | F | API  | IE  | LLN | SR  |      |
| BnaCX.GH3-6.b   | YAI | SLGA | SINQ | YKTP | PRC | VK  | F | API  | IE  | LLN | SR  |      |
| BnaA06.GH3-7.a  | LSI | SKGA | SITQ | YKTP | TC  | IT  | S | EE   | G   | L   | Q   | VLE  |
| BnaA08.GH3-7.b  | FFI | SQGA | SIGQ | YKTP | PRC | IG  | S | GK   | P   | L   | E   | LLE  |
| BnaC06.GH3-7.a  | LSI | SKGT | SITQ | YKTP | TC  | IT  | S | EE   | G   | L   | Q   | VLE  |
| BnaA03.GH3-8.a  | FFI | SQGA | SSTQ | YKTP | IC  | IK  | S | TE   | A   | I   | A   | I    |
| BnaA03.GH3-8.b  | YFI | SQGA | SIAQ | YKTP | PRC | IK  | S | SE   | AL  | Q   | VLE | NR   |
| BnaA03.GH3-8.c  | YFI | AQGA | SIAQ | YKTP | PRC | IK  | S | SK   | AL  | E   | VLE | NR   |
| BnaA06.GH3-8.d  | FFV | SRGS | SISQ | YKTP | PMC | LE  | S | AE   | AL  | K   | VLE | DK   |

|                  |             |      |        |         |         |                       |
|------------------|-------------|------|--------|---------|---------|-----------------------|
| BnaA06.GH3-8.e   | FFV.SRGC    | SITQ | YKTPIC | TS.S.AE | ALKVLE  | DK                    |
| BnaA09.GH3-8.f   | FFFL.SRLK   | FVFV | HLLACC | GLDTK   | LD.T.IS | SPS                   |
| BnaA09.GH3-8.g   | YYVV.SRGS   | SISQ | YKTPIC | IN.S.AE | ALEVLE  | EK                    |
| BnaAX.GH3-8.h    | FFI.TQGA    | SSTQ | YKTPIC | IK.S.SE | ALAILE  | EK                    |
| BnaAX.GH3-8.i    | FFV.SRGA    | SITQ | YKTPIC | IN.S.VE | ALKVLE  | DK                    |
| BnaC01.GH3-8.a   | YFI.AQGA    | TLTQ | YKTPRC | IK.S.PE | ALQVLE  | SKSGKCLKIAKQEIKNKGKHV |
| BnaC02.GH3-8.b   | FFI.TQGA    | SSTQ | YKTPIC | IK.S.SE | ALAILE  | EK                    |
| BnaC02.GH3-8.c   | FFI.TQGA    | SSTQ | YKTPIC | IK.S.SE | ALAILE  | EK                    |
| BnaC02.GH3-8.d   | FFI.TQGA    | SSTQ | YKTPIC | IK.S.SE | ALAILE  | EK                    |
| BnaC07.GH3-8.e   | YFI.SQGA    | SLAQ | YKTPRC | IK.S.SE | ALQVLE  | NR                    |
| BnaC09.GH3-8.f   | FSI.SQGA    | SPSQ | YKTPMC | IK.S.SE | ALVVDN  | NN                    |
| BnaCX.GH3-8.g    | FFV.SRGA    | SITQ | YKTPIC | IN.S.AE | ALKVLE  | DK                    |
| BnaA05.GH3-9.a   | MII.SQGG    | SLNQ | YKTPRC | VK.SNS  | AMLKLL  | GH                    |
| BnaC04.GH3-9.a   | MII.SQGG    | SLNQ | YKTPRC | VK.SNS  | AMLKLL  | GH                    |
| BnaA03.GH3-10.a  | RCV.GKCG    | GLNQ | FKTPRC | T.TNS   | VMLD    | ILDAS                 |
| BnaA09.GH3-10.b  | RCV.GKCG    | GLNQ | FKTPRC | T.TNS   | VMLD    | ILDGS                 |
| BnaC09.GH3-10.a  | HFL.GLGS    | SAGQ | FKMPRC | VKP.SN  | VKVLQ   | ILCDN                 |
| BnaA03.GH3-11.a  | HFL.GLGS    | SAGQ | FKMPRC | VKP.SN  | VKVLQ   | ILCDN                 |
| BnaA04R.GH3-11.b | HFL.GLGS    | SAGQ | FKMPRC | VKP.SN  | VKVLQ   | ILCDN                 |
| BnaA05.GH3-11.c  | HFL.GLGS    | SAGQ | FKMPRC | VKP.SN  | VKVLQ   | ILCDN                 |
| BnaC04.GH3-11.a  | HFL.GLGS    | SAGQ | FKMPRC | VKP.SN  | VKVLQ   | ILCDN                 |
| BnaCX.GH3-11.b   | HFL.GLGS    | SAGQ | FKMPRC | VKP.SN  | VKVLQ   | ILCDN                 |
| BnaA02.GH3-12.a  | FFI.KQGA    | SISQ | YKTPRC | IK.S.GK | ALEFME  | NY                    |
| BnaA03.GH3-12.b  | FFI.TQGA    | SISQ | YKTPRC | IK.S.VK | ALEFME  | EC                    |
| BnaA06.GH3-12.c  | LSI.SKGT    | SVNQ | YKTPIC | IT.S.EK | GVQVLE  | TN                    |
| BnaA10.GH3-12.d  | FFI.NQGA    | STGQ | YKTPRC | IK.S.GK | ALELME  | DR                    |
| BnaC02.GH3-12.a  | FFI.KQGA    | SISQ | YKTPRC | IK.S.GK | ALEFME  | Y                     |
| BnaC03.GH3-12.b  | FFI.SQGA    | SISQ | YKTPRC | IK.S.VK | ALEFME  | EC                    |
| BnaC09.GH3-12.c  | FFI.NQGA    | SISQ | YKTPRC | IK.S.GK | ALEFME  | DR                    |
| BnaA10.GH3-14.a  | FFV.SRGT    | SVSQ | YKTPRS | VK.N.EE | ALKILE  | AT                    |
| BnaC09.GH3-14.a  | FFV.SRGT    | SVSQ | YKTPRS | VK.N.EE | ALKILE  | AT                    |
| BnaA03.GH3-15.a  | FFV.SRGS    | SVSQ | YKTPRS | VT.N.EE | ALKVLE  | AS                    |
| BnaC03.GH3-15.a  | FFV.SRGS    | SVSQ | YKTPRS | VT.N.EE | ALKVLE  | AS                    |
| BnaAX.GH3-16.a   | LFL.SRGS    | SVSQ | YKTPRS | VT.S.EE | AMKILE  | EA                    |
| BnaC02.GH3-16.a  | LFL.SRGS    | SVSQ | YKTPRS | VT.S.EE | AMKILE  | EA                    |
| BnaA07.GH3-17.a  | FCV.SQGS    | SVNQ | YKTPRC | VK.S.GG | ALQILD  | SR                    |
| BnaA08.GH3-17.b  | FSI.SQGS    | SVNQ | YKTPRC | VK.S.GG | ALQILD  | SR                    |
| BnaA09.GH3-17.c  | FCV.SQGS    | SVNQ | YKTPRC | VK.P.GG | ALQILD  | SR                    |
| BnaC08.GH3-17.a  | FSI.SQGS    | SVNQ | YKTPRC | VK.S.GG | ALQILD  | SR                    |
| BnaCX.GH3-17.b   | FCV.SQGS    | SVNQ | YKTPRC | VK.P.GG | ALQILD  | SR                    |
| BnaCX.GH3-17.c   | FCV.SQGS    | SVNQ | YKTPRC | VK.P.GG | ALQILD  | SR                    |
| BnaA05GH3-18.a   | YFI.SRGS    | SRAQ | YKTPIC | IN.S.SE | ASAVLE  | NK                    |
| BnaCX.GH3-18.a   | FFV.ARG     | SISQ | YKTPMC | IN.S.AE | ALKVLE  | DK                    |
| BnaA06.GH3-19.a  | FFV.SRGS    | SISQ | YKTPMC | IN.S.AE | ALKVLE  | DK                    |
| BnaA09.GH3-19.b  | FFI.SRGS    | SISQ | YKTPIC | IK.S.TE | ALKLLE  | DK                    |
| consensus>70     | f.i.s.g.s.q |      | yktprc | v       | l.le    |                       |



|                 |   | 580              | 590                                |
|-----------------|---|------------------|------------------------------------|
| AtGH3-1         | V | VSAHFS           | PSLPHWTPERRRR                      |
| AtGH3-2         | V | VSAHFS           | PSLPHWSPERRR                       |
| AtGH3-3         | V | VSTHFS           | PALPHWSPERRR                       |
| AtGH3-4         | V | VSAHFS           | PSLPHWSPERRH                       |
| AtGH3-5         | V | VDSYFS           | PKCPKWVPGHKQWGSN                   |
| AtGH3-6         | V | VDSYFS           | PKCPKWSPGHKQWGSN                   |
| AtGH3-7         | V | VATFFS           | T                                  |
| AtGH3-8         | V | HACFFT           | DKSLSLNFSS                         |
| AtGH3-9         | V | MASFFS           | PRDPTWVP                           |
| AtGH3-10        | T | IKRFRS           | SAYD                               |
| AtGH3-11        | V | VSSYFS           | TAF                                |
| AtGH3-12        | V | VAKFFS           | I                                  |
| AtGH3-13        | V | VSEFLS           | QETPPWG                            |
| AtGH3-14        | V | VSEFLS           | QKTPSWELHELHSSR                    |
| AtGH3-15        | V | ISEFLS           | RKIPSWELHELHSSR                    |
| AtGH3-16        | V | VSEFLS           | RKTPSWELHELHSSR                    |
| AtGH3-17        | V | IGRFFS           | KRVQPWEPLGLDS                      |
| AtGH3-18        | V | LARFFS           | EKSPPLDS                           |
| AtGH3-19        | V | IARFYS           | QKSPPLNL                           |
| BraX.GH3-1.a    | V | VSAHFS           | PALPHWTPERRRR                      |
| BraX.GH3-2.a    | V | VSAHFS           | PSLPHWSPERRR                       |
| BraA09.GH3-3.a  | V | ASTHFS           | PALPQWSPERRR                       |
| BraA01.GH3-5.a  | V | VDSYFS           | PKCPKWVPGHKQWGSN                   |
| BraA03.GH3-5.b  | V | VDSYFS           | PKCPKWVPGHKQWGSN                   |
| BraA02.GH3-6.a  | V | VKS YFS          | PKCPKWTPGHKQWGSN                   |
| BraA03.GH3-6.b  | V | VKT YFS          | PKCPKWIPGHKQWGSN                   |
| BraA06.GH3-7.a  | V | VARFFS           | TLRASHVLKP                         |
| BraA08.GH3-7.b  | V | VATFFS           | TGDCSFKN                           |
| BraA02.GH3-8.a  | V | RSRFFT           | DKVPFL                             |
| BraA03.GH3-8.b  | V | BARFFT           | DKSLSLKFSS                         |
| BraA03.GH3-8.c  | V | LARFFS           | EKLP                               |
| BraA03.GH3-8.d  | V | ...              | ...                                |
| BraA06.GH3-8.e  | V | LARFFS           | DKSPPI                             |
| BraA06.GH3-8.f  | V | LARFFN           | DKSPTI                             |
| BraA09.GH3-8.g  | V | LARFFS           | DKSPPF                             |
| BraA09.GH3-8.h  | V | LARFFS           | DKSPTI                             |
| BraA10.GH3-8.i  | V | LACFFS           | DKSPTL                             |
| BraA09.GH3-10.a | T | VKRFFS           | SAYN                               |
| BraA03.GH3-11.a | V | VSRFFS           | TAFE                               |
| BraA04.GH3-11.b | A | VSRFFS           | TAFD                               |
| BraA05.GH3-11.c | V | VSRFFS           | TAFE                               |
| BraA02.GH3-12.a | V | VARFFS           | T                                  |
| BraA03.GH3-12.b | V | VARFFS           | T                                  |
| BraA06.GH3-12.c | V | VAKFFS           | TLRASHFA                           |
| BraA10.GH3-12.d | V | VAKFFS           | S                                  |
| BraA10.GH3-14.a | V | VSKSFS           | RKVP SWELHELHSSR                   |
| BraA03.GH3-15.a | V | VSKFVS           | RKTPSWELHELHSSR                    |
| BraA07.GH3-15.b | V | VSKFVS           | RKVP SWELHELHSSR                   |
| BraA02.GH3-16.a | V | VSEFLS           | TKTPSWEPREMHSSR                    |
| BraA07.GH3-17.a | V | IGRFFS           | QRVQPWEPLGLDS                      |
| BraA09.GH3-17.b | V | IGRFFS           | QRVQPWQPLGLDS                      |
| BraAX.GH3-17.c  | V | IGRFFT           | KRVQPWEPLGLDS                      |
| BraA04.GH3-19.a | V | ...              | ...                                |
| BraA06.GH3-19.b | V | LARFFS           | DKSPPI                             |
| BraA09.GH3-19.c | V | LARFFS           | DRSPTL                             |
| BraA09.GH3-19.d | V | LARFFS           | DKSPPI                             |
| BraAX.GH3-19.e  | V | LARFHS           | EKSPPLDL                           |
| BolC09.GH3-1.a  | V | VSAHFS           | PALPHWTPERRRR                      |
| BolC01.GH3-2.a  | V | VSAHFS           | PSLPHWSPERRR                       |
| BolC08.GH3-3.a  | V | ASTHFS           | PALPQWSPERRR                       |
| BolC01.GH3-5.a  | V | VDSYFS           | PKCPKWVPGHKQWGSN                   |
| BolC07.GH3-5.b  | V | VDSYFS           | PKCPKWVPGHKQWGSN                   |
| BolC02.GH3-6.a  | V | VKS YFS          | PKCPKWTPGHKQWGSN                   |
| BolC03.GH3-6.b  | V | VKT YFS          | PKCPKWIPGHKQWGSN                   |
| BolC06.GH3-7.a  | V | VTKFFS           | TLRASHFA                           |
| BolC01.GH3-8.a  | V | LLVDPKSVTDINGAVO | LTNMLMDRNSVMEFLPKGWLKLAGVGOLVYQWVA |
| BolC03.GH3-8.b  | V | ...              | ...                                |
| BolC07.GH3-8.c  | V | LARFFS           | EKLP                               |
| BolC08.GH3-8.d  | V | LARFFS           | DKSPPI                             |
| BolC09.GH3-8.e  | V | TMVFLTR          |                                    |
| BolC09.GH3-10.a | T | VKRFFS           | SAYN                               |
| BolC03.GH3-11.a | V | VSRFFS           | TAFE                               |
| BolC04.GH3-11.b | V | VSRFFS           | TAFD                               |
| BolCX.GH3-11.c  | V | VSRFFS           | TAFE                               |
| BolC03.GH3-12.a | V | VARFFS           | T                                  |
| BolC09.GH3-12.b | V | VAKFFS           | A                                  |
| BolC09.GH3-14.a | V | VSKSFS           | QKVP SWELHELHSSR                   |
| BolC03.GH3-15.a | V | VSKFVS           | RKTPSWELHELHSSR                    |
| BolCX.GH3-16.a  | V | VSEFLS           | TKTPSWEPREMHSSR                    |
| BolC07.GH3-17.a | V | IGSFFS           | KRVQPWEPLGLDS                      |
| BolC08.GH3-17.b | V | IGKFFT           | KRVQPWEPLGLDS                      |
| BolC08.GH3-19.a | V | LARFFS           | DRSPTL                             |
| BnaA09R.GH3-1.a | V | VSAHFS           | PALPHWTPERRRR                      |
| BnaCX.GH3-1.a   | V | VSAHFS           | PALPHWTPERRRR                      |
| BnaA01.GH3-2.a  | V | VSAHFS           | PSLPHWSPERRR                       |
| BnaC01.GH3-2.a  | V | VSAHFS           | PSLPHWSPERRR                       |
| BnaA09.GH3-3.a  | V | ASTHFS           | PALPQWSPERRR                       |
| BnaC08.GH3-3.a  | V | ASTHFS           | PALPQWSPERRR                       |
| BnaA01.GH3-5.a  | V | VDSYFS           | PKCPKWVPGHKQWGSN                   |
| BnaA03.GH3-5.b  | V | VDSYFS           | PKCPKWVPGHKQWGSN                   |
| BnaC01.GH3-5.a  | V | VDSYFS           | PKCPKWVPGHKQWGSN                   |
| BnaC07.GH3-5.b  | V | VDSYFS           | PKCPKWVPGHKQWGSN                   |
| BnaA03.GH3-6.a  | V | VKT YFS          | PKCPKWIPGHKQWGSN                   |
| BnaAX.GH3-6.b   | V | VKS YFS          | PKCPKWTPGHKQWGSN                   |
| BnaC03.GH3-6.a  | V | VKT YFS          | PKCPKWIPGHKQWGSN                   |
| BnaCX.GH3-6.b   | V | VKS YFS          | PKCPKWTPGHKQWGSN                   |
| BnaA06.GH3-7.a  | V | VARFFS           | TLRASHVLKP                         |
| BnaA08.GH3-7.b  | V | VATFFS           | TGDCSFKN                           |
| BnaC06.GH3-7.a  | V | VTKFFS           | TLRASHFA                           |
| BnaA03.GH3-8.a  | V | BARFFT           | DKSLSLKFSS                         |
| BnaA03.GH3-8.b  | V | LARFFS           | EKLP                               |
| BnaA03.GH3-8.c  | V | MAHERFIAY        |                                    |
| BnaA06.GH3-8.d  | V | LARFFS           | DKSPPI                             |

|                  |   |                           |                                   |
|------------------|---|---------------------------|-----------------------------------|
| BnaA06.GH3-8.e   | V | L                         | ARFFNDKSPTI                       |
| BnaA09.GH3-8.f   | . | S                         | YISKRIPVWL                        |
| BnaA09.GH3-8.g   | V | L                         | ARFFS                             |
| BnaAX.GH3-8.h    | V | RSR                       | FFTDKVPFL                         |
| BnaAX.GH3-8.i    | V | L                         | ARFFS                             |
| BnaC01.GH3-8.a   | V | LLVDPKSVTDINGAVQVRCVNYVLI | NMFLMDRNSVMEFLPKGWLKLAGVGQLVYQWVA |
| BnaC02.GH3-8.b   | V | RSR                       | FFTDKVPFL                         |
| BnaC02.GH3-8.c   | V | RSR                       | FFTDKVPFL                         |
| BnaC02.GH3-8.d   | V | RSR                       | FFTDKVPFL                         |
| BnaC07.GH3-8.e   | V | L                         | ARFFSEKLP                         |
| BnaC09.GH3-8.f   | V | L                         | ARFFS                             |
| BnaCX.GH3-8.g    | V | L                         | ARFFS                             |
| BnaA05.GH3-9.a   | V | TGS                       | FFSPRDPTWSA                       |
| BnaC04.GH3-9.a   | V | TGS                       | FFSPRDPTWSP                       |
| BnaA03.GH3-10.a  | T | V                         | KIFCS                             |
| BnaA09.GH3-10.b  | T | V                         | KRFSS                             |
| BnaC09.GH3-10.a  | T | V                         | KRFSS                             |
| BnaA03.GH3-11.a  | V | V                         | SRFFSTAFE                         |
| BnaA04R.GH3-11.b | A | V                         | SRFFSTAFD                         |
| BnaA05.GH3-11.c  | V | V                         | SRFFSTAFE                         |
| BnaC04.GH3-11.a  | V | V                         | SRFFSTAFD                         |
| BnaCX.GH3-11.b   | V | V                         | SRFFSTAFE                         |
| BnaA02.GH3-12.a  | V | V                         | ARFFST                            |
| BnaA03.GH3-12.b  | V | V                         | ARFFST                            |
| BnaA06.GH3-12.c  | V | V                         | AKFFSTLSASHFA                     |
| BnaA10.GH3-12.d  | V | V                         | AKFFSS                            |
| BnaC02.GH3-12.a  | V | V                         | ASFFST                            |
| BnaC03.GH3-12.b  | V | V                         | ARFFST                            |
| BnaC09.GH3-12.c  | V | V                         | AKFSSA                            |
| BnaA10.GH3-14.a  | V | V                         | SKSFS                             |
| BnaC09.GH3-14.a  | V | V                         | SKSFS                             |
| BnaA03.GH3-15.a  | V | V                         | SKFVS                             |
| BnaC03.GH3-15.a  | . | .                         | .                                 |
| BnaAX.GH3-16.a   | V | V                         | SEFLS                             |
| BnaC02.GH3-16.a  | V | V                         | SEFLS                             |
| BnaA07.GH3-17.a  | V | I                         | GRFFS                             |
| BnaA08.GH3-17.b  | V | I                         | GRFFT                             |
| BnaA09.GH3-17.c  | V | I                         | GRFFS                             |
| BnaC08.GH3-17.a  | V | I                         | GKFFT                             |
| BnaCX.GH3-17.b   | V | I                         | GRFFS                             |
| BnaCX.GH3-17.c   | V | I                         | GRFFS                             |
| BnaA05GH3-18.a   | V | L                         | ARFHSEKSPPLDL                     |
| BnaCX.GH3-18.a   | V | L                         | ARFFS                             |
| BnaA06.GH3-19.a  | V | L                         | ARFFS                             |
| BnaA09.GH3-19.b  | V | L                         | ARFFS                             |
| consensus>70     | V | .                         | ffs                               |

|                 |                      |
|-----------------|----------------------|
| AtGH3-1         | .                    |
| AtGH3-2         | .                    |
| AtGH3-3         | .                    |
| AtGH3-4         | .                    |
| AtGH3-5         | .                    |
| AtGH3-6         | .                    |
| AtGH3-7         | .                    |
| AtGH3-8         | .                    |
| AtGH3-9         | .                    |
| AtGH3-10        | .                    |
| AtGH3-11        | .                    |
| AtGH3-12        | .                    |
| AtGH3-13        | .                    |
| AtGH3-14        | .                    |
| AtGH3-15        | .                    |
| AtGH3-16        | .                    |
| AtGH3-17        | .                    |
| AtGH3-18        | .                    |
| AtGH3-19        | .                    |
| BraX.GH3-1.a    | .                    |
| BraX.GH3-2.a    | .                    |
| BraA09.GH3-3.a  | .                    |
| BraA01.GH3-5.a  | .                    |
| BraA03.GH3-5.b  | .                    |
| BraA02.GH3-6.a  | .                    |
| BraA03.GH3-6.b  | .                    |
| BraA06.GH3-7.a  | .                    |
| BraA08.GH3-7.b  | .                    |
| BraA02.GH3-8.a  | .                    |
| BraA03.GH3-8.b  | .                    |
| BraA03.GH3-8.c  | .                    |
| BraA03.GH3-8.d  | .                    |
| BraA06.GH3-8.e  | .                    |
| BraA06.GH3-8.f  | .                    |
| BraA09.GH3-8.g  | .                    |
| BraA09.GH3-8.h  | .                    |
| BraA10.GH3-8.i  | .                    |
| BraA09.GH3-10.a | .                    |
| BraA03.GH3-11.a | .                    |
| BraA04.GH3-11.b | .                    |
| BraA05.GH3-11.c | .                    |
| BraA02.GH3-12.a | .                    |
| BraA03.GH3-12.b | .                    |
| BraA06.GH3-12.c | .                    |
| BraA10.GH3-12.d | .                    |
| BraA10.GH3-14.a | .                    |
| BraA03.GH3-15.a | .                    |
| BraA07.GH3-15.b | .                    |
| BraA02.GH3-16.a | .                    |
| BraA07.GH3-17.a | .                    |
| BraA09.GH3-17.b | .                    |
| BraAX.GH3-17.c  | .                    |
| BraA04.GH3-19.a | .                    |
| BraA06.GH3-19.b | .                    |
| BraA09.GH3-19.c | .                    |
| BraA09.GH3-19.d | .                    |
| BraAX.GH3-19.e  | .                    |
| BolC09.GH3-1.a  | .                    |
| BolC01.GH3-2.a  | .                    |
| BolC08.GH3-3.a  | .                    |
| BolC01.GH3-5.a  | .                    |
| BolC07.GH3-5.b  | .                    |
| BolC02.GH3-6.a  | .                    |
| BolC03.GH3-6.b  | .                    |
| BolC06.GH3-7.a  | .                    |
| BolC01.GH3-8.a  | NWSRIRHEGTWHDPVGETC. |
| BolC03.GH3-8.b  | .                    |
| BolC07.GH3-8.c  | .                    |
| BolC08.GH3-8.d  | .                    |
| BolC09.GH3-8.e  | .                    |
| BolC09.GH3-10.a | .                    |
| BolC03.GH3-11.a | .                    |
| BolC04.GH3-11.b | .                    |
| BolCX.GH3-11.c  | .                    |
| BolC03.GH3-12.a | .                    |
| BolC09.GH3-12.b | .                    |
| BolC09.GH3-14.a | .                    |
| BolC03.GH3-15.a | .                    |
| BolCX.GH3-16.a  | .                    |
| BolC07.GH3-17.a | .                    |
| BolC08.GH3-17.b | .                    |
| BolC08.GH3-19.a | .                    |
| BnaA09R.GH3-1.a | .                    |
| BnaCX.GH3-1.a   | .                    |
| BnaA01.GH3-2.a  | .                    |
| BnaC01.GH3-2.a  | .                    |
| BnaA09.GH3-3.a  | .                    |
| BnaC08.GH3-3.a  | .                    |
| BnaA01.GH3-5.a  | .                    |
| BnaA03.GH3-5.b  | .                    |
| BnaC01.GH3-5.a  | .                    |
| BnaC07.GH3-5.b  | .                    |
| BnaA03.GH3-6.a  | .                    |
| BnaAX.GH3-6.b   | .                    |
| BnaC03.GH3-6.a  | .                    |
| BnaCX.GH3-6.b   | .                    |
| BnaA06.GH3-7.a  | .                    |
| BnaA08.GH3-7.b  | .                    |
| BnaC06.GH3-7.a  | .                    |
| BnaA03.GH3-8.a  | .                    |
| BnaA03.GH3-8.b  | .                    |
| BnaA03.GH3-8.c  | .                    |
| BnaA06.GH3-8.d  | .                    |

|                  |                                                              |
|------------------|--------------------------------------------------------------|
| BnaA06.GH3-8.e   | .....                                                        |
| BnaA09.GH3-8.f   | .....                                                        |
| BnaA09.GH3-8.g   | .....                                                        |
| BnaAX.GH3-8.h    | .....                                                        |
| BnaAX.GH3-8.i    | .....                                                        |
| BnaC01.GH3-8.a   | NWSRIRHEGTWHPVGETLAASLLMAIMFSAMITSSRATKQLTKKQTLKPKFFGQPFPPKP |
| BnaC02.GH3-8.b   | .....                                                        |
| BnaC02.GH3-8.c   | .....                                                        |
| BnaC02.GH3-8.d   | .....                                                        |
| BnaC07.GH3-8.e   | .....                                                        |
| BnaC09.GH3-8.f   | .....                                                        |
| BnaCX.GH3-8.g    | .....                                                        |
| BnaA05.GH3-9.a   | .....                                                        |
| BnaC04.GH3-9.a   | .....                                                        |
| BnaA03.GH3-10.a  | .....                                                        |
| BnaA09.GH3-10.b  | .....                                                        |
| BnaC09.GH3-10.a  | .....                                                        |
| BnaA03.GH3-11.a  | .....                                                        |
| BnaA04R.GH3-11.b | .....                                                        |
| BnaA05.GH3-11.c  | .....                                                        |
| BnaC04.GH3-11.a  | .....                                                        |
| BnaCX.GH3-11.b   | .....                                                        |
| BnaA02.GH3-12.a  | .....                                                        |
| BnaA03.GH3-12.b  | .....                                                        |
| BnaA06.GH3-12.c  | .....                                                        |
| BnaA10.GH3-12.d  | .....                                                        |
| BnaC02.GH3-12.a  | .....                                                        |
| BnaC03.GH3-12.b  | .....                                                        |
| BnaC09.GH3-12.c  | .....                                                        |
| BnaA10.GH3-14.a  | .....                                                        |
| BnaC09.GH3-14.a  | .....                                                        |
| BnaA03.GH3-15.a  | .....                                                        |
| BnaC03.GH3-15.a  | .....                                                        |
| BnaAX.GH3-16.a   | .....                                                        |
| BnaC02.GH3-16.a  | .....                                                        |
| BnaA07.GH3-17.a  | .....                                                        |
| BnaA08.GH3-17.b  | .....                                                        |
| BnaA09.GH3-17.c  | .....                                                        |
| BnaC08.GH3-17.a  | .....                                                        |
| BnaCX.GH3-17.b   | .....                                                        |
| BnaCX.GH3-17.c   | .....                                                        |
| BnaA05GH3-18.a   | .....                                                        |
| BnaCX.GH3-18.a   | .....                                                        |
| BnaA06.GH3-19.a  | .....                                                        |
| BnaA09.GH3-19.b  | .....                                                        |
| consensus>70     | .....                                                        |



|                 |  |
|-----------------|--|
| AtGH3-1         |  |
| AtGH3-2         |  |
| AtGH3-3         |  |
| AtGH3-4         |  |
| AtGH3-5         |  |
| AtGH3-6         |  |
| AtGH3-7         |  |
| AtGH3-8         |  |
| AtGH3-9         |  |
| AtGH3-10        |  |
| AtGH3-11        |  |
| AtGH3-12        |  |
| AtGH3-13        |  |
| AtGH3-14        |  |
| AtGH3-15        |  |
| AtGH3-16        |  |
| AtGH3-17        |  |
| AtGH3-18        |  |
| AtGH3-19        |  |
| BraX.GH3-1.a    |  |
| BraX.GH3-2.a    |  |
| BraA09.GH3-3.a  |  |
| BraA01.GH3-5.a  |  |
| BraA03.GH3-5.b  |  |
| BraA02.GH3-6.a  |  |
| BraA03.GH3-6.b  |  |
| BraA06.GH3-7.a  |  |
| BraA08.GH3-7.b  |  |
| BraA02.GH3-8.a  |  |
| BraA03.GH3-8.b  |  |
| BraA03.GH3-8.c  |  |
| BraA03.GH3-8.d  |  |
| BraA06.GH3-8.e  |  |
| BraA06.GH3-8.f  |  |
| BraA09.GH3-8.g  |  |
| BraA09.GH3-8.h  |  |
| BraA10.GH3-8.i  |  |
| BraA09.GH3-10.a |  |
| BraA03.GH3-11.a |  |
| BraA04.GH3-11.b |  |
| BraA05.GH3-11.c |  |
| BraA02.GH3-12.a |  |
| BraA03.GH3-12.b |  |
| BraA06.GH3-12.c |  |
| BraA10.GH3-12.d |  |
| BraA10.GH3-14.a |  |
| BraA03.GH3-15.a |  |
| BraA07.GH3-15.b |  |
| BraA02.GH3-16.a |  |
| BraA07.GH3-17.a |  |
| BraA09.GH3-17.b |  |
| BraAX.GH3-17.c  |  |
| BraA04.GH3-19.a |  |
| BraA06.GH3-19.b |  |
| BraA09.GH3-19.c |  |
| BraA09.GH3-19.d |  |
| BraAX.GH3-19.e  |  |
| BolC09.GH3-1.a  |  |
| BolC01.GH3-2.a  |  |
| BolC08.GH3-3.a  |  |
| BolC01.GH3-5.a  |  |
| BolC07.GH3-5.b  |  |
| BolC02.GH3-6.a  |  |
| BolC03.GH3-6.b  |  |
| BolC06.GH3-7.a  |  |
| BolC01.GH3-8.a  |  |
| BolC03.GH3-8.b  |  |
| BolC07.GH3-8.c  |  |
| BolC08.GH3-8.d  |  |
| BolC09.GH3-8.e  |  |
| BolC09.GH3-10.a |  |
| BolC03.GH3-11.a |  |
| BolC04.GH3-11.b |  |
| BolCX.GH3-11.c  |  |
| BolC03.GH3-12.a |  |
| BolC09.GH3-12.b |  |
| BolC09.GH3-14.a |  |
| BolC03.GH3-15.a |  |
| BolCX.GH3-16.a  |  |
| BolC07.GH3-17.a |  |
| BolC08.GH3-17.b |  |
| BolC08.GH3-19.a |  |
| BnaA09R.GH3-1.a |  |
| BnaCX.GH3-1.a   |  |
| BnaA01.GH3-2.a  |  |
| BnaC01.GH3-2.a  |  |
| BnaA09.GH3-3.a  |  |
| BnaC08.GH3-3.a  |  |
| BnaA01.GH3-5.a  |  |
| BnaA03.GH3-5.b  |  |
| BnaC01.GH3-5.a  |  |
| BnaC07.GH3-5.b  |  |
| BnaA03.GH3-6.a  |  |
| BnaAX.GH3-6.b   |  |
| BnaC03.GH3-6.a  |  |
| BnaCX.GH3-6.b   |  |
| BnaA06.GH3-7.a  |  |
| BnaA08.GH3-7.b  |  |
| BnaC06.GH3-7.a  |  |
| BnaA03.GH3-8.a  |  |
| BnaA03.GH3-8.b  |  |
| BnaA03.GH3-8.c  |  |
| BnaA06.GH3-8.d  |  |

|                  |                                                                  |
|------------------|------------------------------------------------------------------|
| BnaA06.GH3-8.e   | .....                                                            |
| BnaA09.GH3-8.f   | .....                                                            |
| BnaA09.GH3-8.g   | .....                                                            |
| BnaAX.GH3-8.h    | .....                                                            |
| BnaAX.GH3-8.i    | .....                                                            |
| BnaC01.GH3-8.a   | GLPQFP RP PGFP TNPMFP QFPKPGFPQLPGQGFPKNPMFP QFPKPGFPQFP GF GFKF |
| BnaC02.GH3-8.b   | .....                                                            |
| BnaC02.GH3-8.c   | .....                                                            |
| BnaC02.GH3-8.d   | .....                                                            |
| BnaC07.GH3-8.e   | .....                                                            |
| BnaC09.GH3-8.f   | .....                                                            |
| BnaCX.GH3-8.g    | .....                                                            |
| BnaA05.GH3-9.a   | .....                                                            |
| BnaC04.GH3-9.a   | .....                                                            |
| BnaA03.GH3-10.a  | .....                                                            |
| BnaA09.GH3-10.b  | .....                                                            |
| BnaC09.GH3-10.a  | .....                                                            |
| BnaA03.GH3-11.a  | .....                                                            |
| BnaA04R.GH3-11.b | .....                                                            |
| BnaA05.GH3-11.c  | .....                                                            |
| BnaC04.GH3-11.a  | .....                                                            |
| BnaCX.GH3-11.b   | .....                                                            |
| BnaA02.GH3-12.a  | .....                                                            |
| BnaA03.GH3-12.b  | .....                                                            |
| BnaA06.GH3-12.c  | .....                                                            |
| BnaA10.GH3-12.d  | .....                                                            |
| BnaC02.GH3-12.a  | .....                                                            |
| BnaC03.GH3-12.b  | .....                                                            |
| BnaC09.GH3-12.c  | .....                                                            |
| BnaA10.GH3-14.a  | .....                                                            |
| BnaC09.GH3-14.a  | .....                                                            |
| BnaA03.GH3-15.a  | .....                                                            |
| BnaC03.GH3-15.a  | .....                                                            |
| BnaAX.GH3-16.a   | .....                                                            |
| BnaC02.GH3-16.a  | .....                                                            |
| BnaA07.GH3-17.a  | .....                                                            |
| BnaA08.GH3-17.b  | .....                                                            |
| BnaA09.GH3-17.c  | .....                                                            |
| BnaC08.GH3-17.a  | .....                                                            |
| BnaCX.GH3-17.b   | .....                                                            |
| BnaCX.GH3-17.c   | .....                                                            |
| BnaA05GH3-18.a   | .....                                                            |
| BnaCX.GH3-18.a   | .....                                                            |
| BnaA06.GH3-19.a  | .....                                                            |
| BnaA09.GH3-19.b  | .....                                                            |
| consensus>70     | .....                                                            |

|                 |       |
|-----------------|-------|
| AtGH3-1         | ..... |
| AtGH3-2         | ..... |
| AtGH3-3         | ..... |
| AtGH3-4         | ..... |
| AtGH3-5         | ..... |
| AtGH3-6         | ..... |
| AtGH3-7         | ..... |
| AtGH3-8         | ..... |
| AtGH3-9         | ..... |
| AtGH3-10        | ..... |
| AtGH3-11        | ..... |
| AtGH3-12        | ..... |
| AtGH3-13        | ..... |
| AtGH3-14        | ..... |
| AtGH3-15        | ..... |
| AtGH3-16        | ..... |
| AtGH3-17        | ..... |
| AtGH3-18        | ..... |
| AtGH3-19        | ..... |
| BraX.GH3-1.a    | ..... |
| BraX.GH3-2.a    | ..... |
| BraA09.GH3-3.a  | ..... |
| BraA01.GH3-5.a  | ..... |
| BraA03.GH3-5.b  | ..... |
| BraA02.GH3-6.a  | ..... |
| BraA03.GH3-6.b  | ..... |
| BraA06.GH3-7.a  | ..... |
| BraA08.GH3-7.b  | ..... |
| BraA02.GH3-8.a  | ..... |
| BraA03.GH3-8.b  | ..... |
| BraA03.GH3-8.c  | ..... |
| BraA03.GH3-8.d  | ..... |
| BraA06.GH3-8.e  | ..... |
| BraA06.GH3-8.f  | ..... |
| BraA09.GH3-8.g  | ..... |
| BraA09.GH3-8.h  | ..... |
| BraA10.GH3-8.i  | ..... |
| BraA09.GH3-10.a | ..... |
| BraA03.GH3-11.a | ..... |
| BraA04.GH3-11.b | ..... |
| BraA05.GH3-11.c | ..... |
| BraA02.GH3-12.a | ..... |
| BraA03.GH3-12.b | ..... |
| BraA06.GH3-12.c | ..... |
| BraA10.GH3-12.d | ..... |
| BraA10.GH3-14.a | ..... |
| BraA03.GH3-15.a | ..... |
| BraA07.GH3-15.b | ..... |
| BraA02.GH3-16.a | ..... |
| BraA07.GH3-17.a | ..... |
| BraA09.GH3-17.b | ..... |
| BraAX.GH3-17.c  | ..... |
| BraA04.GH3-19.a | ..... |
| BraA06.GH3-19.b | ..... |
| BraA09.GH3-19.c | ..... |
| BraA09.GH3-19.d | ..... |
| BraAX.GH3-19.e  | ..... |
| BolC09.GH3-1.a  | ..... |
| BolC01.GH3-2.a  | ..... |
| BolC08.GH3-3.a  | ..... |
| BolC01.GH3-5.a  | ..... |
| BolC07.GH3-5.b  | ..... |
| BolC02.GH3-6.a  | ..... |
| BolC03.GH3-6.b  | ..... |
| BolC06.GH3-7.a  | ..... |
| BolC01.GH3-8.a  | ..... |
| BolC03.GH3-8.b  | ..... |
| BolC07.GH3-8.c  | ..... |
| BolC08.GH3-8.d  | ..... |
| BolC09.GH3-8.e  | ..... |
| BolC09.GH3-10.a | ..... |
| BolC03.GH3-11.a | ..... |
| BolC04.GH3-11.b | ..... |
| BolCX.GH3-11.c  | ..... |
| BolC03.GH3-12.a | ..... |
| BolC09.GH3-12.b | ..... |
| BolC09.GH3-14.a | ..... |
| BolC03.GH3-15.a | ..... |
| BolCX.GH3-16.a  | ..... |
| BolC07.GH3-17.a | ..... |
| BolC08.GH3-17.b | ..... |
| BolC08.GH3-19.a | ..... |
| BnaA09R.GH3-1.a | ..... |
| BnaCX.GH3-1.a   | ..... |
| BnaA01.GH3-2.a  | ..... |
| BnaC01.GH3-2.a  | ..... |
| BnaA09.GH3-3.a  | ..... |
| BnaC08.GH3-3.a  | ..... |
| BnaA01.GH3-5.a  | ..... |
| BnaA03.GH3-5.b  | ..... |
| BnaC01.GH3-5.a  | ..... |
| BnaC07.GH3-5.b  | ..... |
| BnaA03.GH3-6.a  | ..... |
| BnaAX.GH3-6.b   | ..... |
| BnaC03.GH3-6.a  | ..... |
| BnaCX.GH3-6.b   | ..... |
| BnaA06.GH3-7.a  | ..... |
| BnaA08.GH3-7.b  | ..... |
| BnaC06.GH3-7.a  | ..... |
| BnaA03.GH3-8.a  | ..... |
| BnaA03.GH3-8.b  | ..... |
| BnaA03.GH3-8.c  | ..... |
| BnaA06.GH3-8.d  | ..... |

|                  |                                 |
|------------------|---------------------------------|
| BnaA06.GH3-8.e   | .....                           |
| BnaA09.GH3-8.f   | .....                           |
| BnaA09.GH3-8.g   | .....                           |
| BnaAX.GH3-8.h    | .....                           |
| BnaAX.GH3-8.i    | .....                           |
| BnaC01.GH3-8.a   | PQFPKPGSPSFPPATPTISTPPSIPVPTLSN |
| BnaC02.GH3-8.b   | .....                           |
| BnaC02.GH3-8.c   | .....                           |
| BnaC02.GH3-8.d   | .....                           |
| BnaC07.GH3-8.e   | .....                           |
| BnaC09.GH3-8.f   | .....                           |
| BnaCX.GH3-8.g    | .....                           |
| BnaA05.GH3-9.a   | .....                           |
| BnaC04.GH3-9.a   | .....                           |
| BnaA03.GH3-10.a  | .....                           |
| BnaA09.GH3-10.b  | .....                           |
| BnaC09.GH3-10.a  | .....                           |
| BnaA03.GH3-11.a  | .....                           |
| BnaA04R.GH3-11.b | .....                           |
| BnaA05.GH3-11.c  | .....                           |
| BnaC04.GH3-11.a  | .....                           |
| BnaCX.GH3-11.b   | .....                           |
| BnaA02.GH3-12.a  | .....                           |
| BnaA03.GH3-12.b  | .....                           |
| BnaA06.GH3-12.c  | .....                           |
| BnaA10.GH3-12.d  | .....                           |
| BnaC02.GH3-12.a  | .....                           |
| BnaC03.GH3-12.b  | .....                           |
| BnaC09.GH3-12.c  | .....                           |
| BnaA10.GH3-14.a  | .....                           |
| BnaC09.GH3-14.a  | .....                           |
| BnaA03.GH3-15.a  | .....                           |
| BnaC03.GH3-15.a  | .....                           |
| BnaAX.GH3-16.a   | .....                           |
| BnaC02.GH3-16.a  | .....                           |
| BnaA07.GH3-17.a  | .....                           |
| BnaA08.GH3-17.b  | .....                           |
| BnaA09.GH3-17.c  | .....                           |
| BnaC08.GH3-17.a  | .....                           |
| BnaCX.GH3-17.b   | .....                           |
| BnaCX.GH3-17.c   | .....                           |
| BnaA05GH3-18.a   | .....                           |
| BnaCX.GH3-18.a   | .....                           |
| BnaA06.GH3-19.a  | .....                           |
| BnaA09.GH3-19.b  | .....                           |
| consensus>70     | .....                           |
